# Supplementary material
Source: PubMed Central journal article supplement (PMC4943583)

# Supporting Information

## **5,10b-Ethanophenanthridine Amaryllidaceae Alkaloids Inspire the Discovery of Novel Bicyclic Ring Systems with Activity Against Drug Resistant Cancer Cells**

Sean Henry, Mary R. Reisenauer, Igor V. Magedov, Ria Quintana, Robert Kiss, Véronique Mathieu, Florence Lefranc, Ramesh Dasari, Antonio Evidente, **Xiaojie Yu**, Xiuye Ma, Alexander Pertsemliadis, David A. Cavazos, Andrew J. Brenner, Snezna Rogelj, Alexander Kornienko,\* and Liliya V. Frolova\*

*Departments of Chemistry and Biology, New Mexico Institute of Mining and Technology, Socorro, NM 87801, USA; Laboratoire de Cancérologie et de Toxicologie Expérimentale, Faculté de Pharmacie, Université Libre de Bruxelles (ULB), Campus de la Plaine, CP205/1, Boulevard du Triomphe, Brussels, Belgium; Service de Neurochirurgie, Hôpital Erasme, ULB, 808 route de Lennik, 1070 Brussels, Belgium ; Department of Chemistry and Biochemistry, Texas State University, San Marcos, TX 78666, USA; Cancer Therapy and Research Center, The University of Texas Health Science Center at San Antonio, 7703 Floyd Curl Drive, San Antonio, Texas 78229, USA; Dipartimento di Scienze Chimiche, Università di Napoli Federico II, Complesso Universitario Monte Sant'Angelo, Via Cintia 4, 80126 Napoli, Italy; Greehey Children's Cancer Research Institute, UT Health Science Center at San Antonio, 8403 Floyd Curl Drive, San Antonio, TX 78229, USA; Cancer Therapy and Research Center, The University of Texas Health Science Center at San Antonio, 7703 Floyd Curl Drive, San Antonio, Texas 78229, USA*

**Copies of  $^1\text{H}$  and  $^{13}\text{C}$  NMR Spectra for All New Compounds**

2c

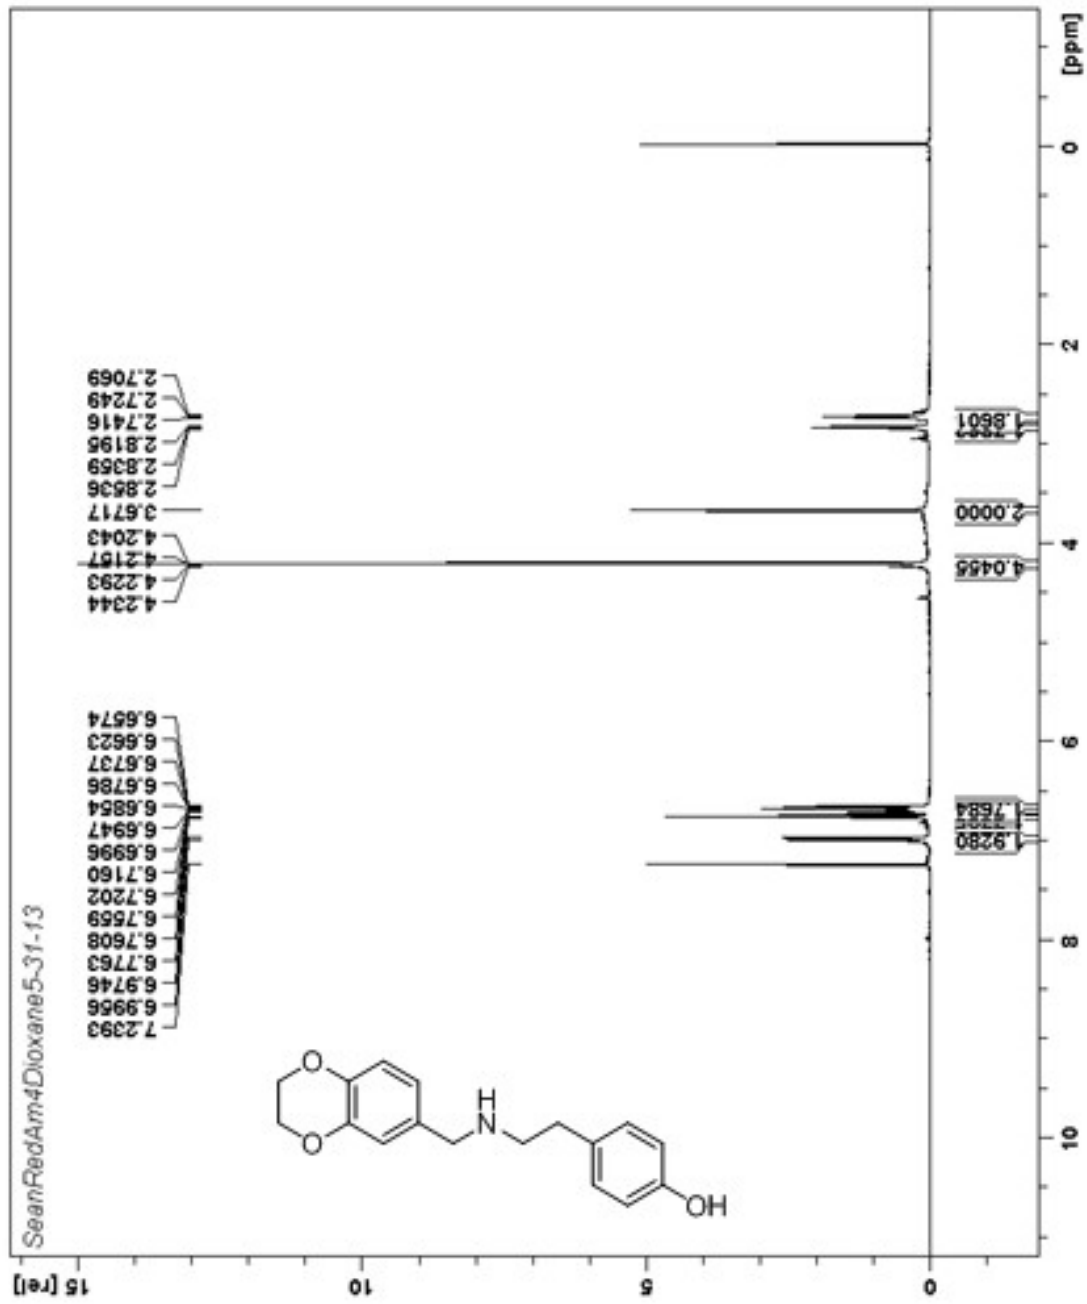

2c

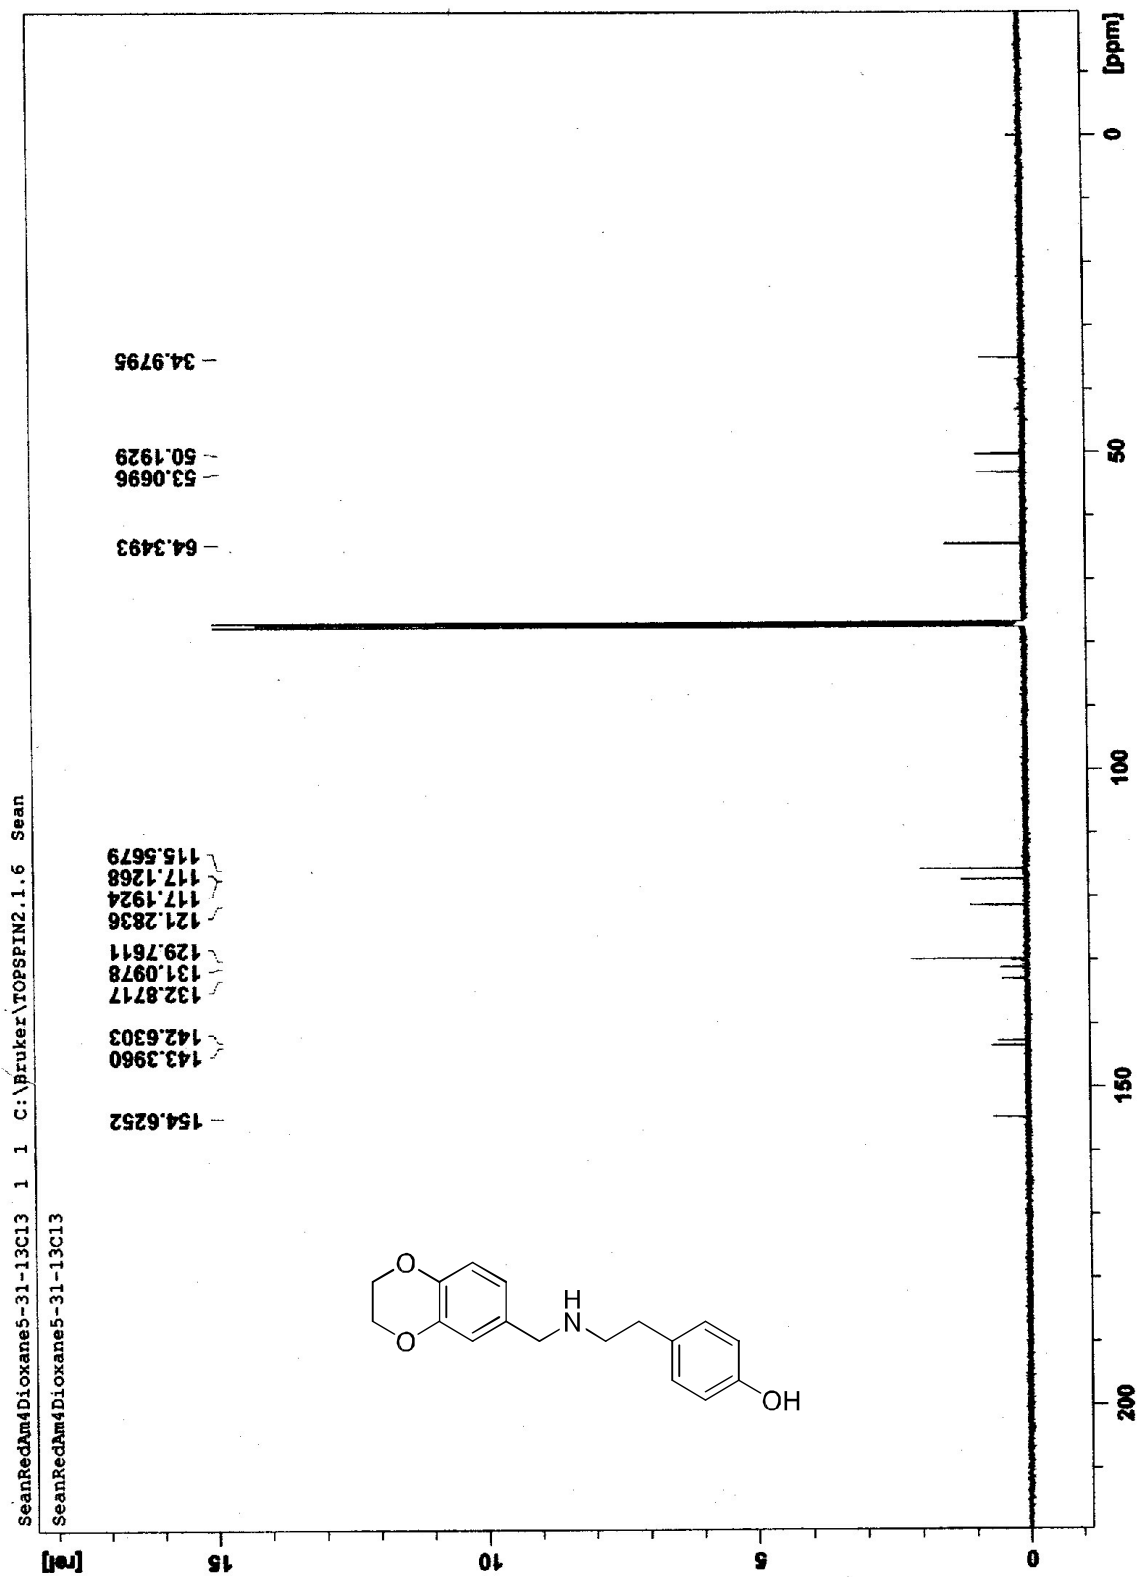

2d

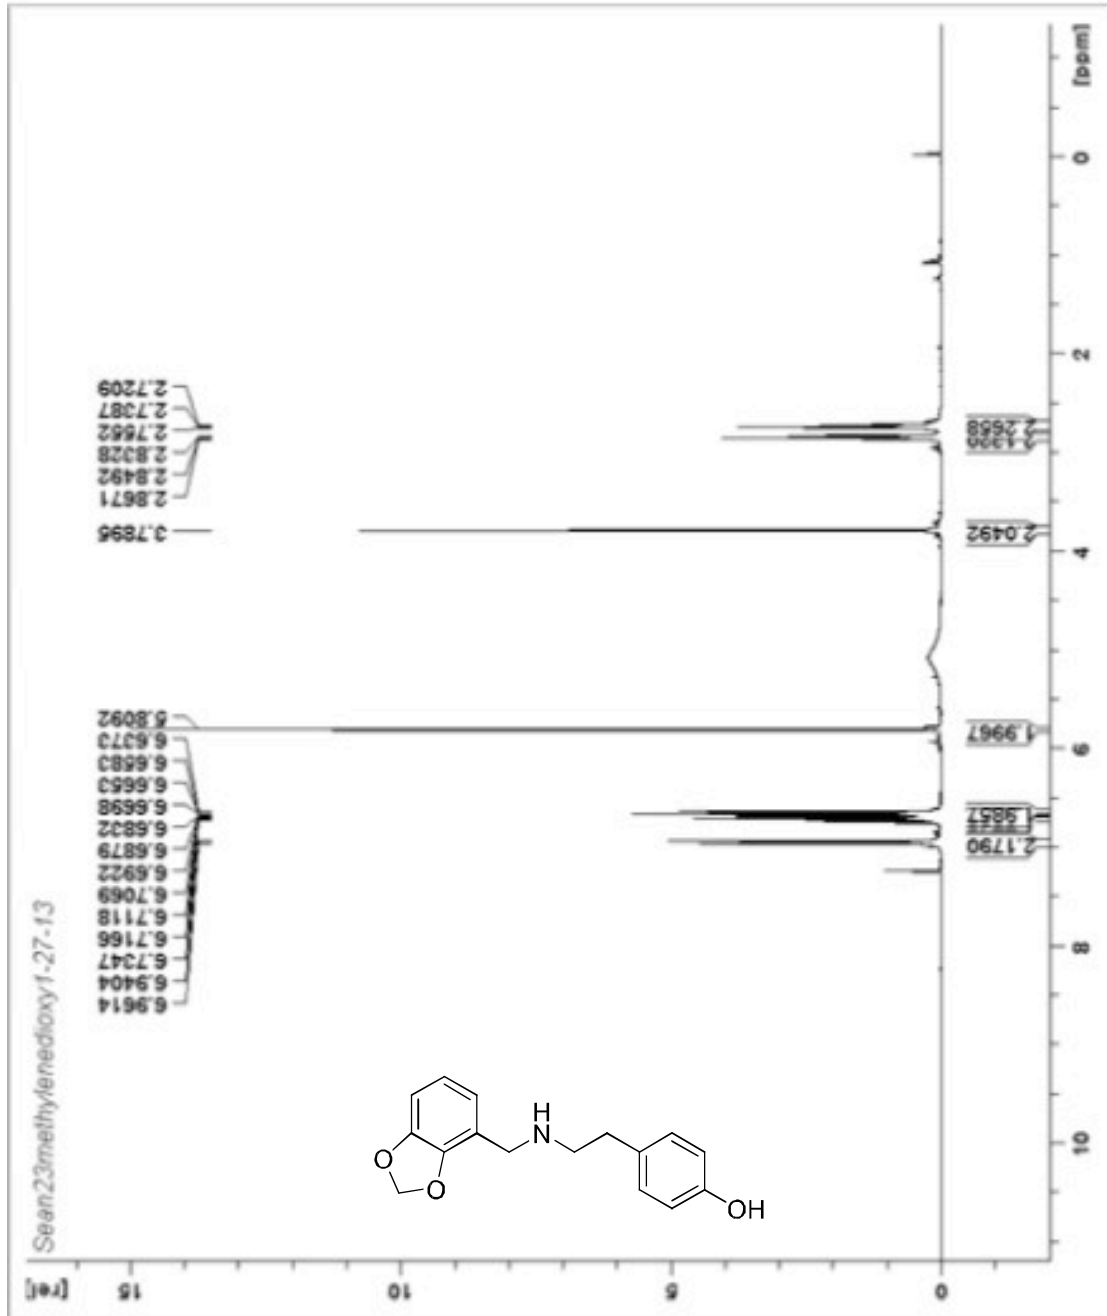



2d

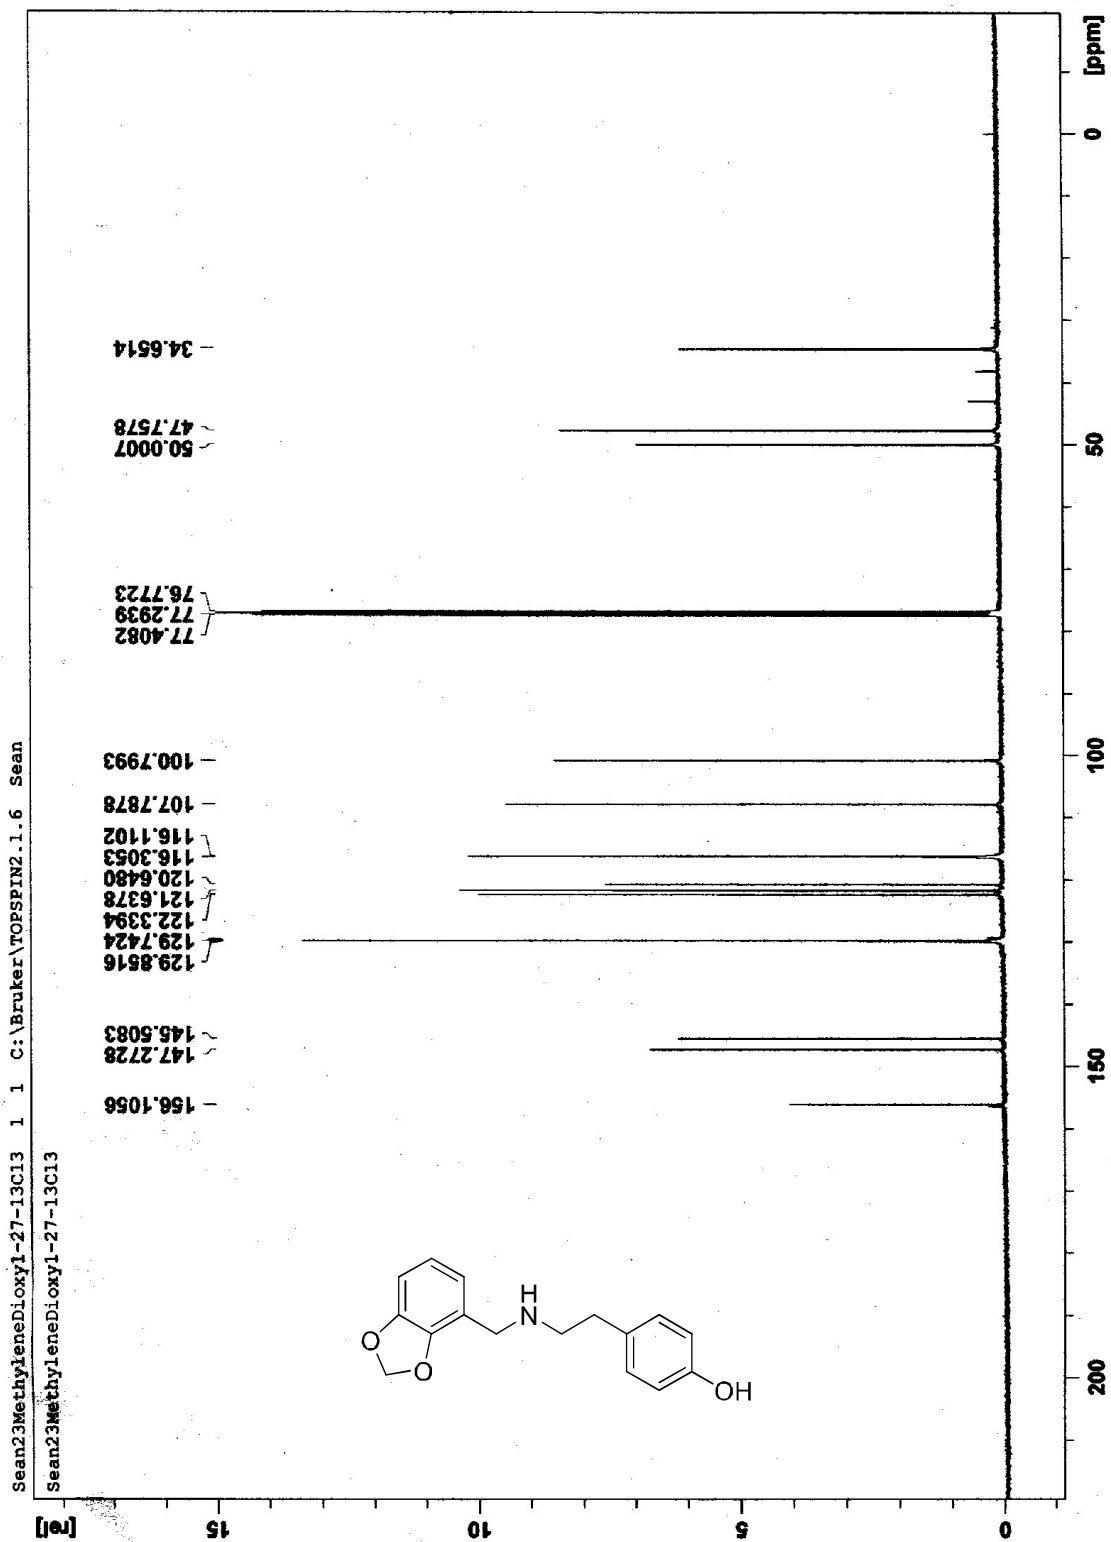

2f

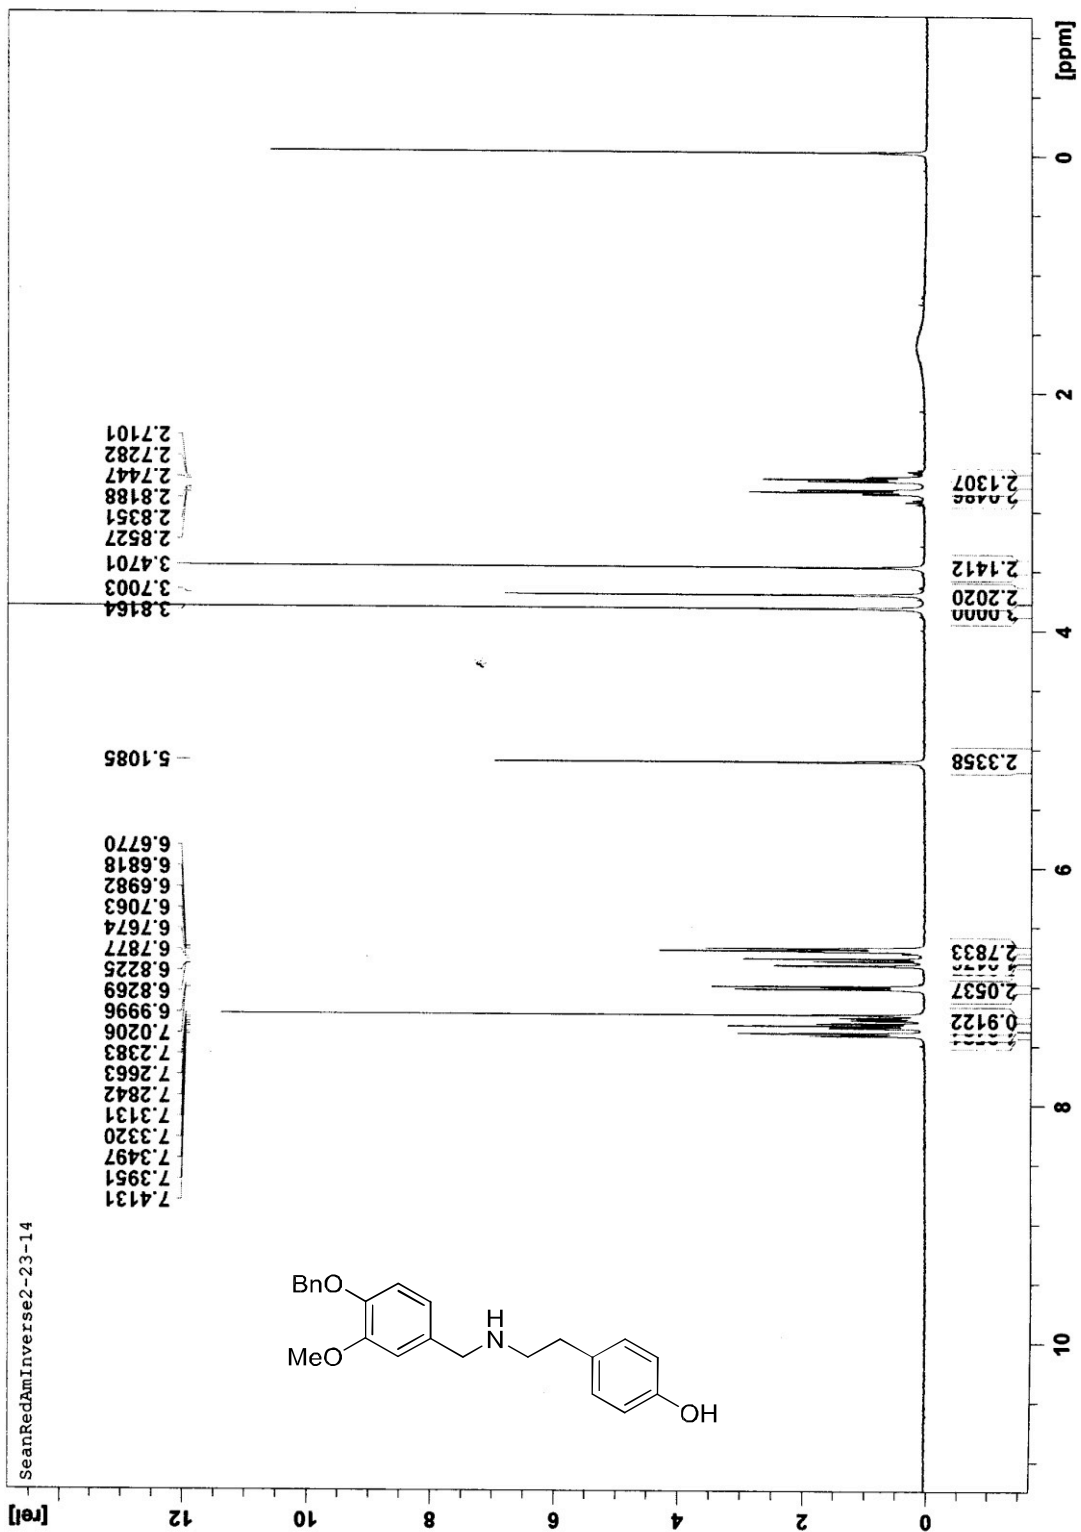

2f

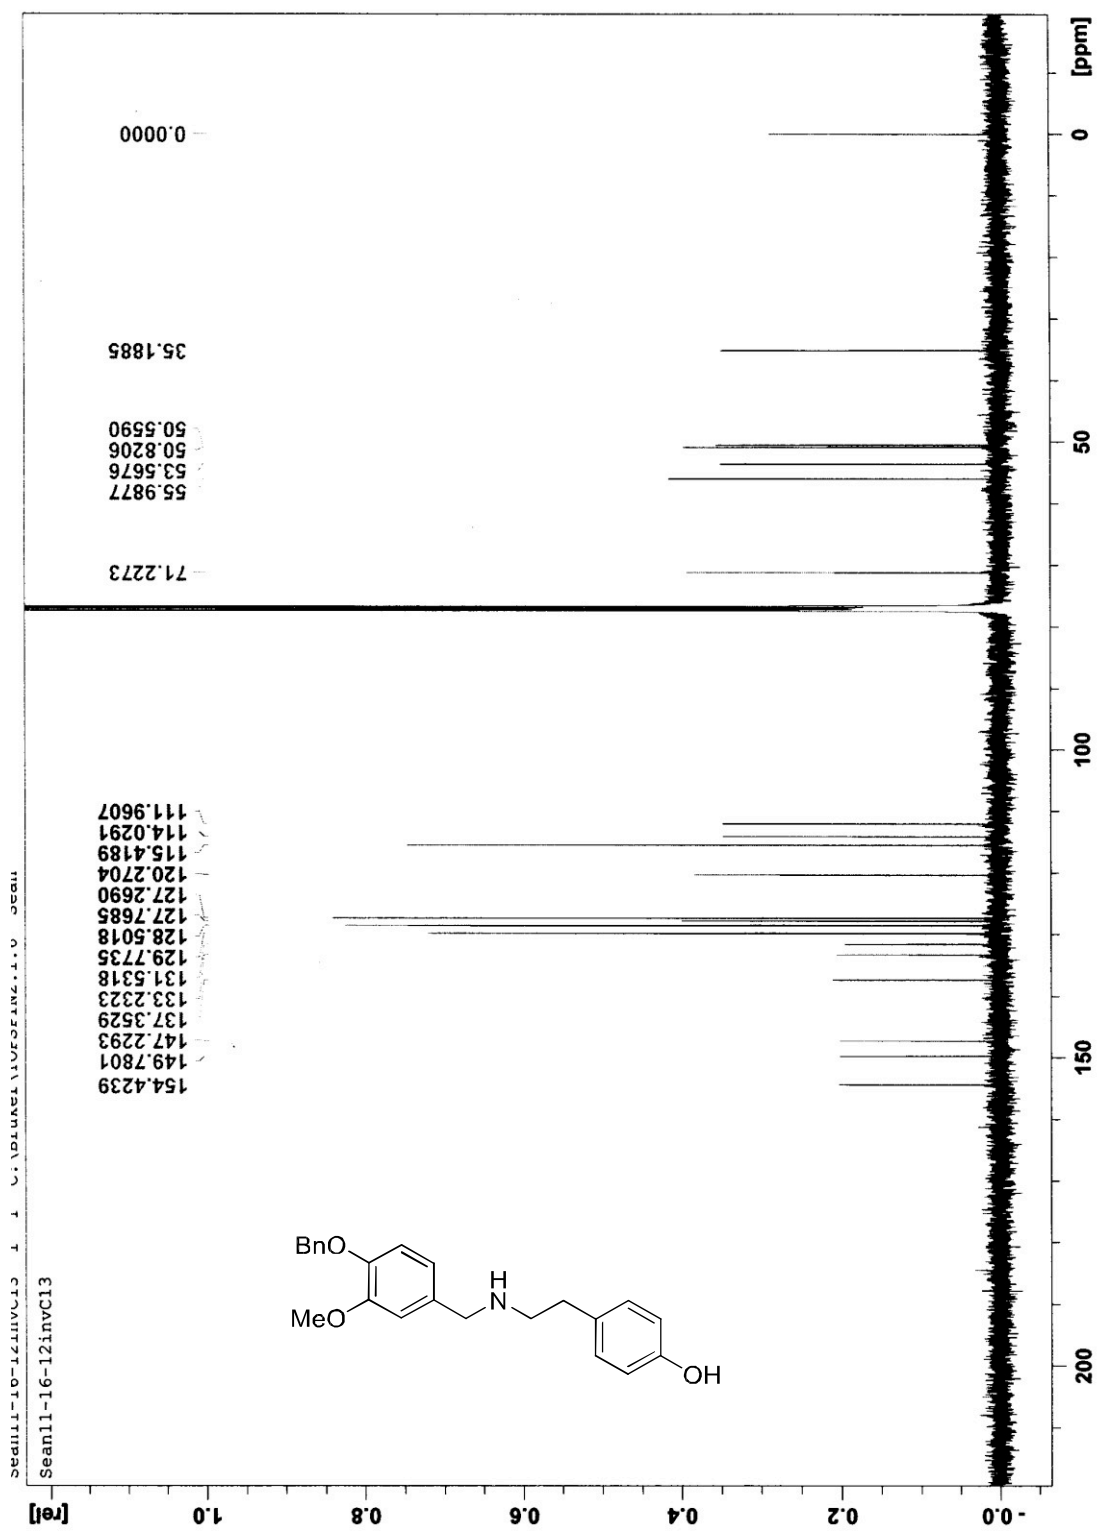

2h

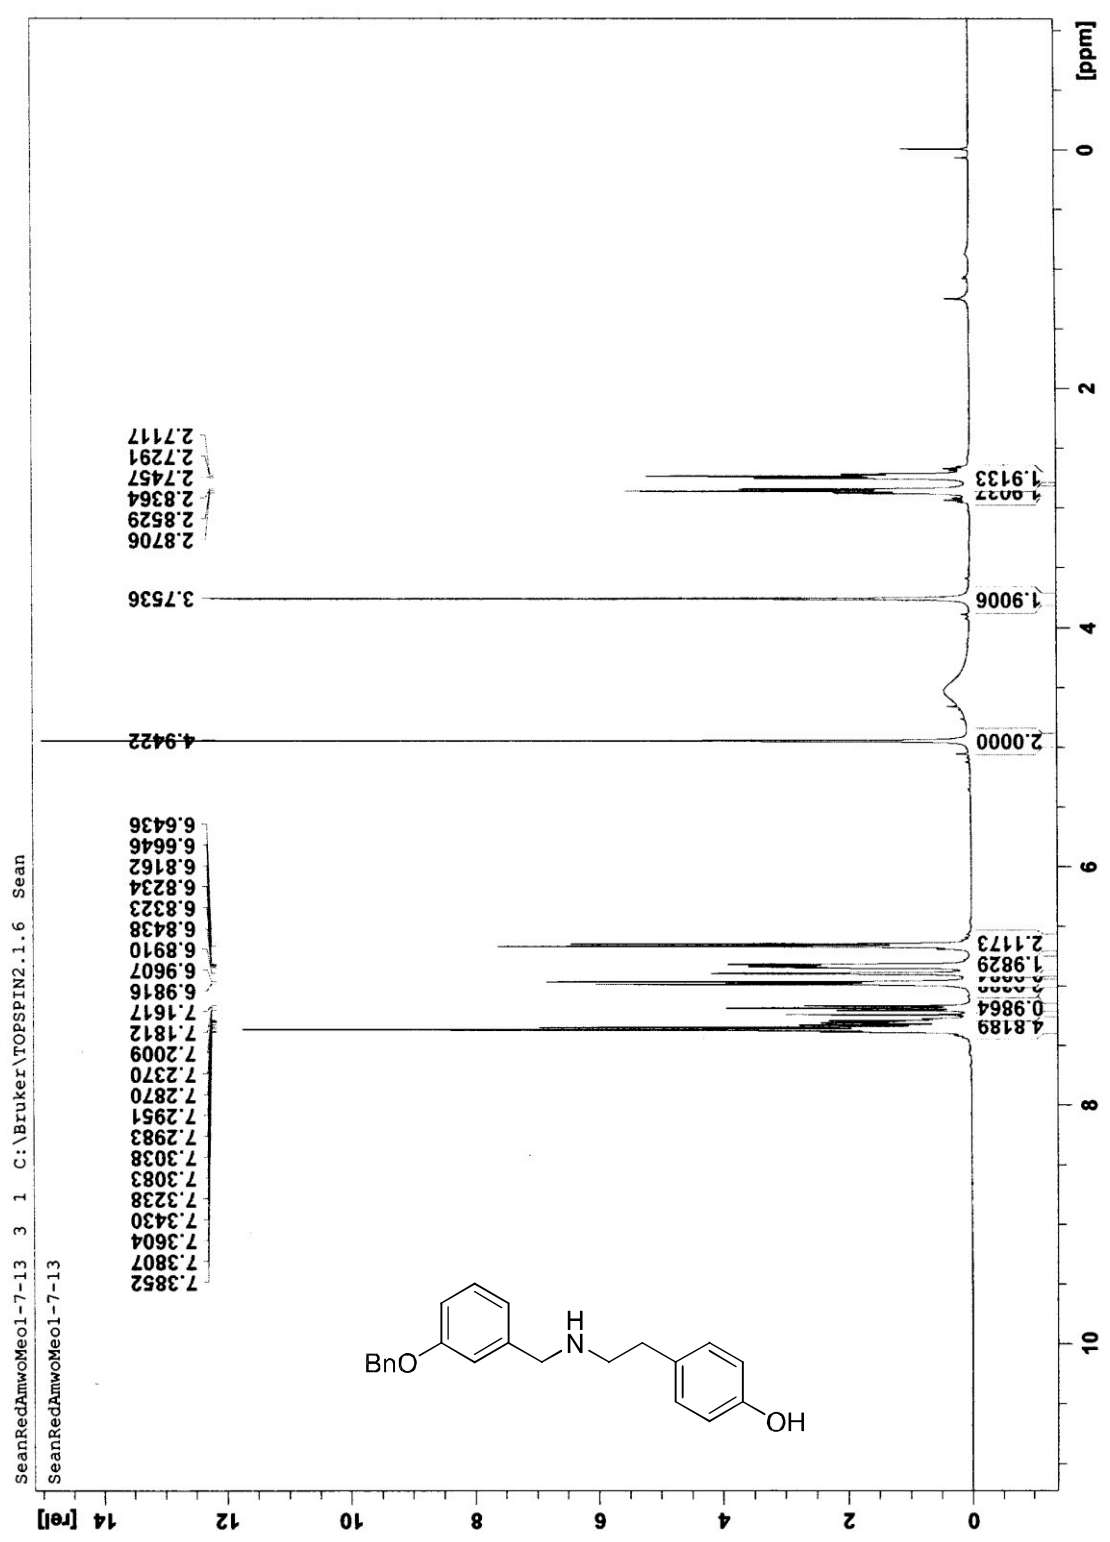

2h

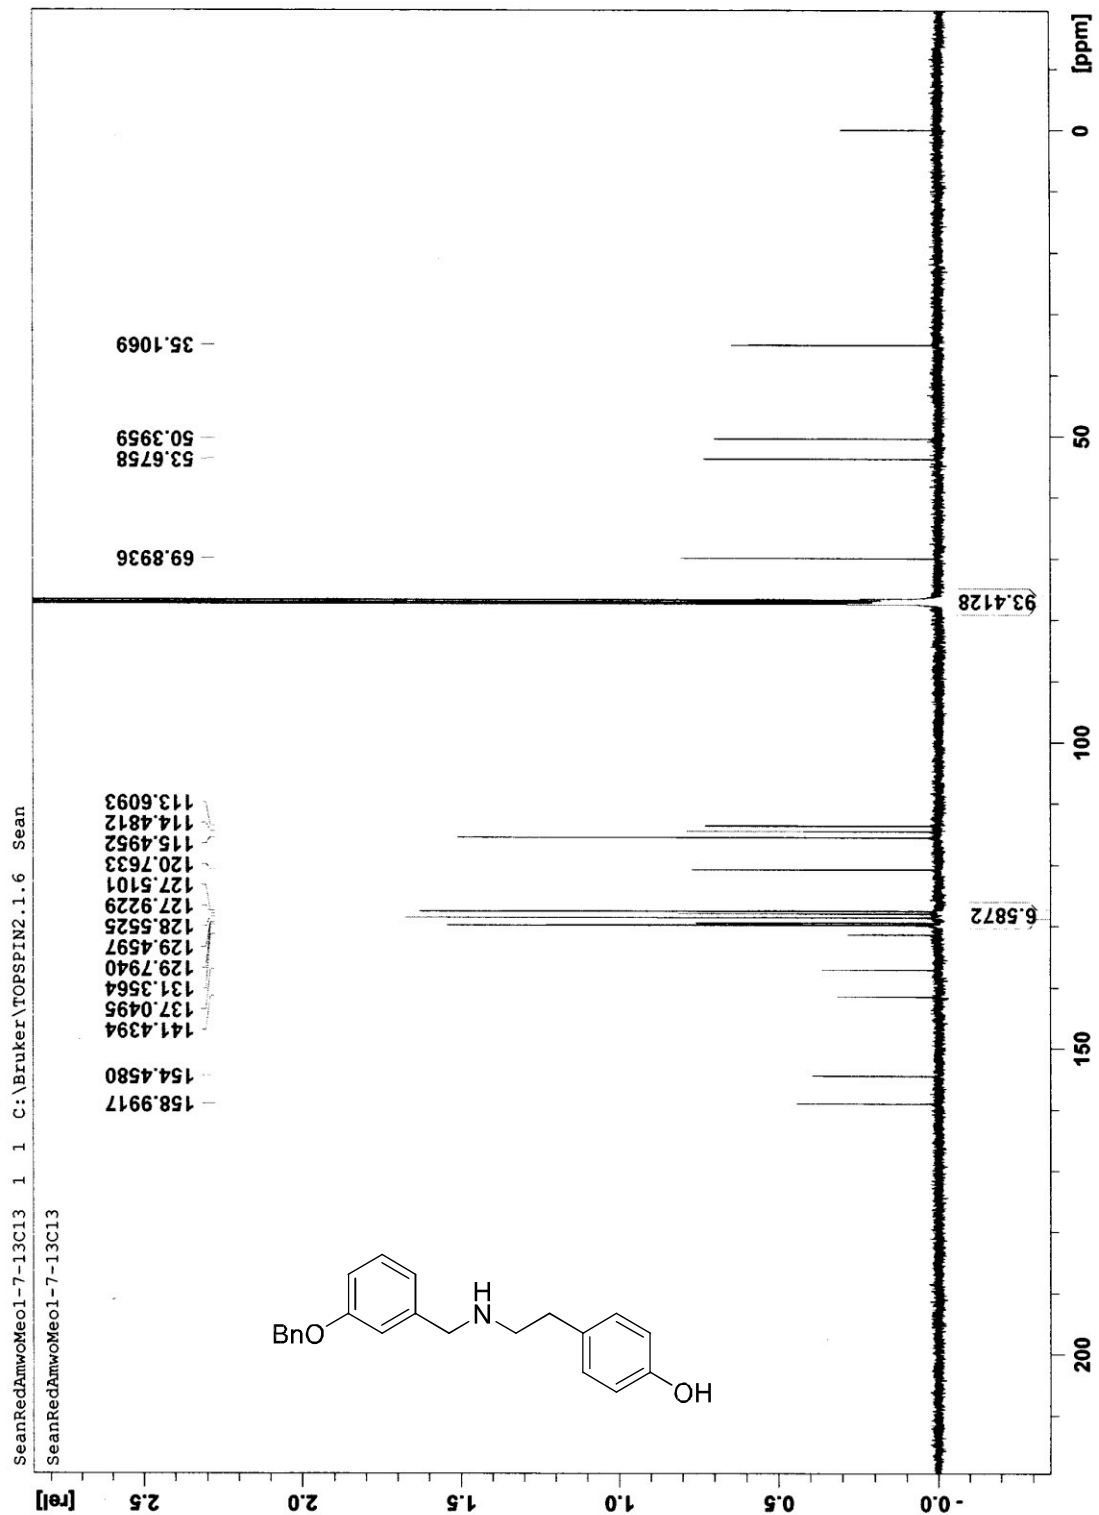

2j

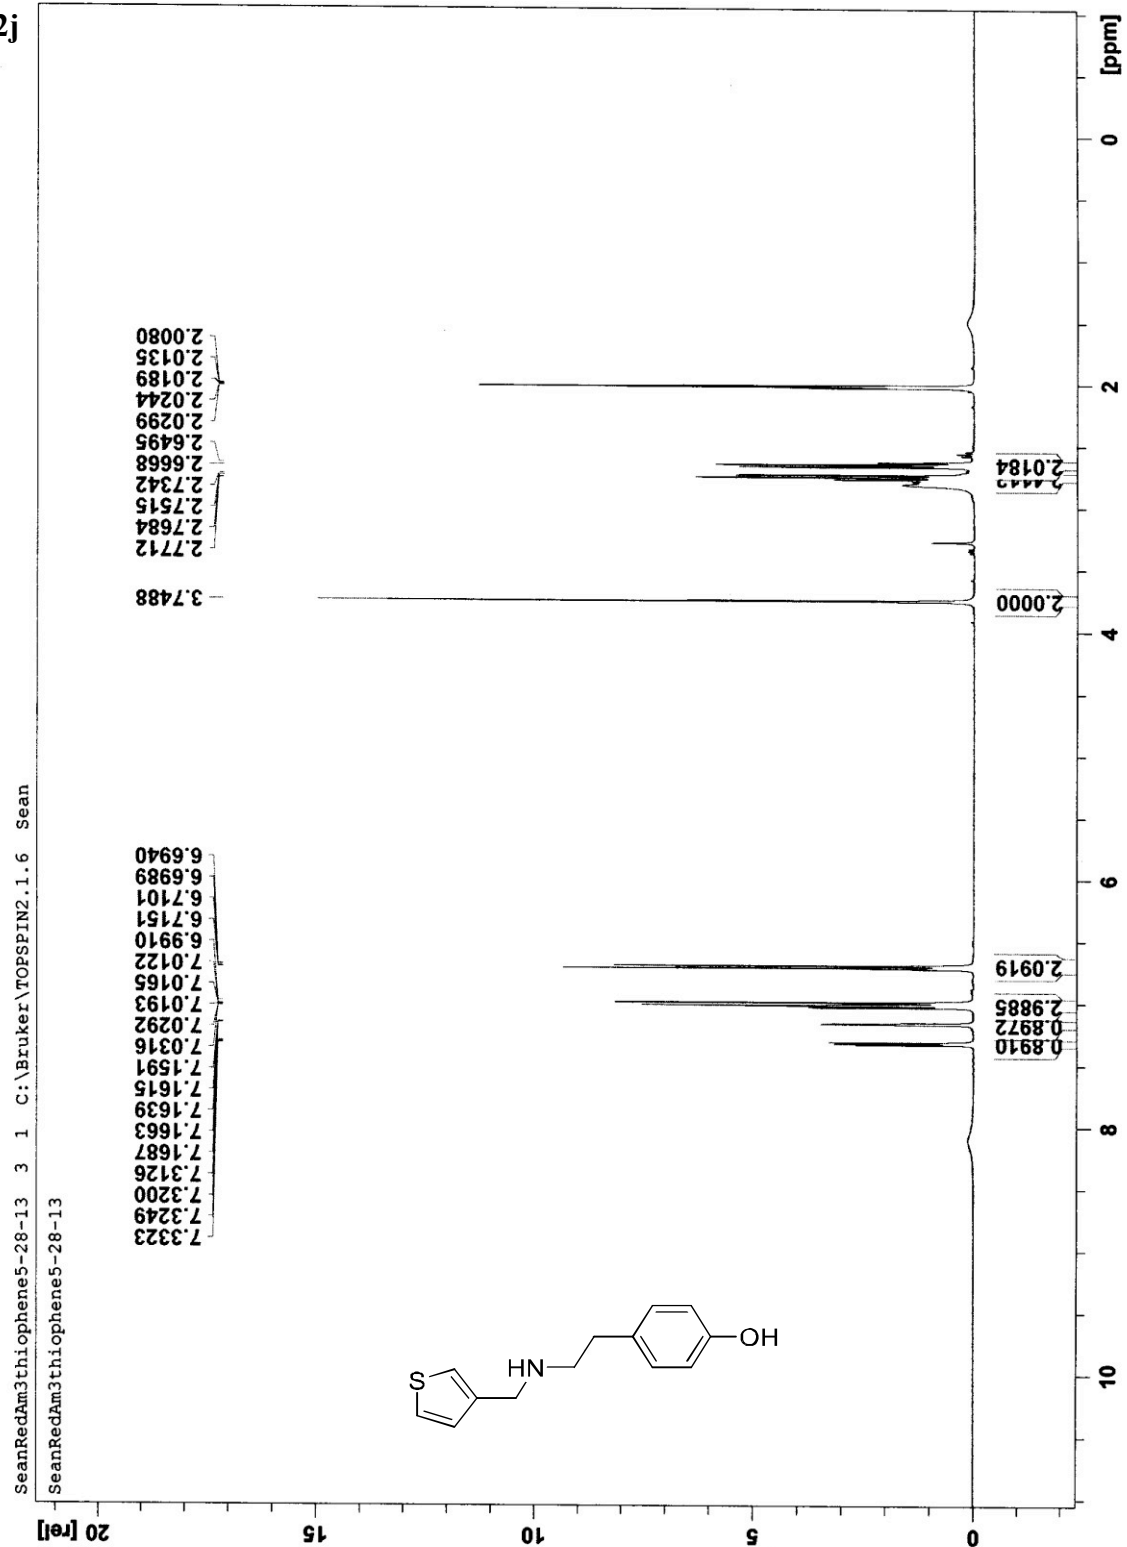

SeanRedAm3thiophene5-28-13 3 1 C:\Bruker\TOPSPIN2.1.6 Sean  
SeanRedAm3thiophene5-28-13

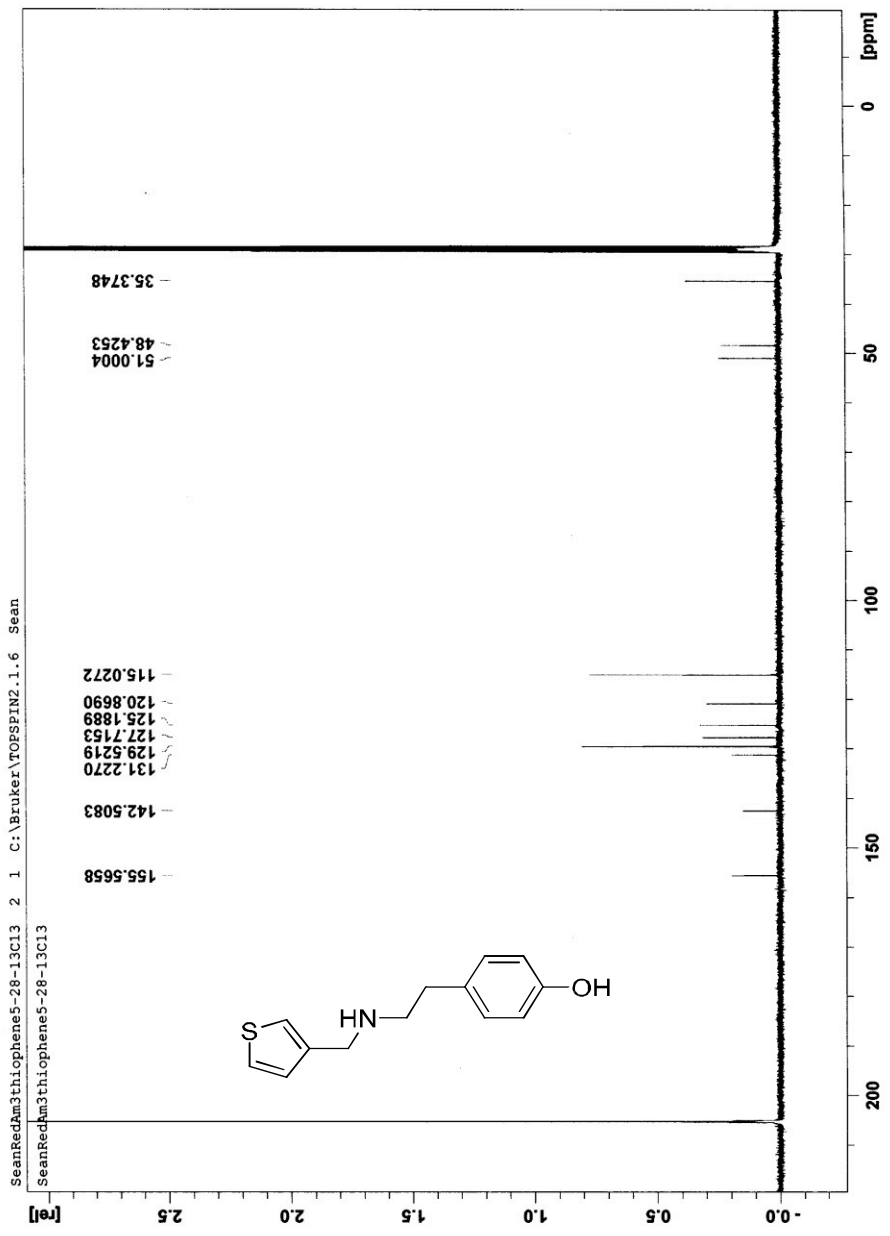

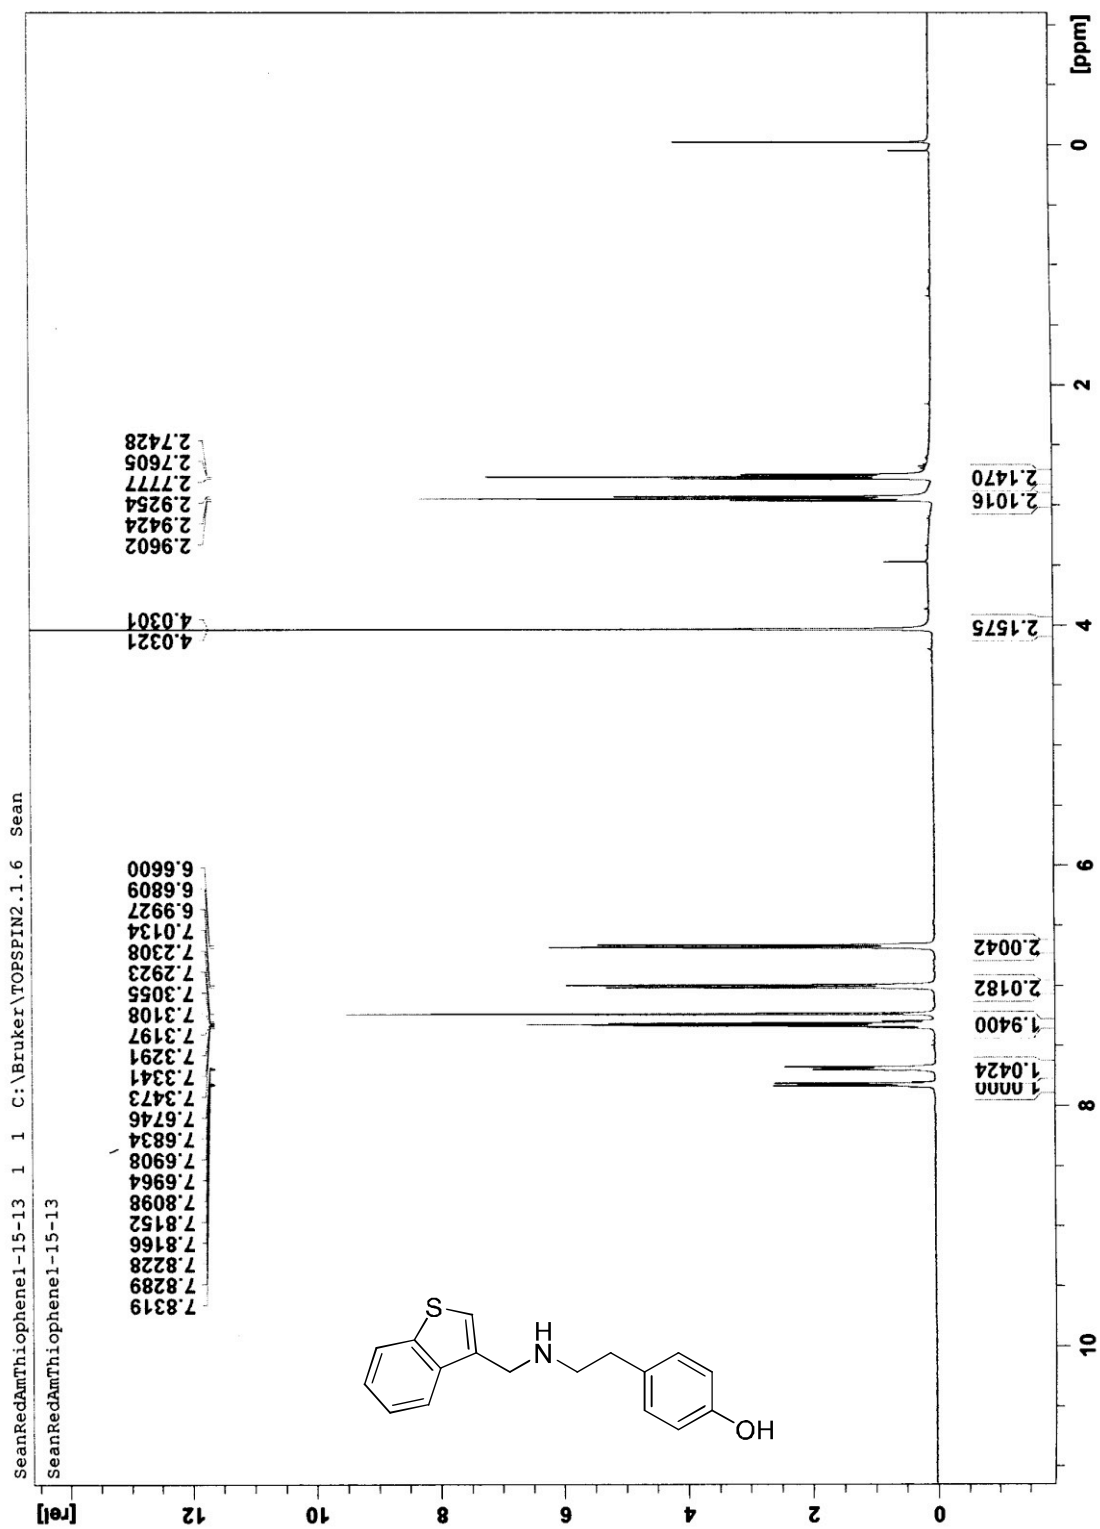



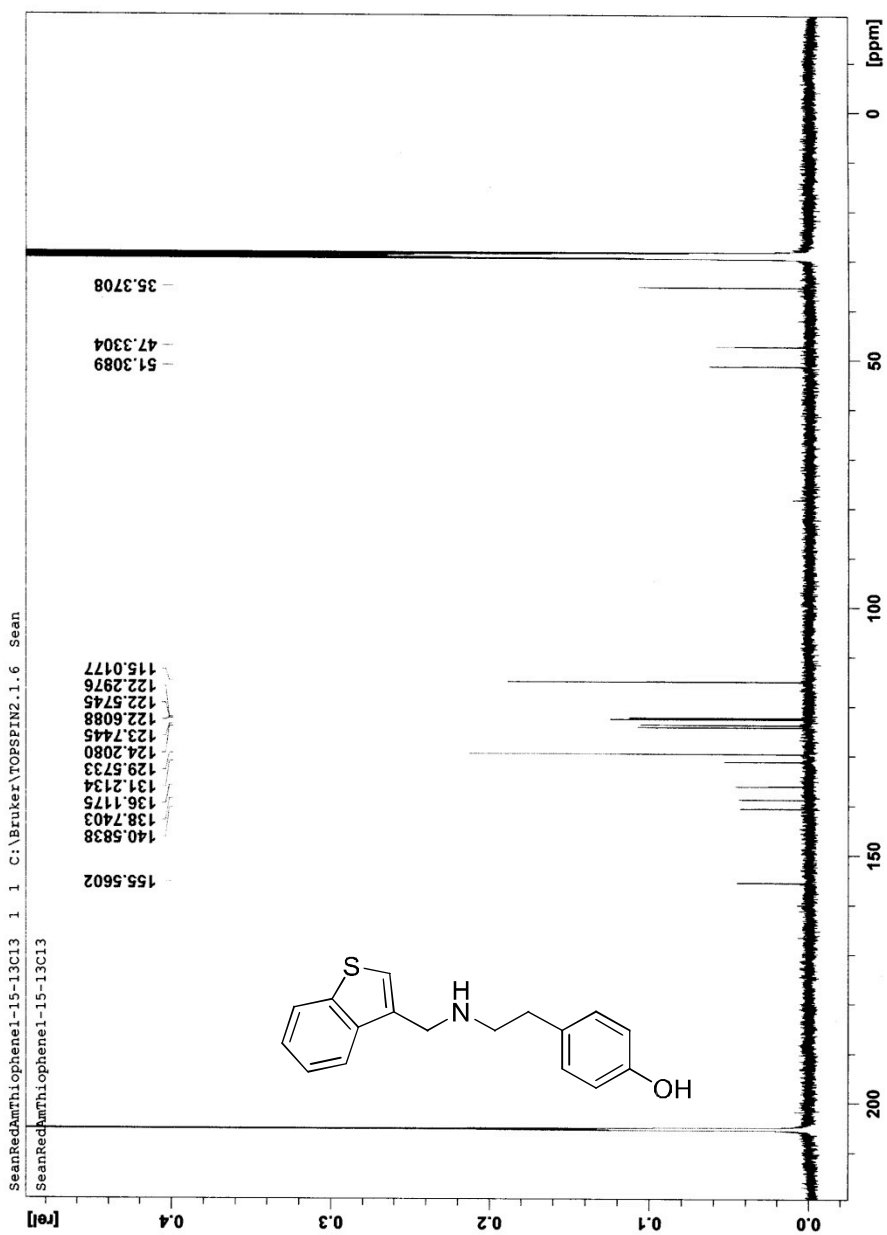

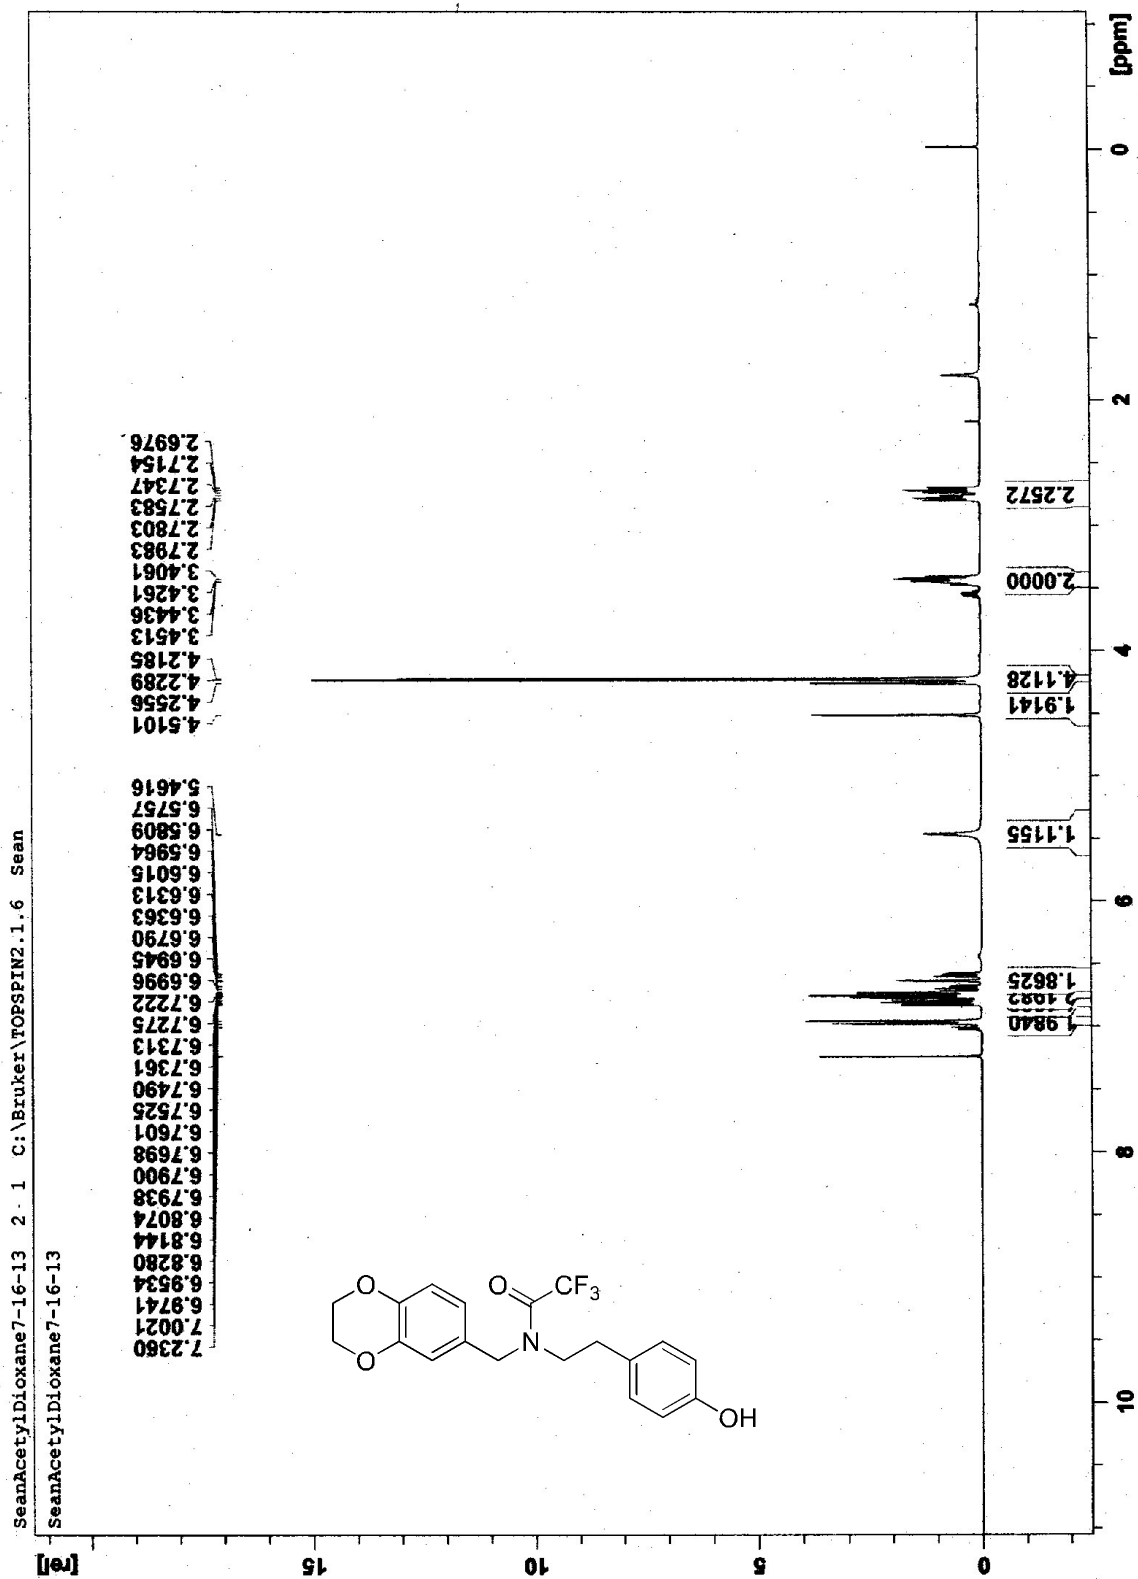

3c

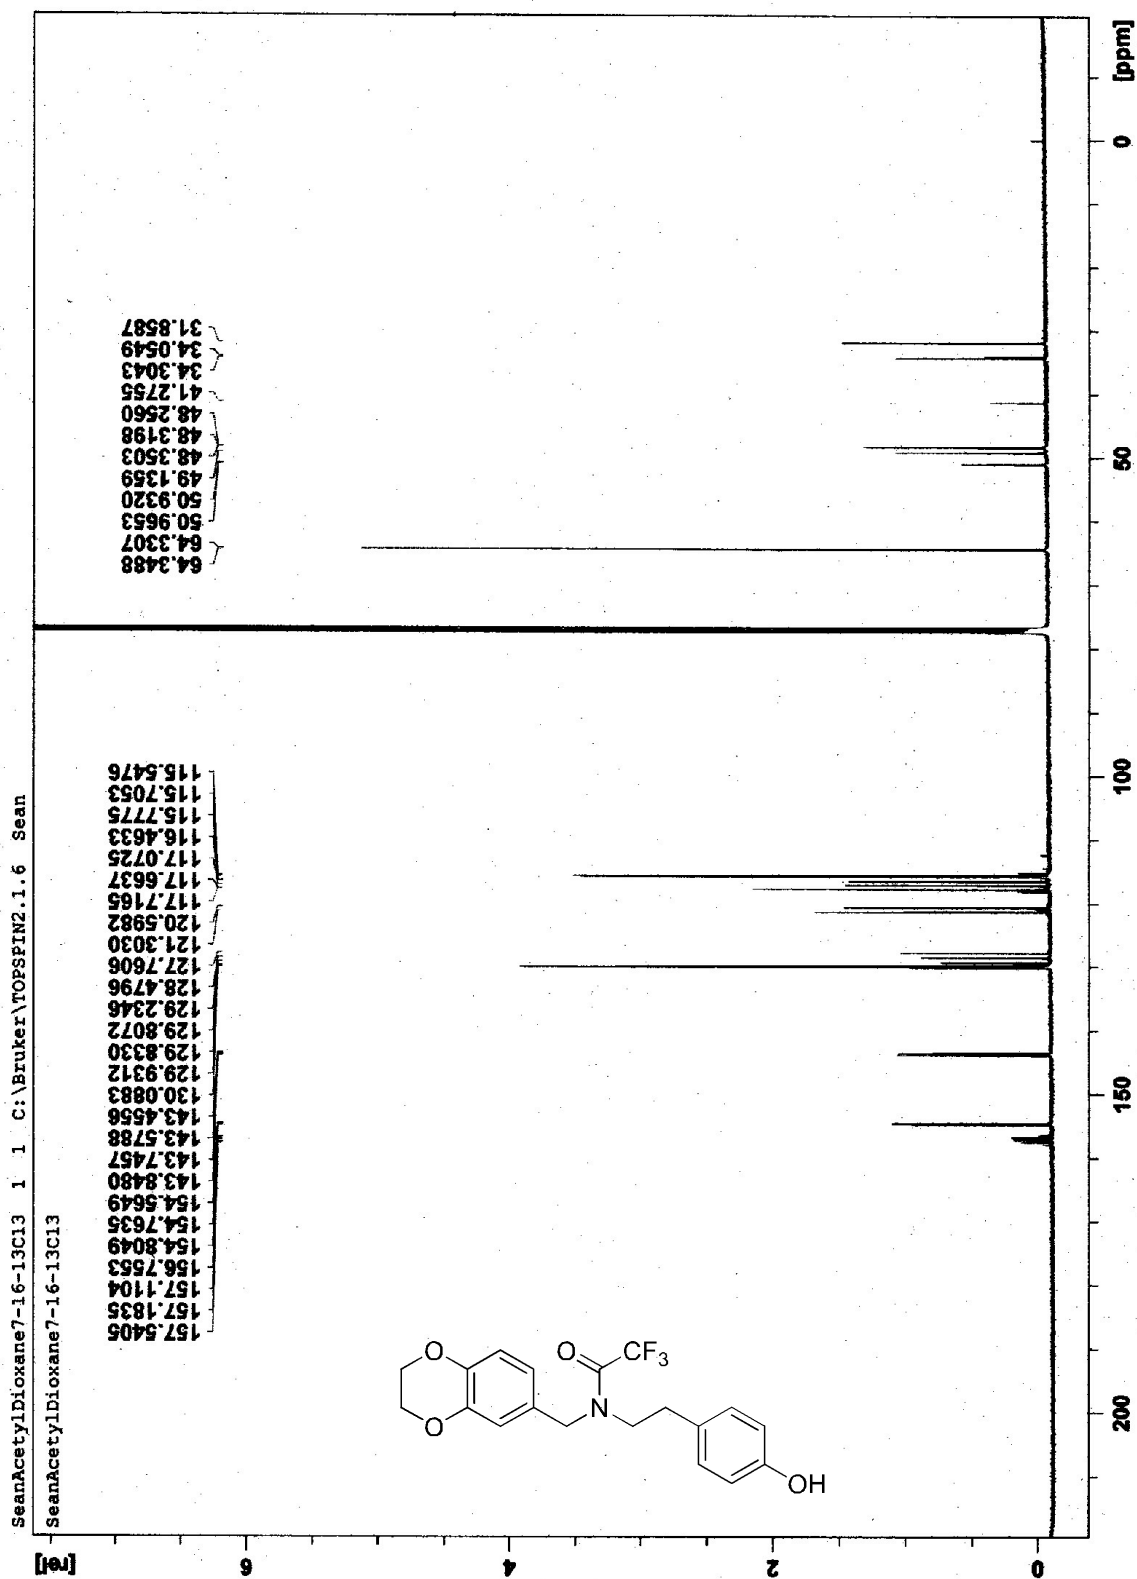

3d

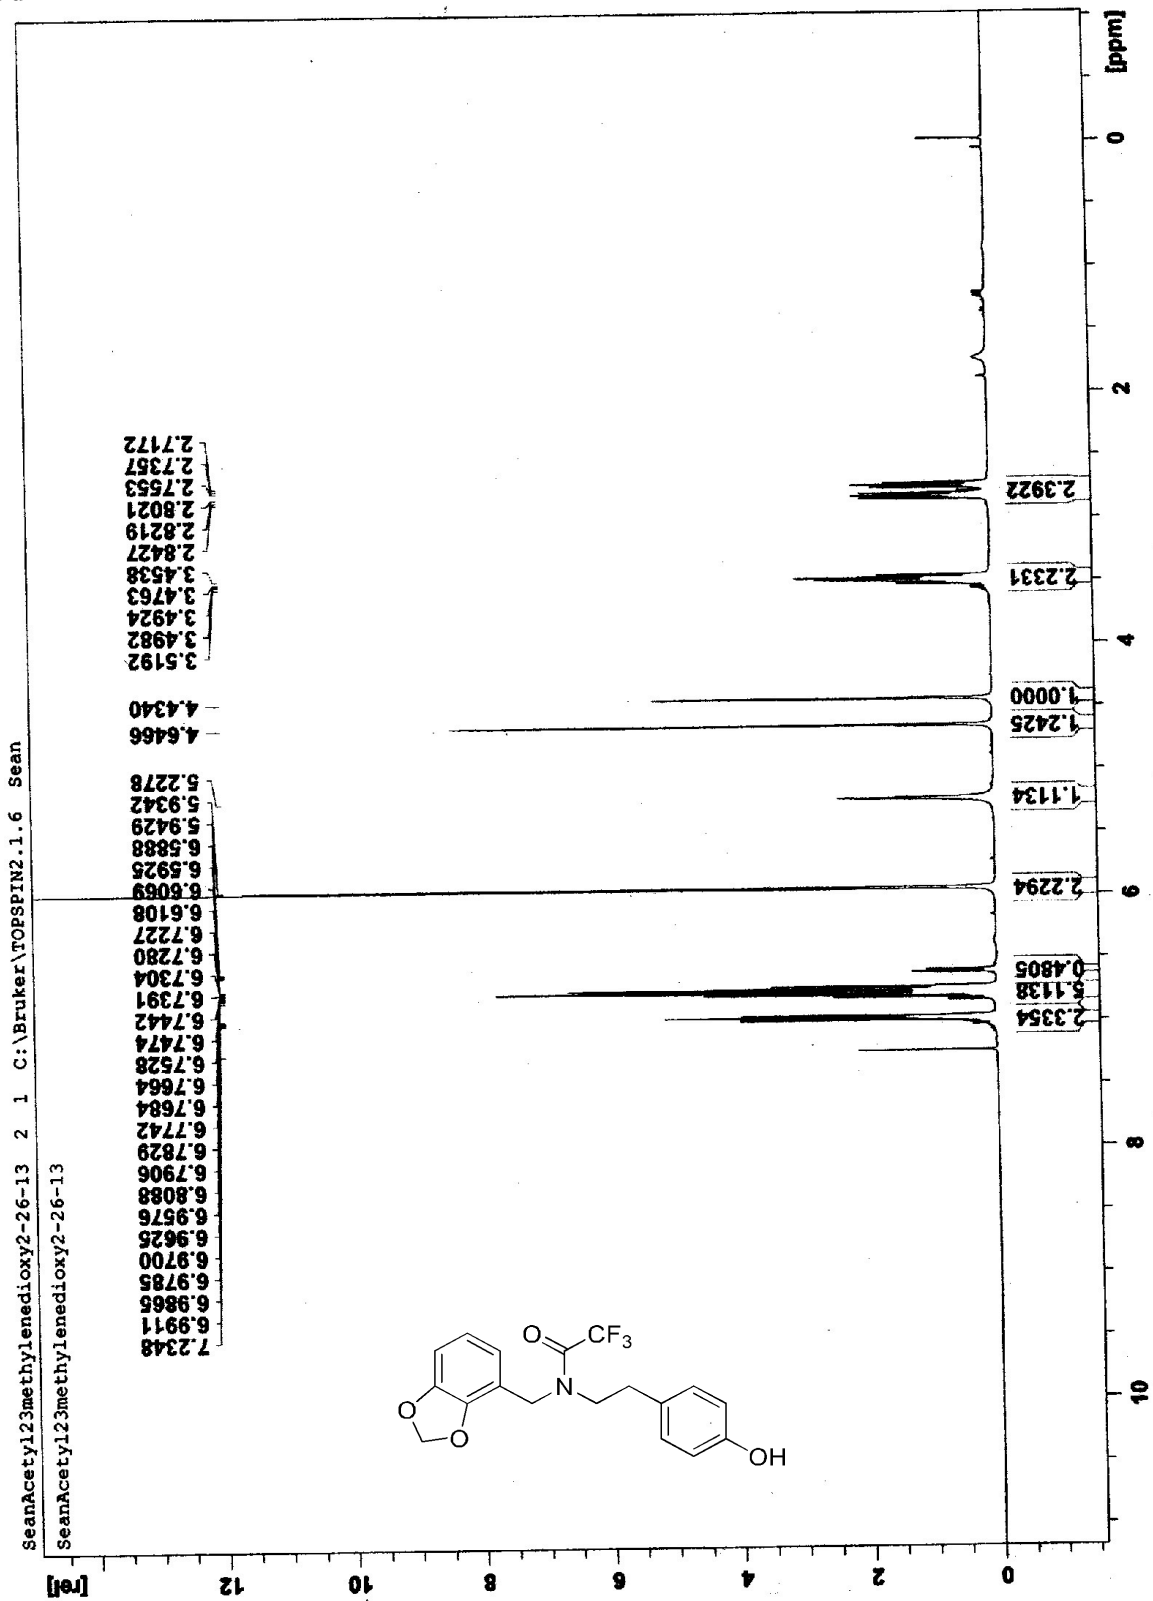

3d

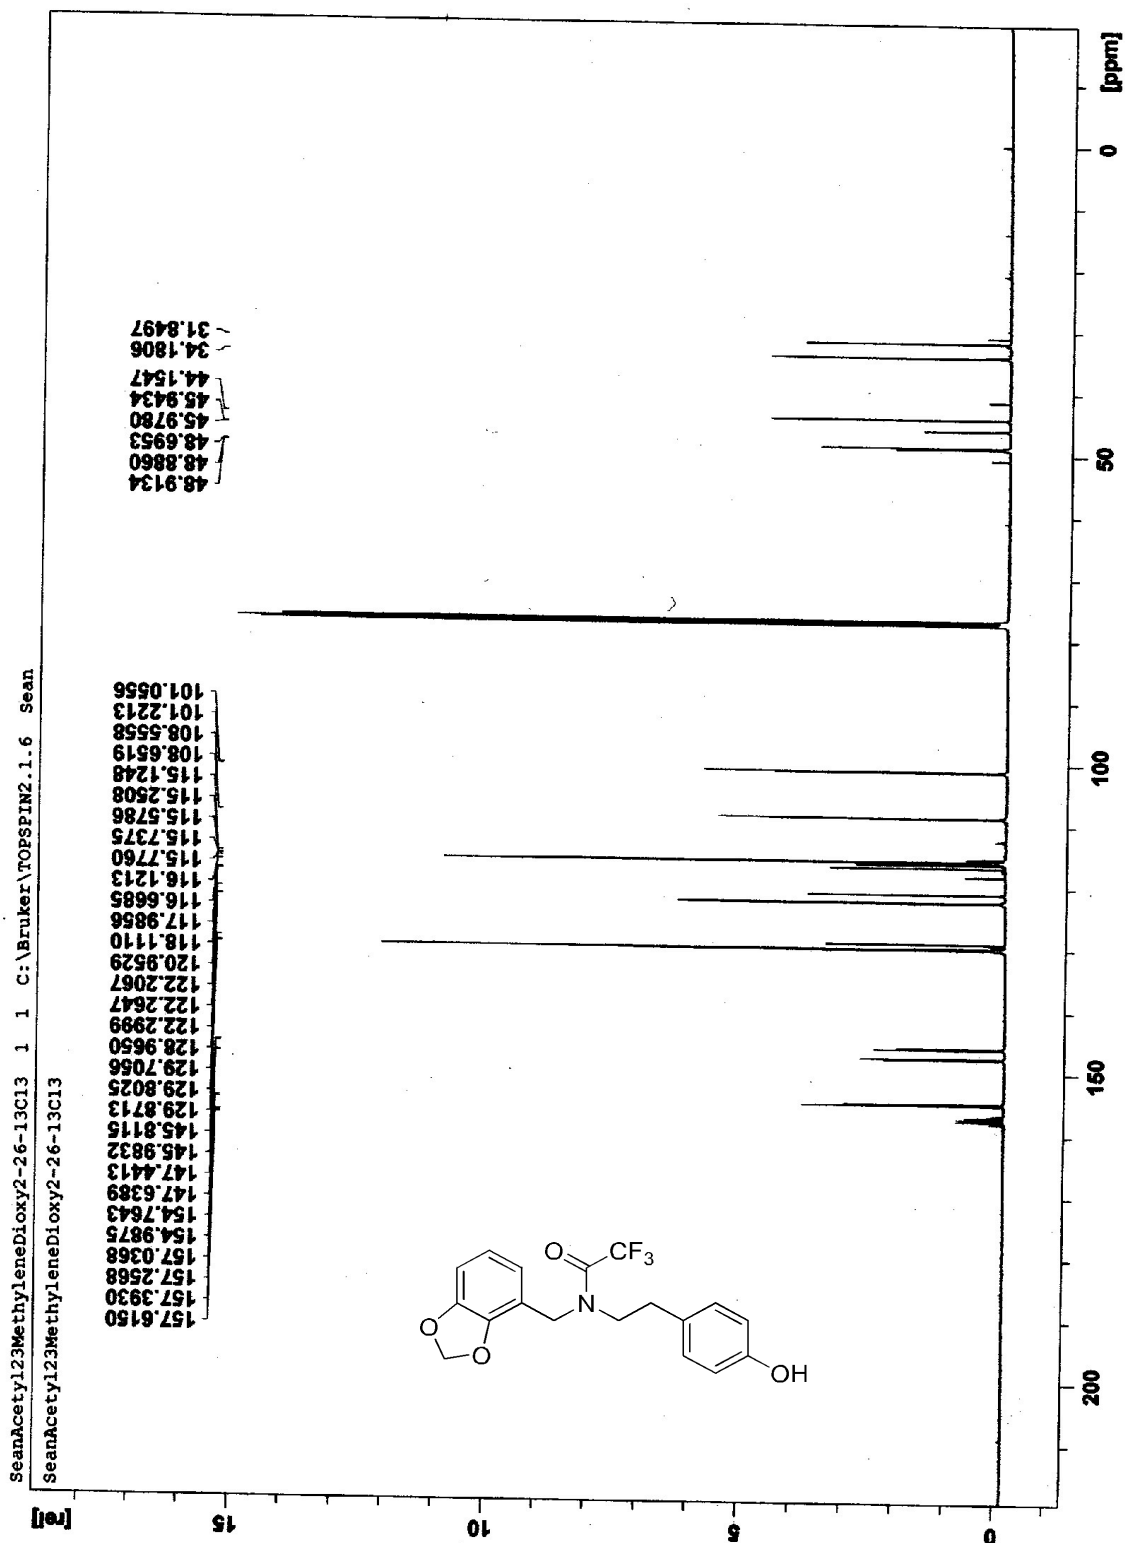

3f

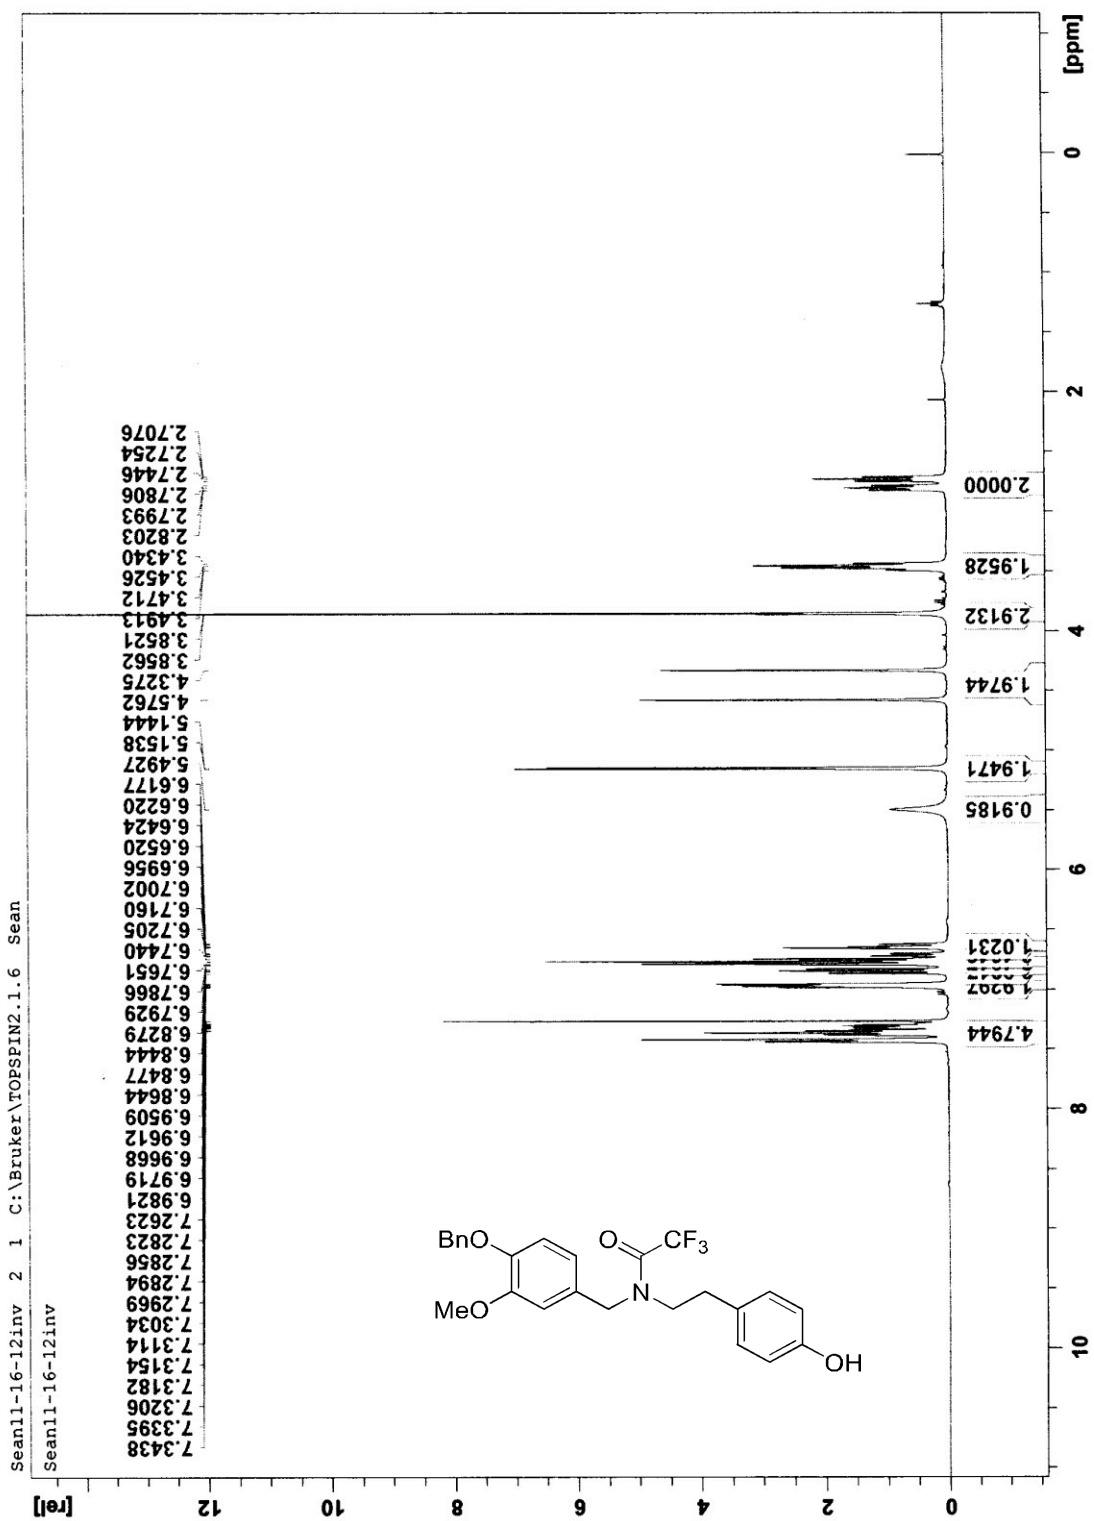

3f

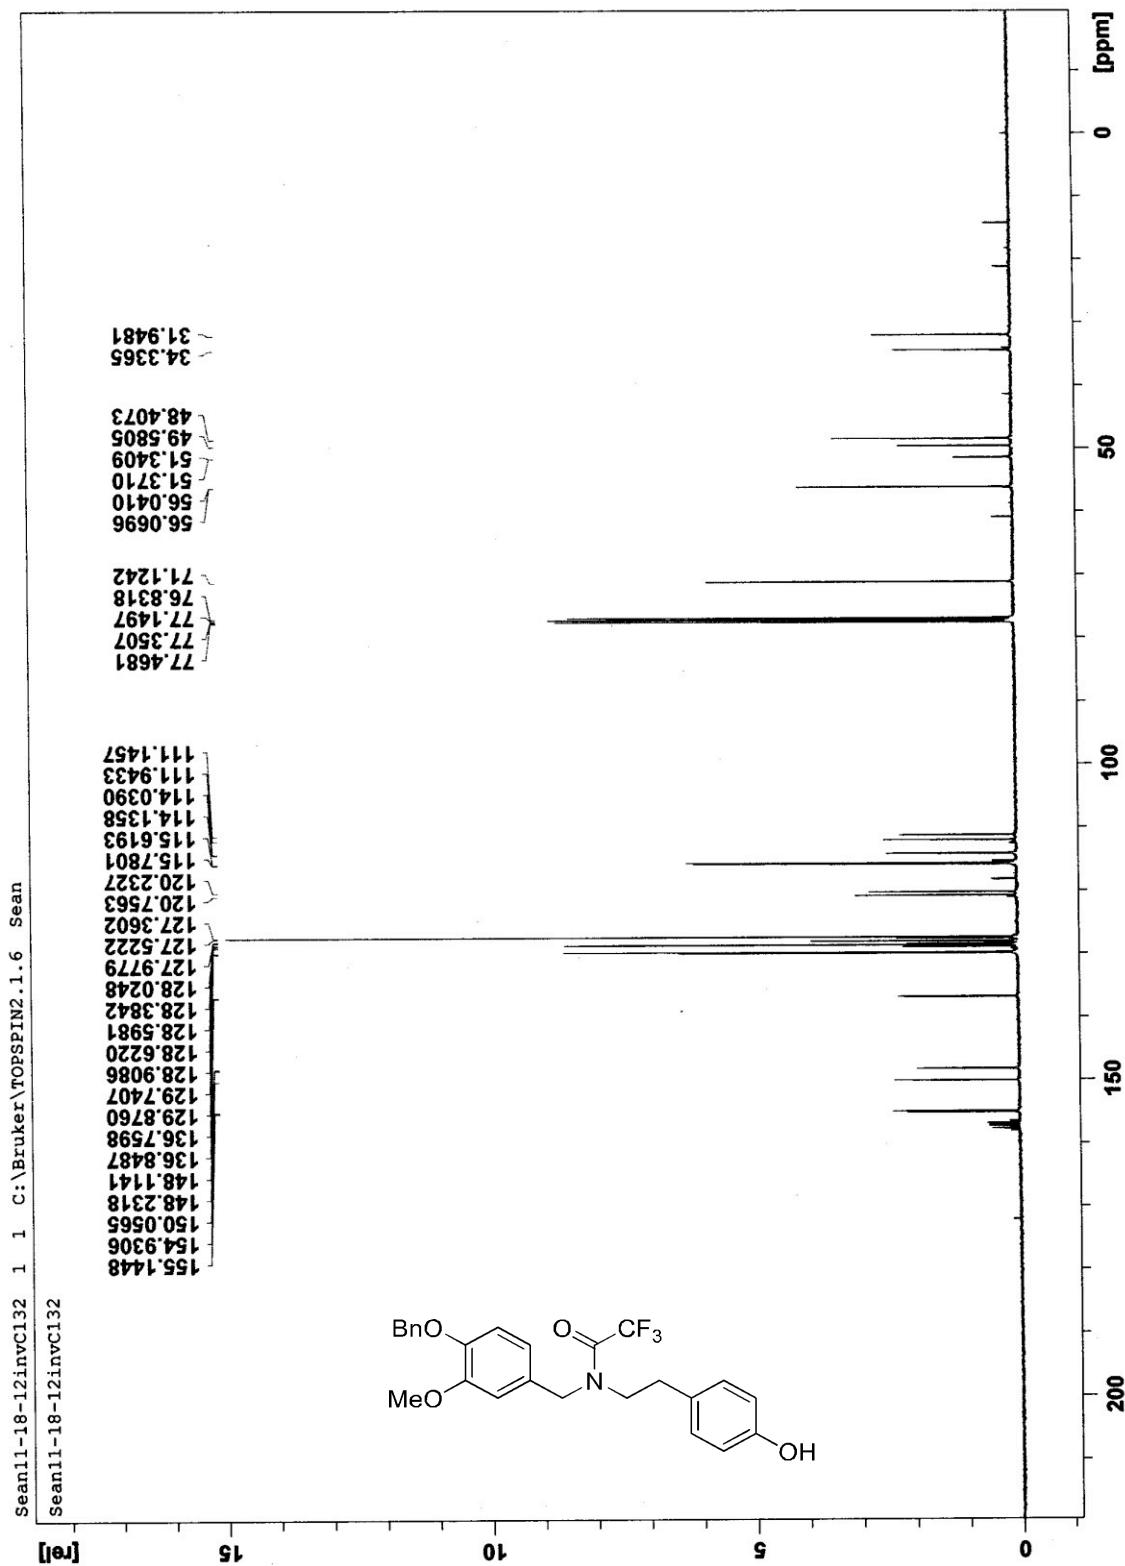

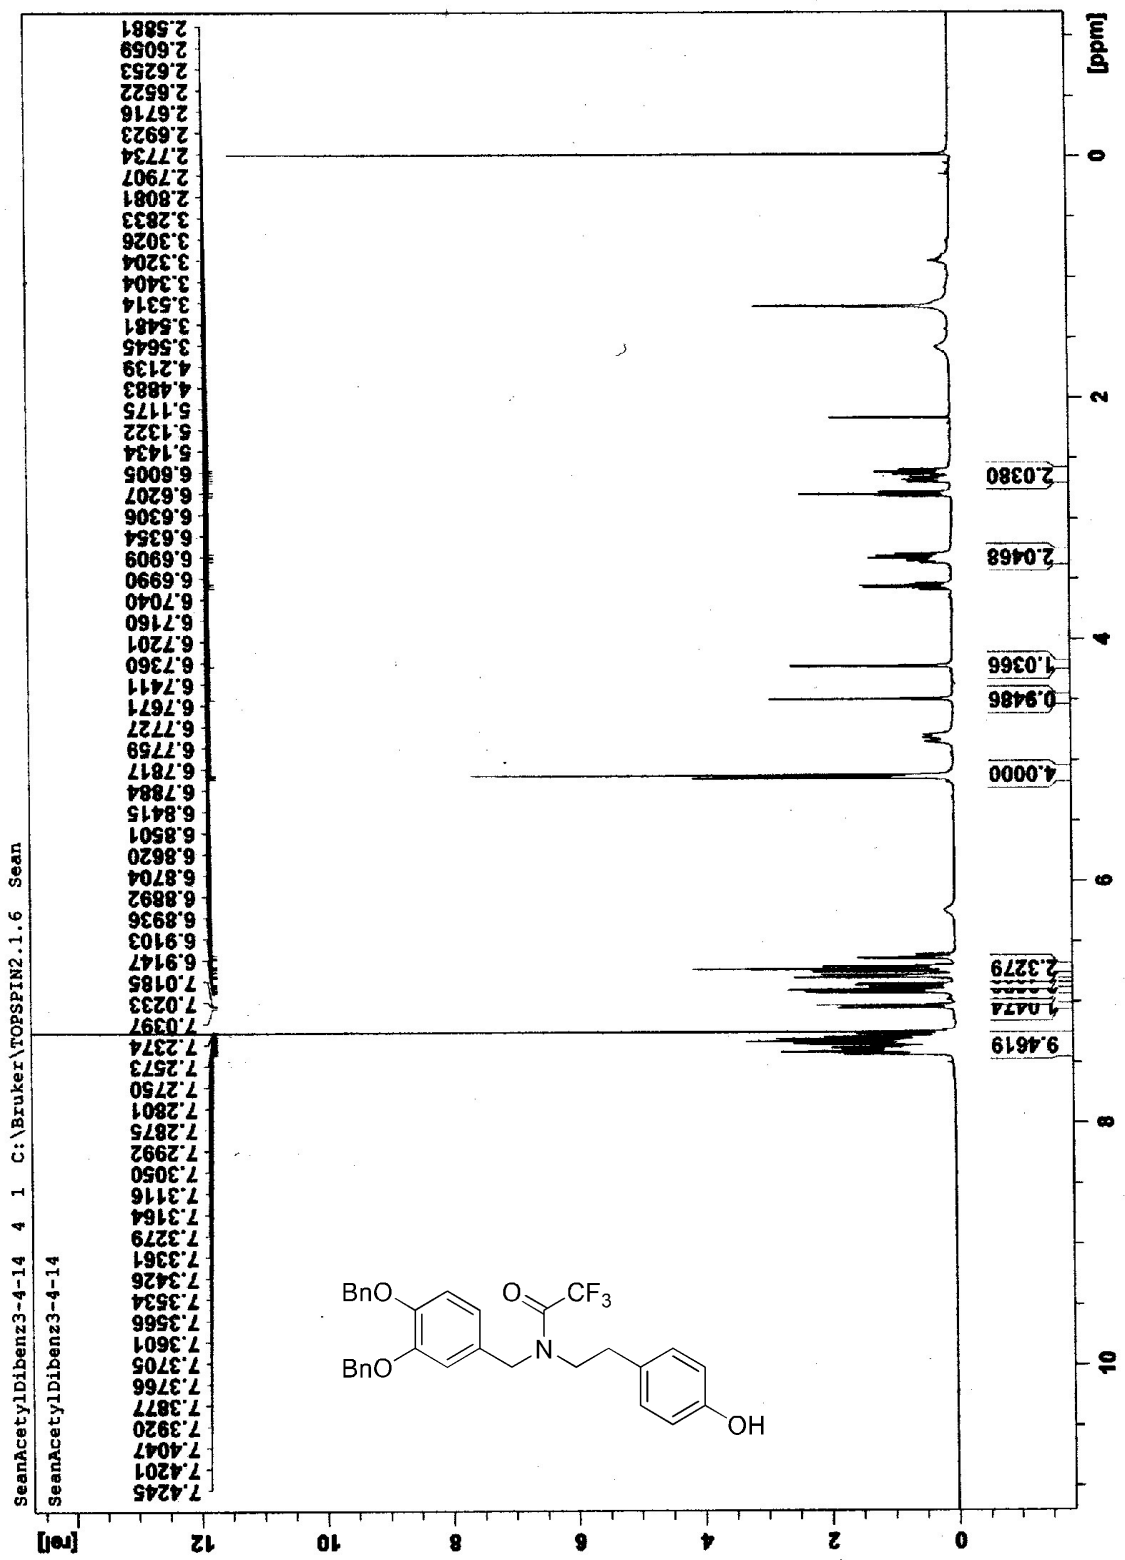



3g

SeanAcetylDibenz3-4-14C13 2 1 C:\Bruker\TOPSPIN2.1.6 Sean  
SeanAcetylDibenz3-4-14C13

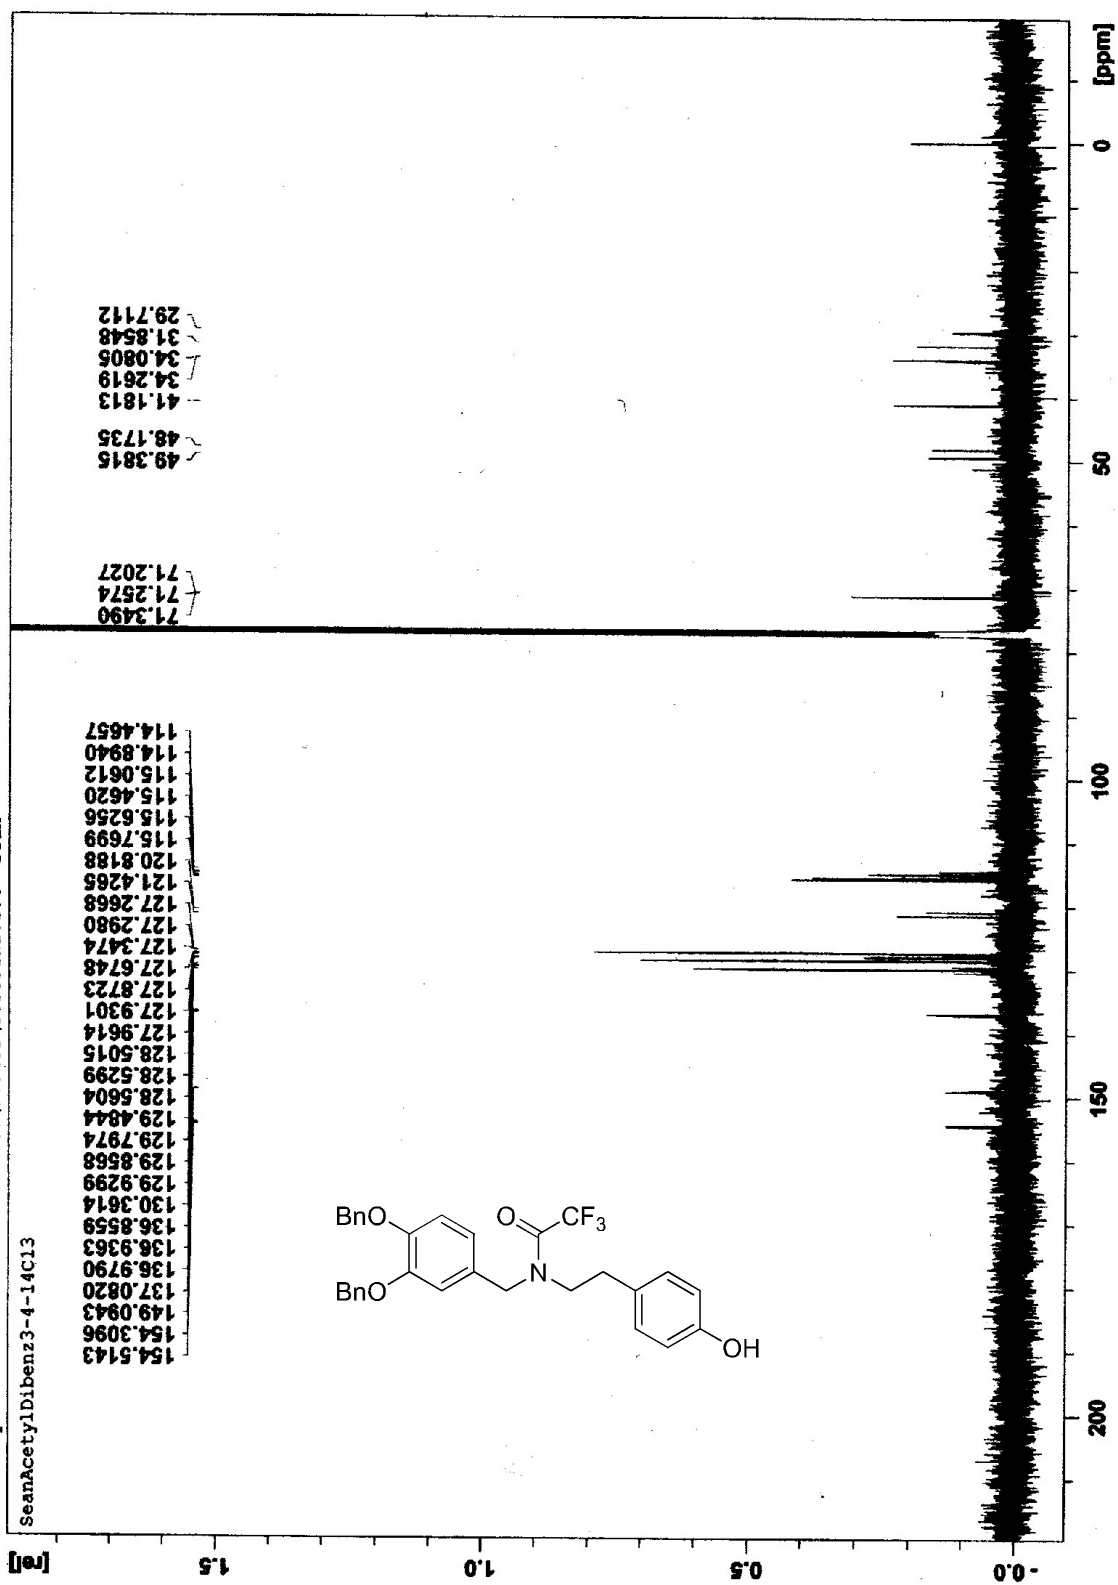

3h

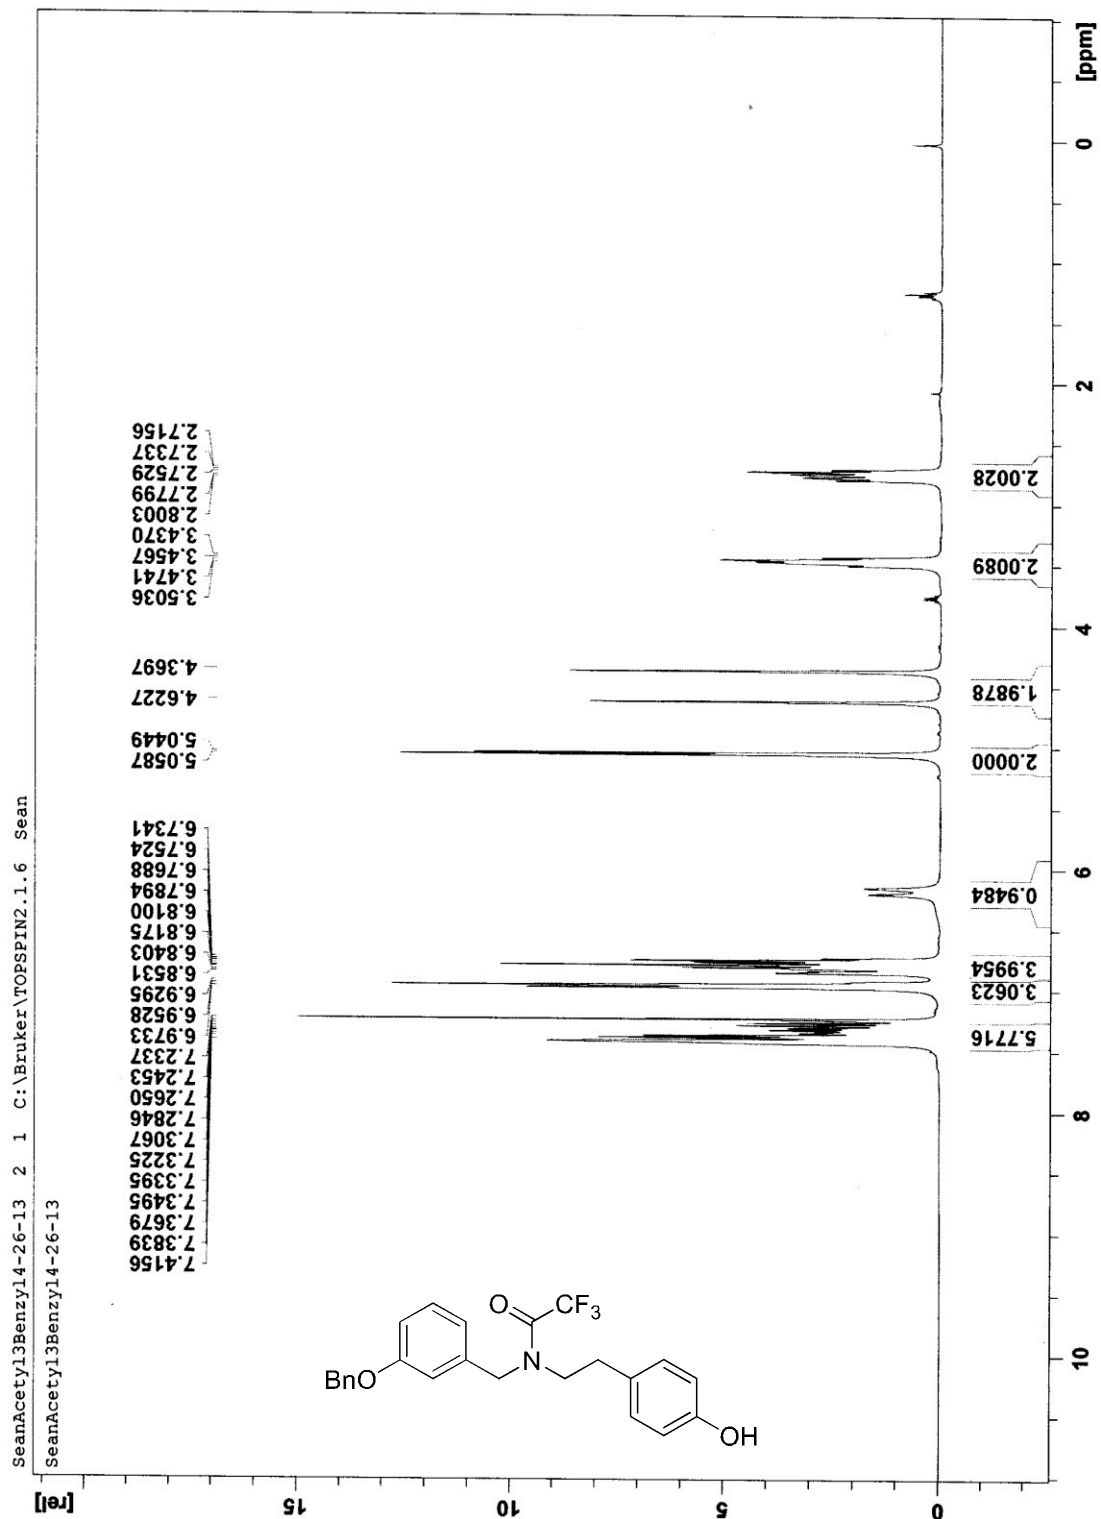

3h

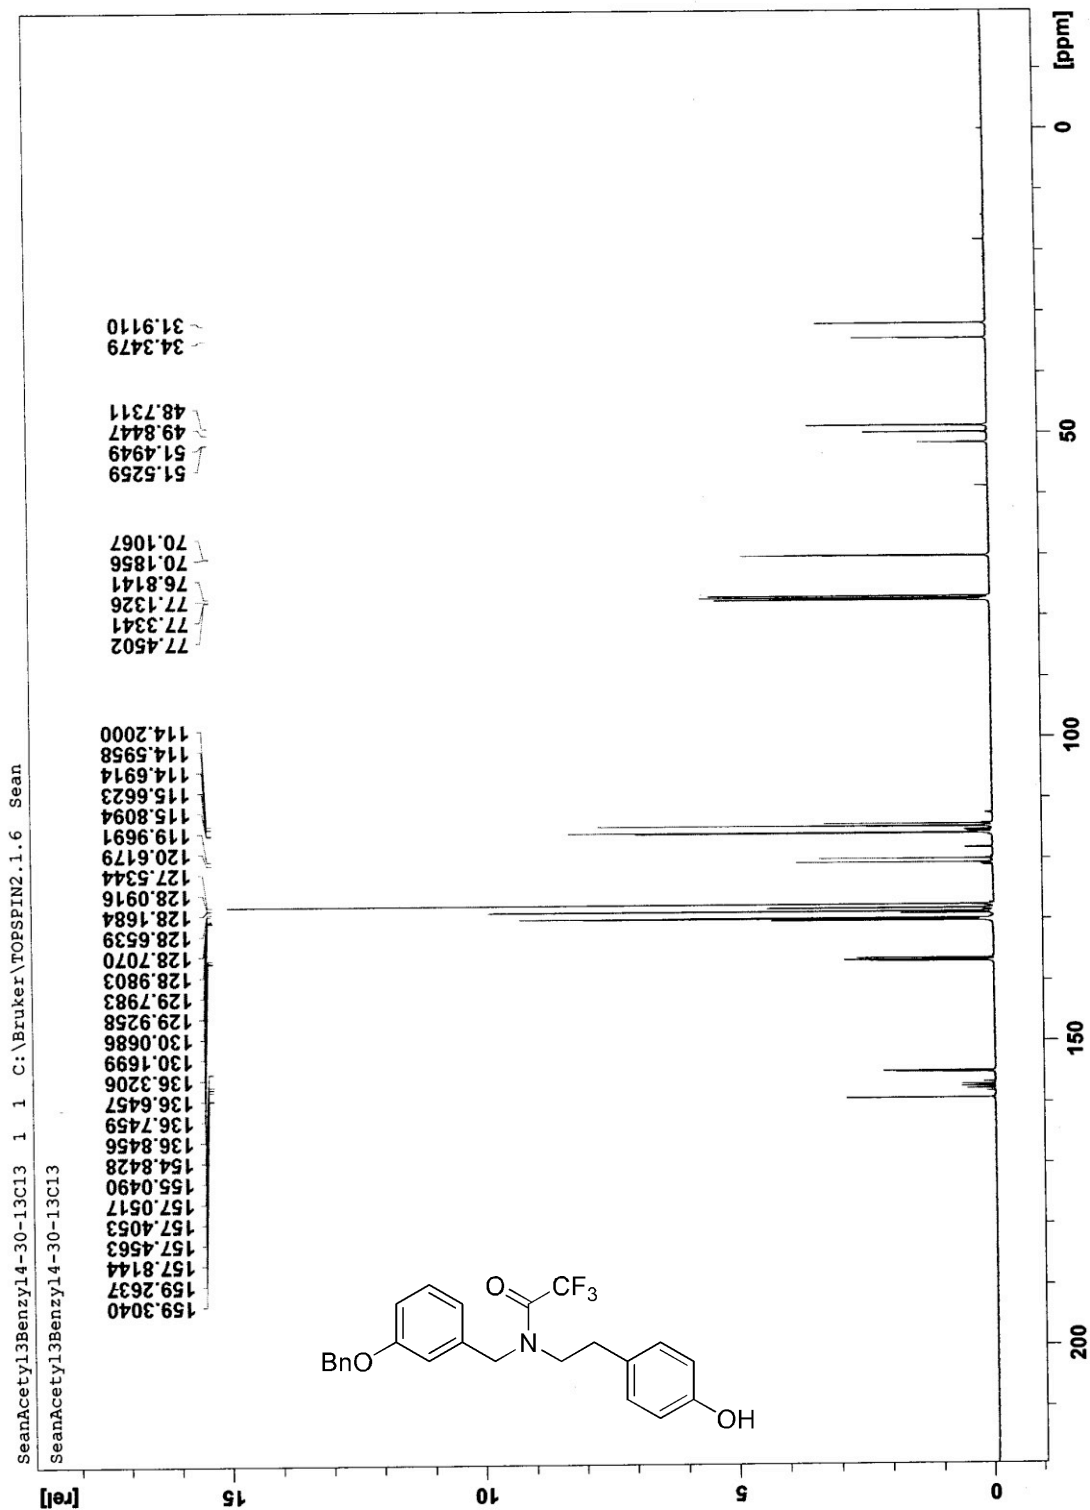

3j

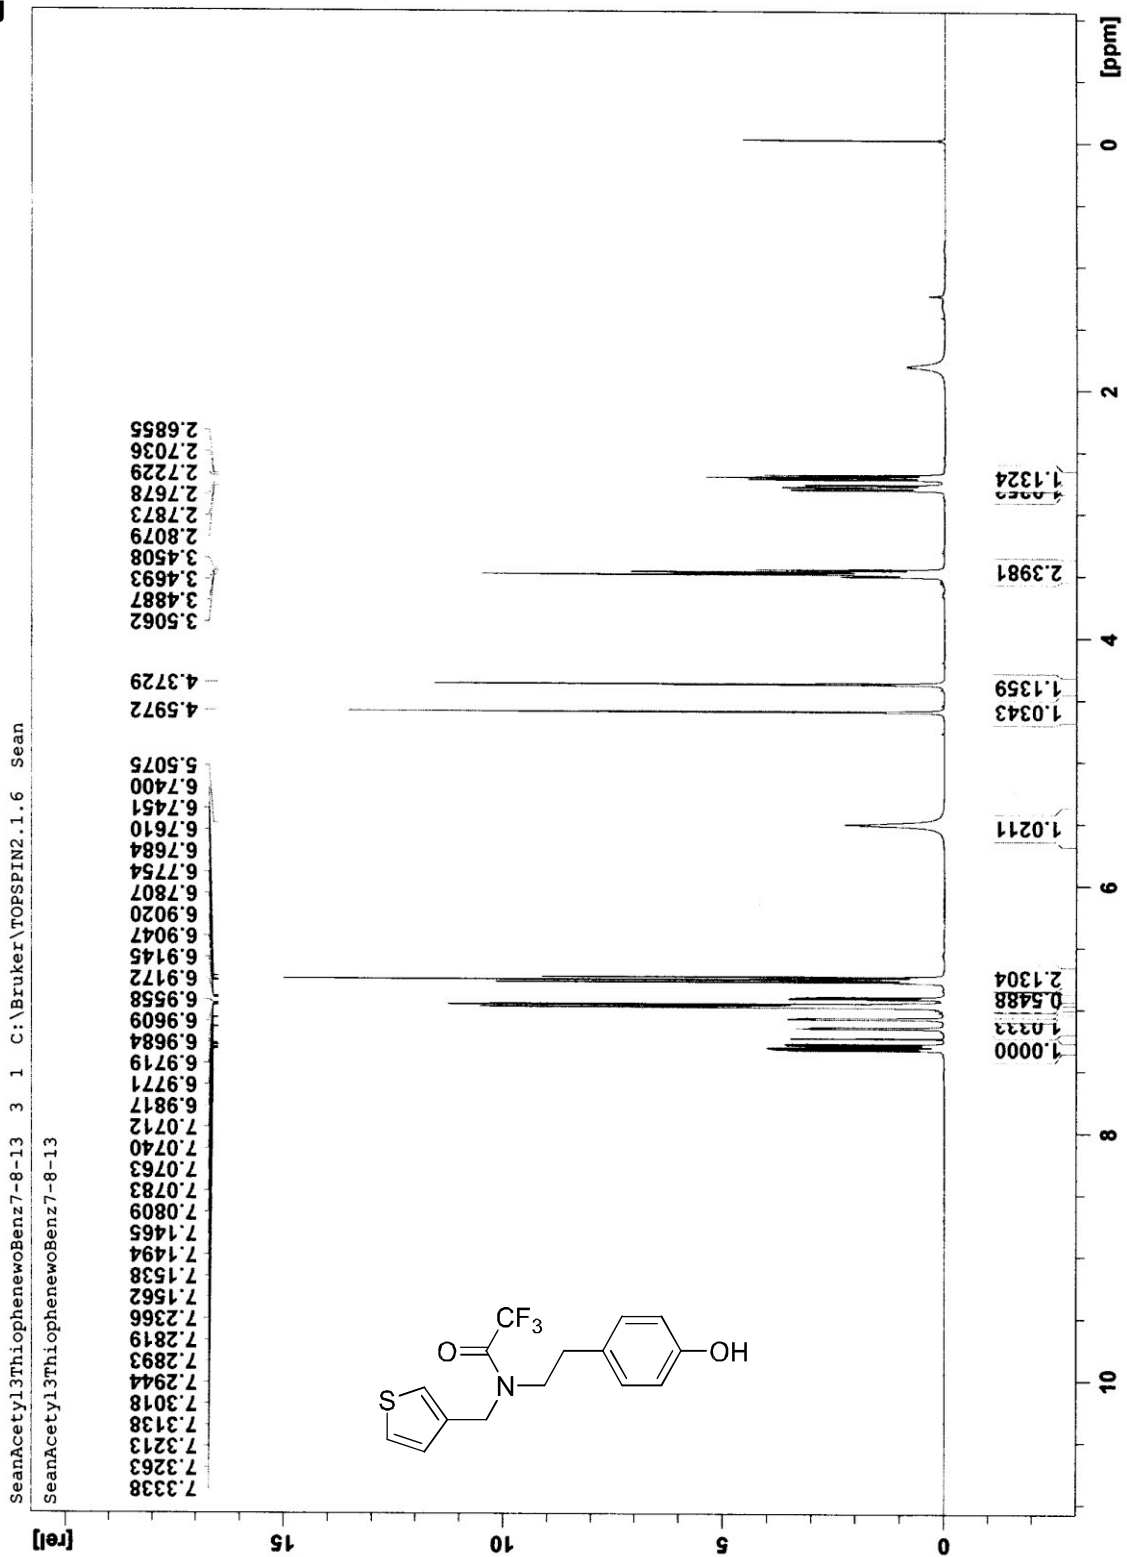

3j

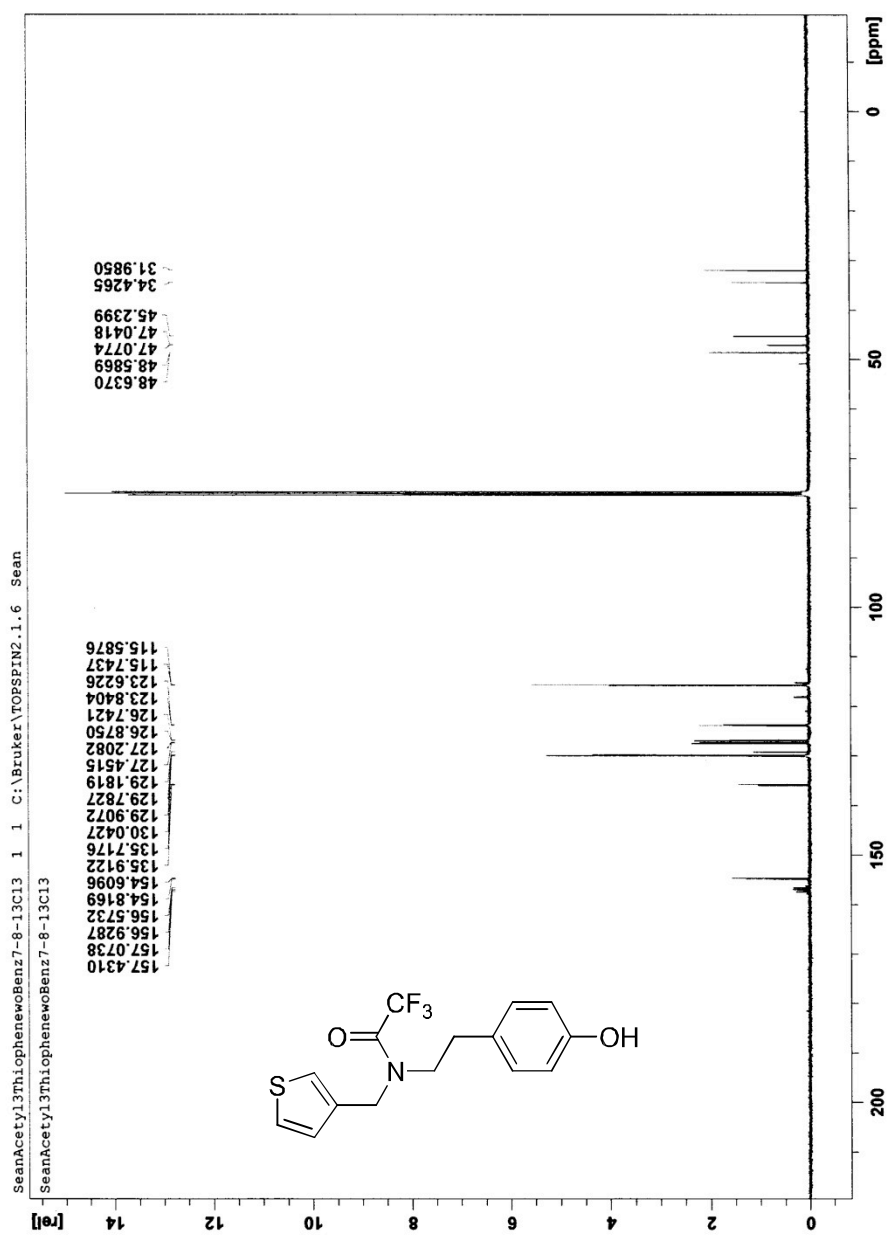

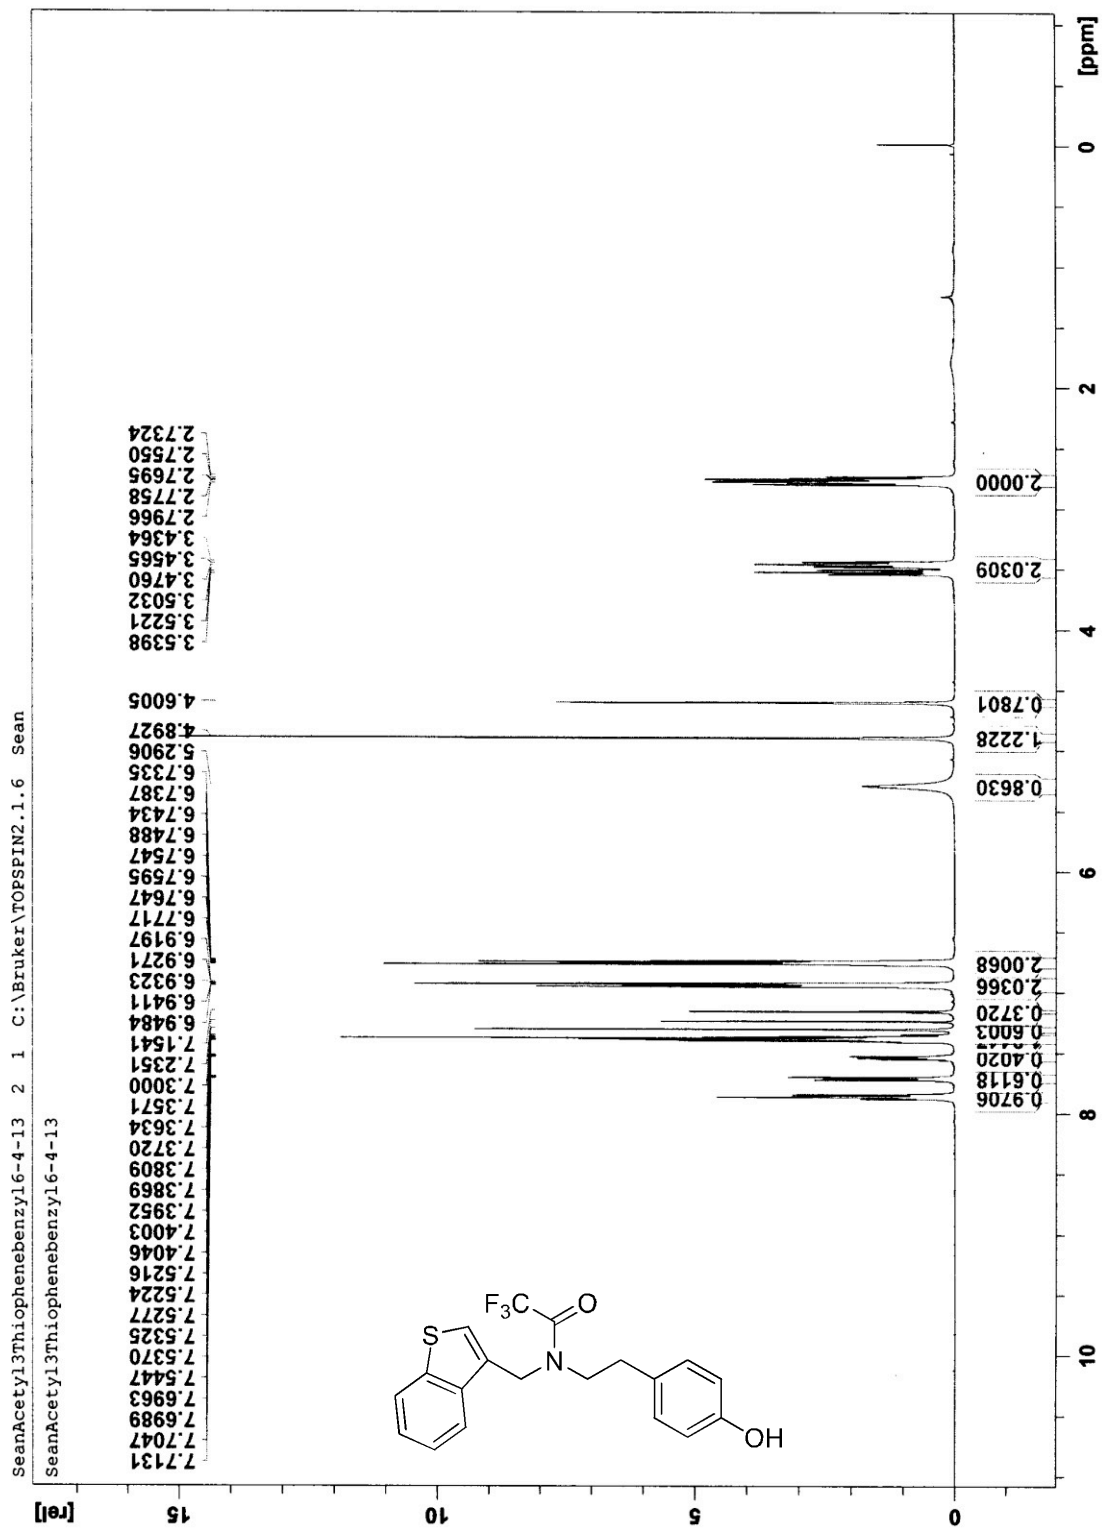

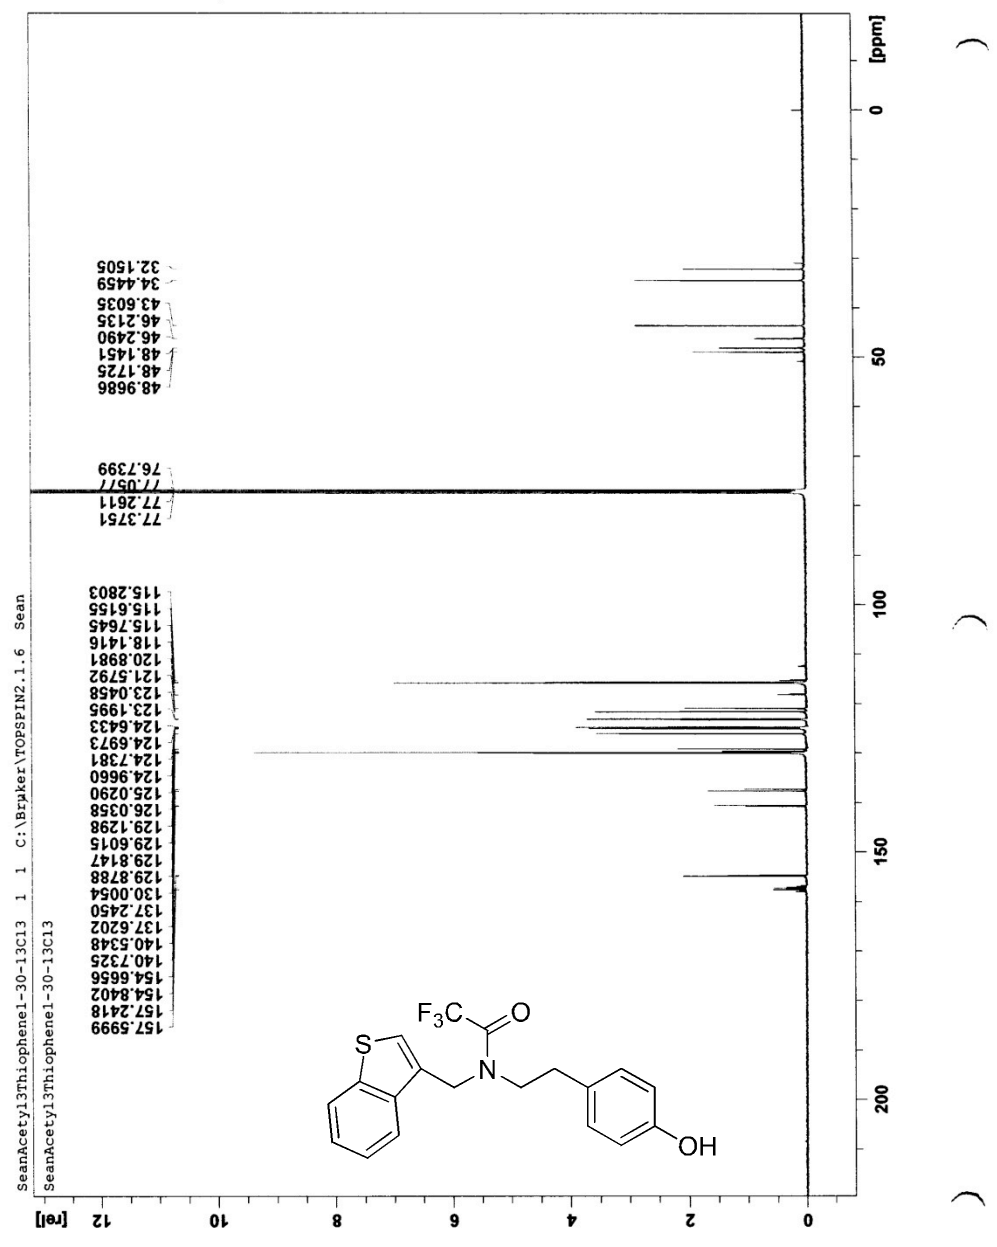

4c

SeanPifadioxane7-18-13 2 1 C:\Bruker\TOPSPIN2.1.6 Sean  
SeanPifadioxane7-18-13

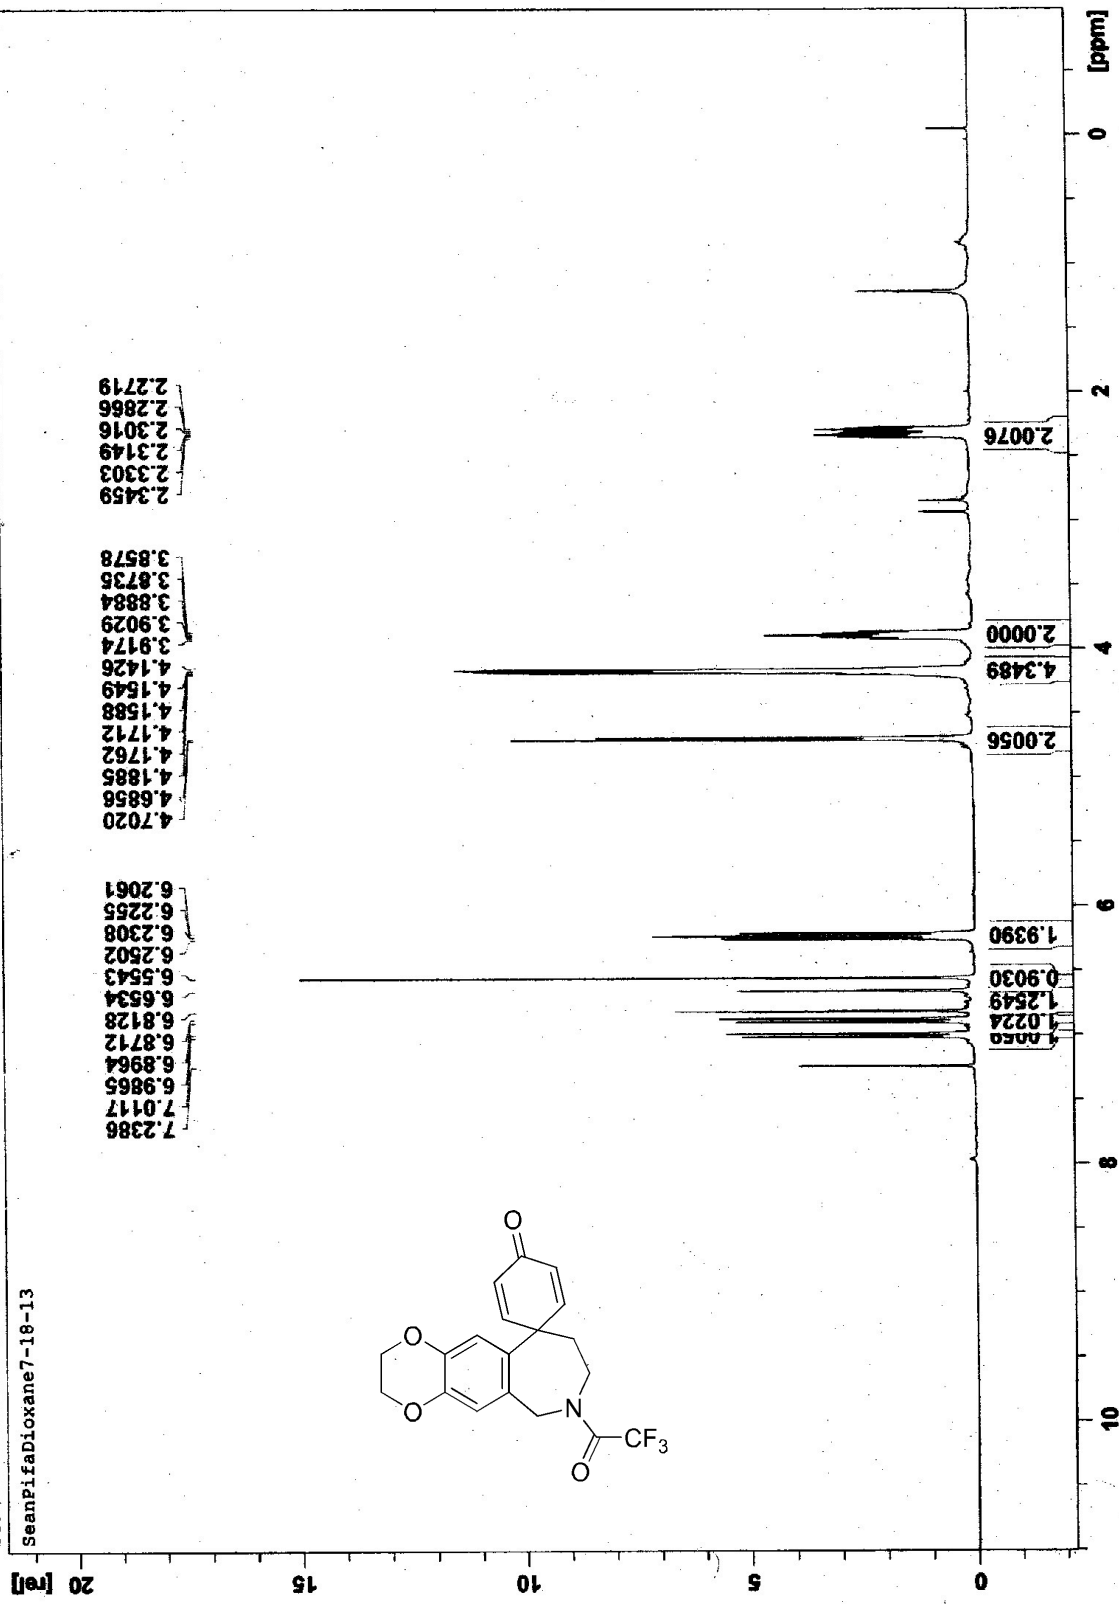



4c

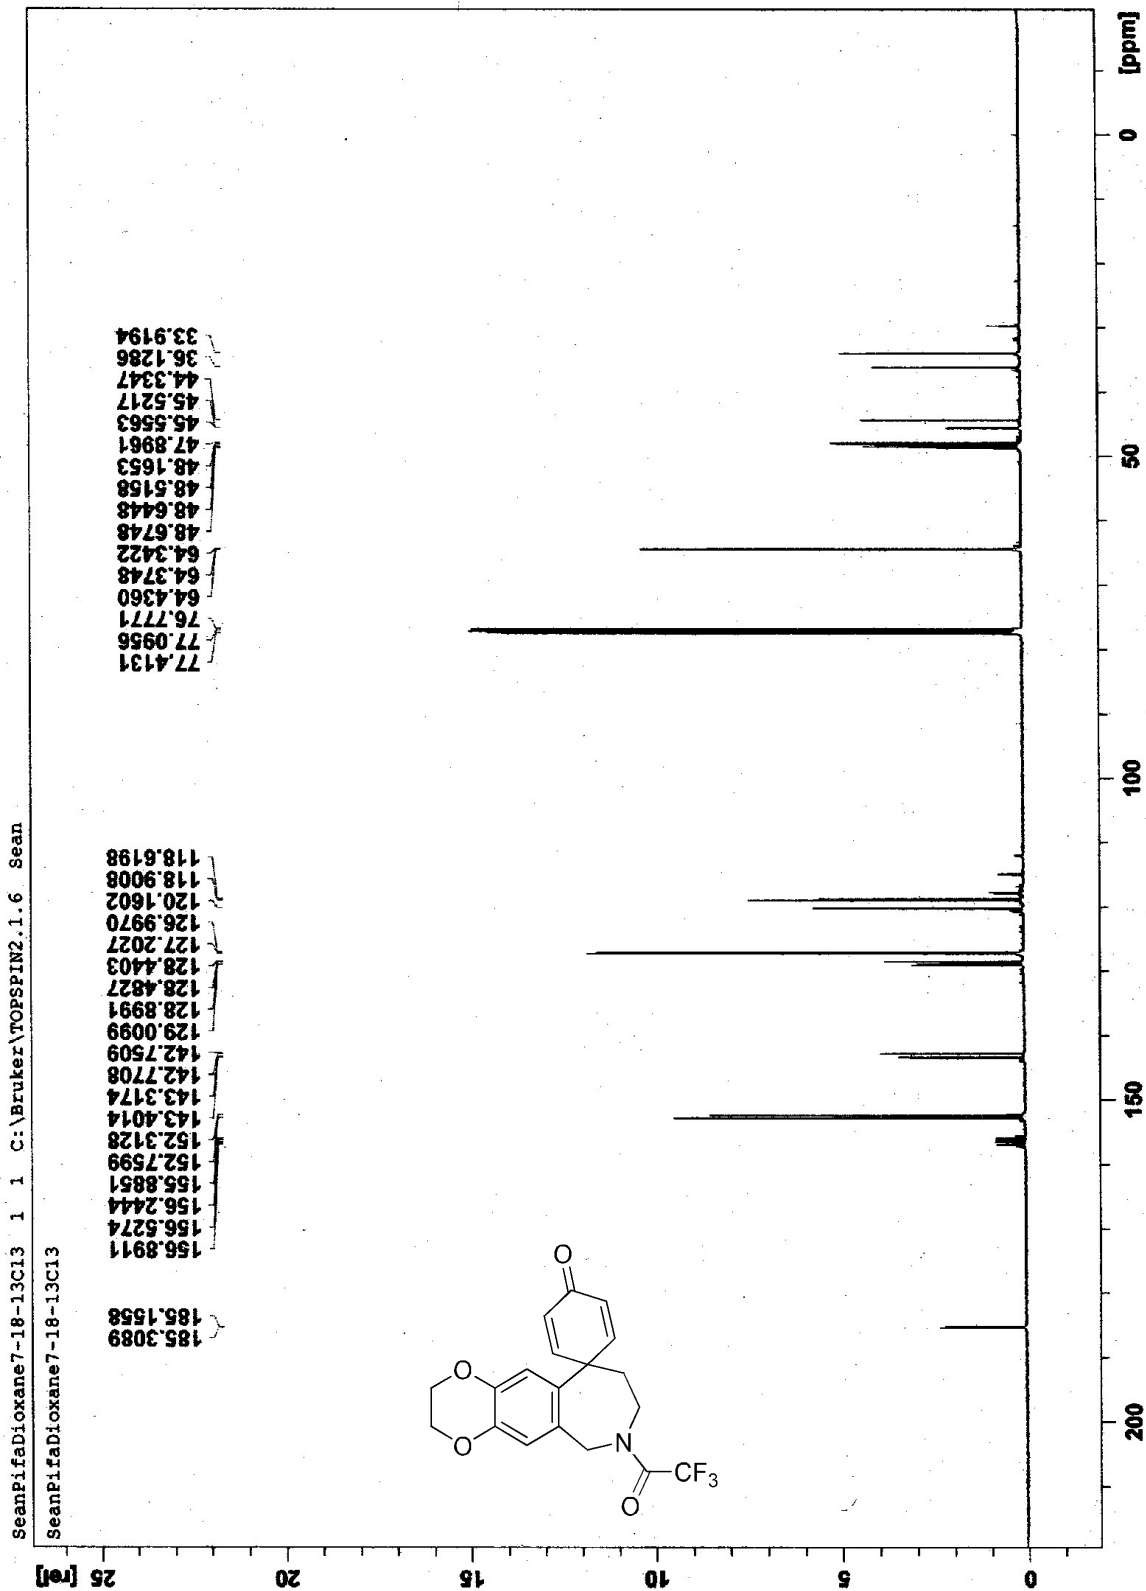

4d

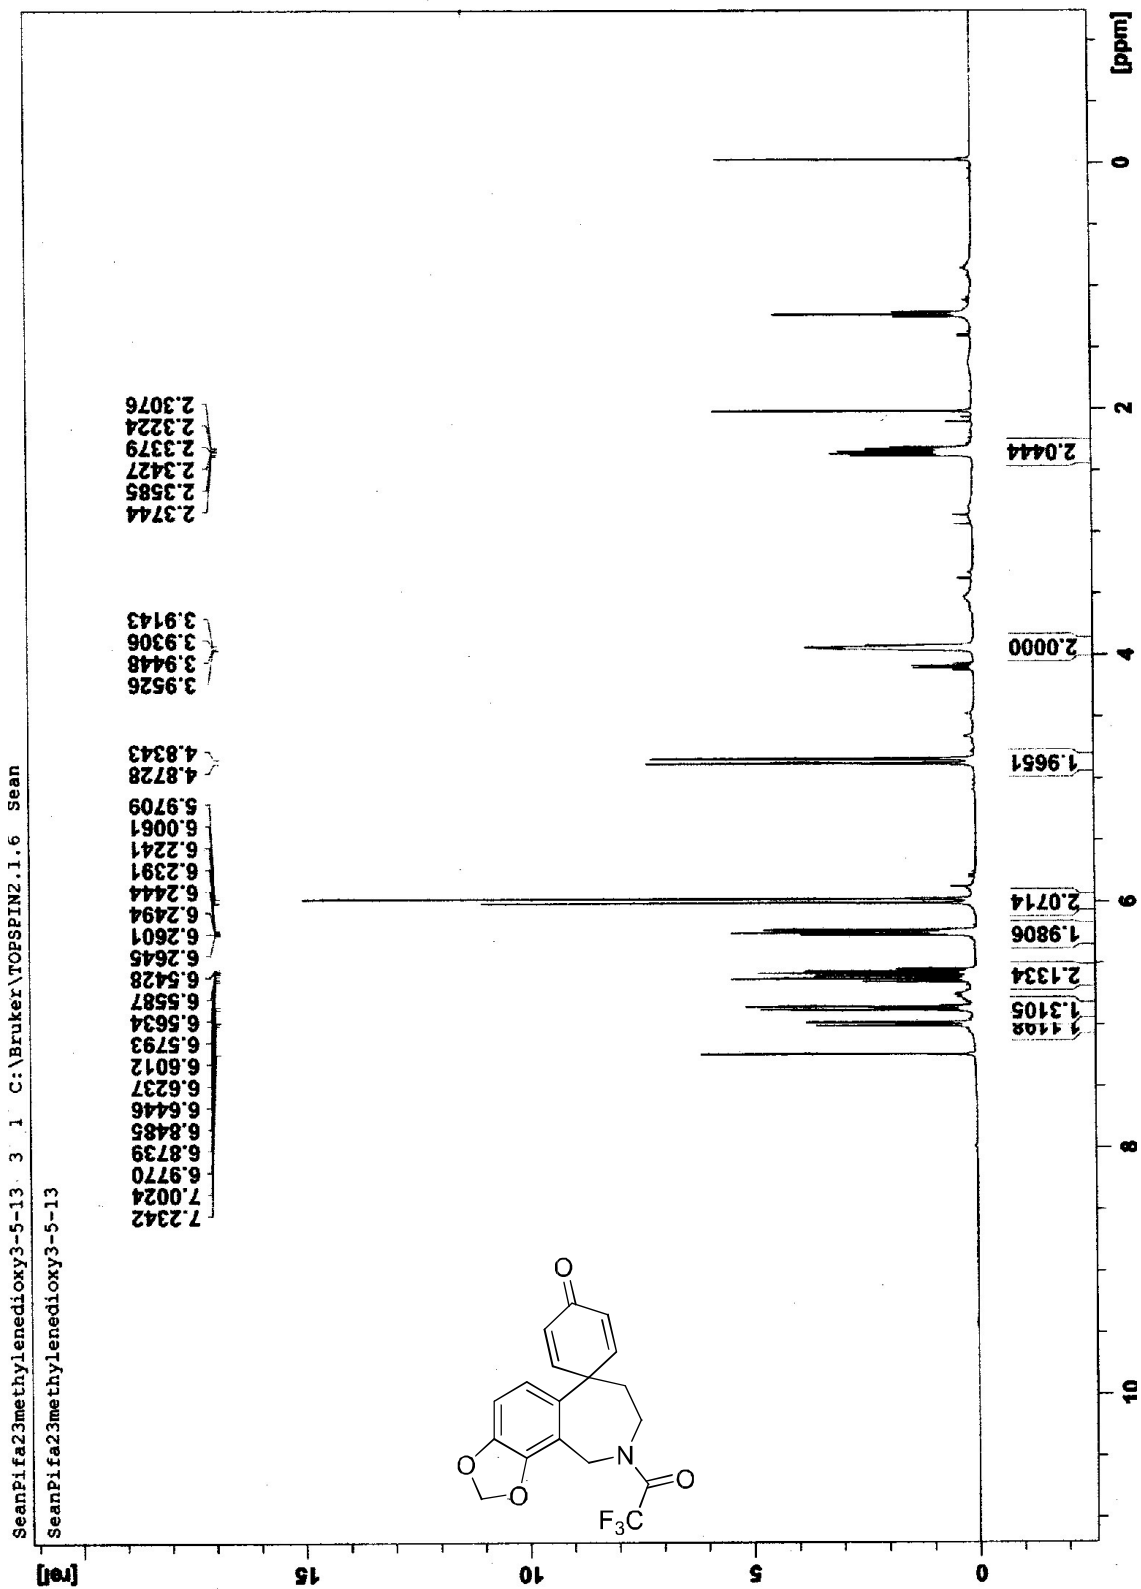

4d

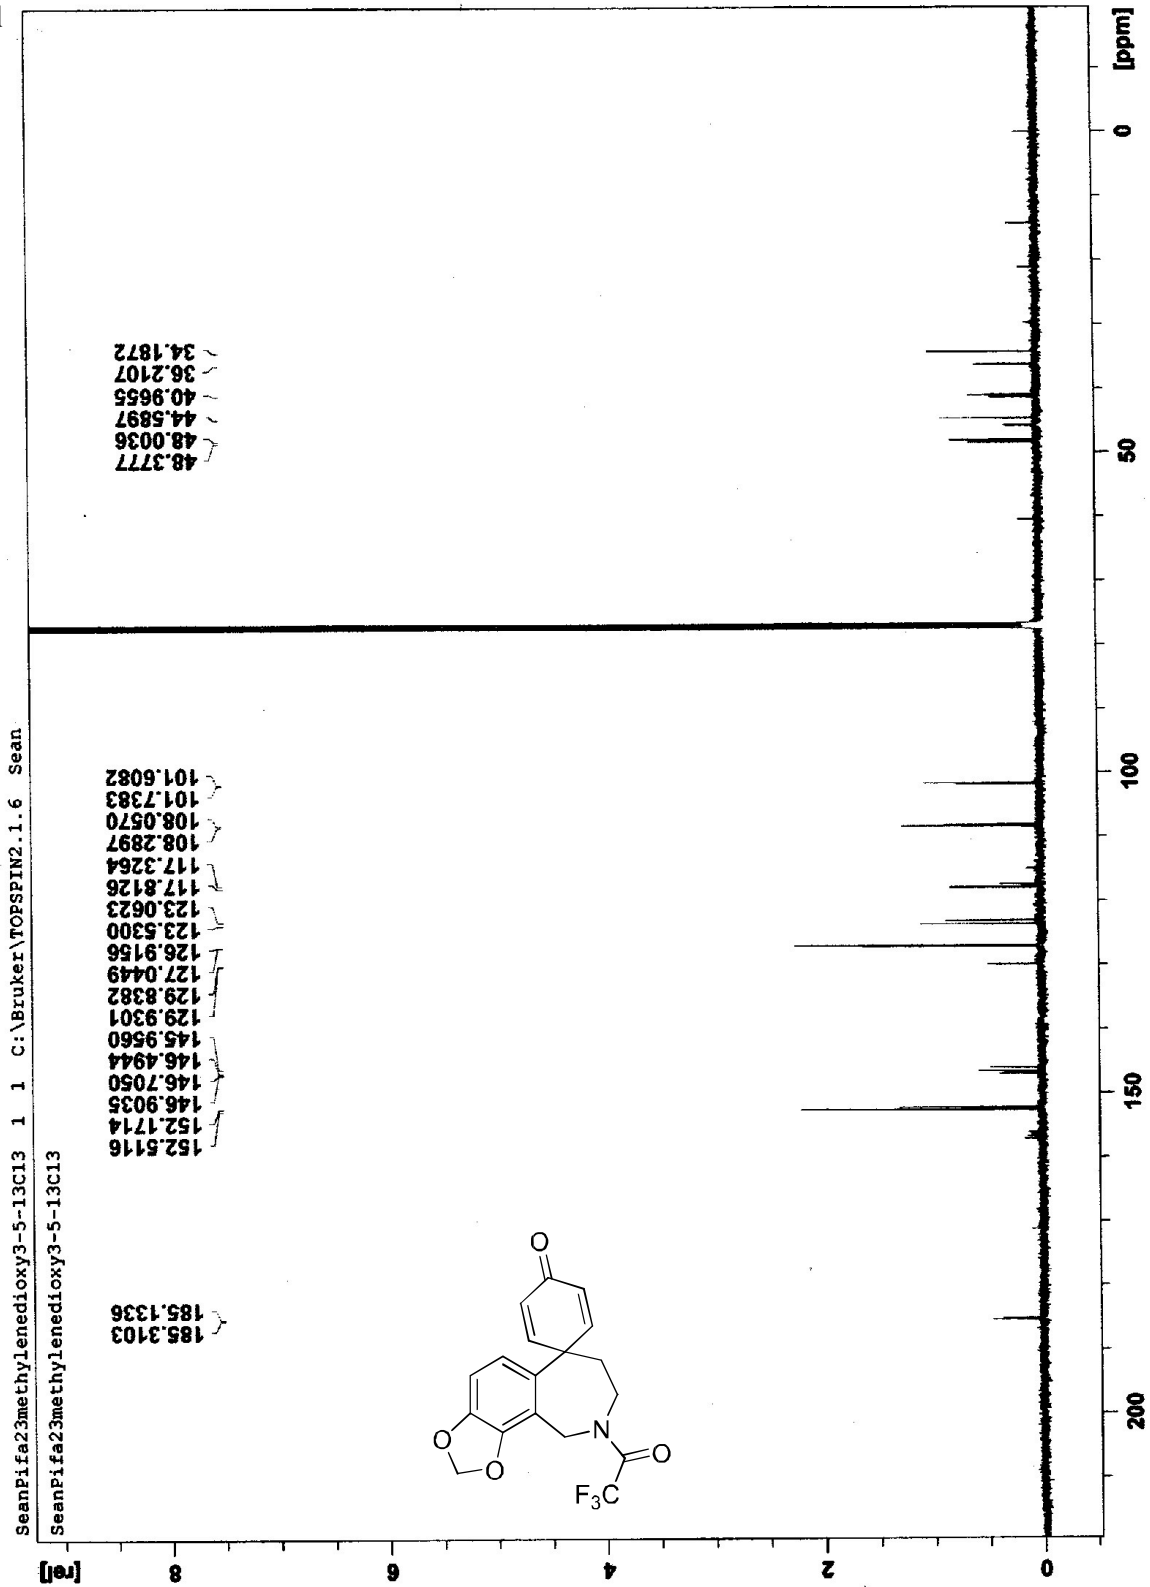

4f

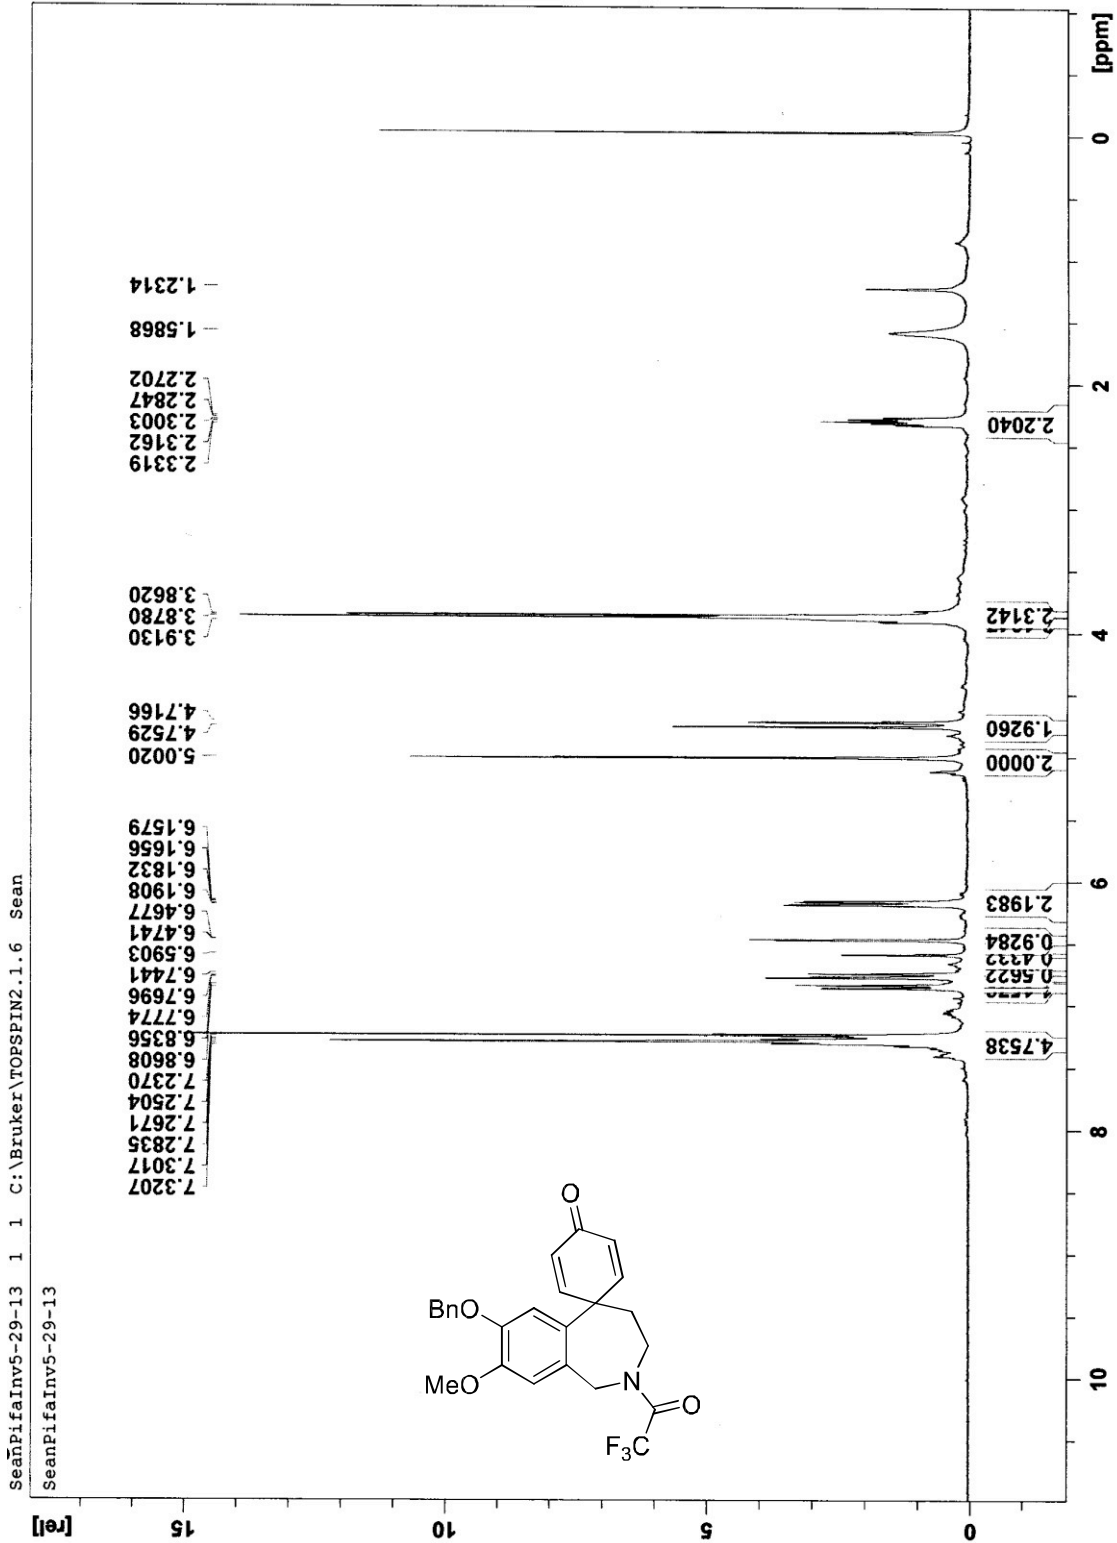

SeanPifalnv5-29-13 1 1 C:\Bruker\TOPSPIN2.1.6 Sean  
SeanPifalnv5-29-13

4f

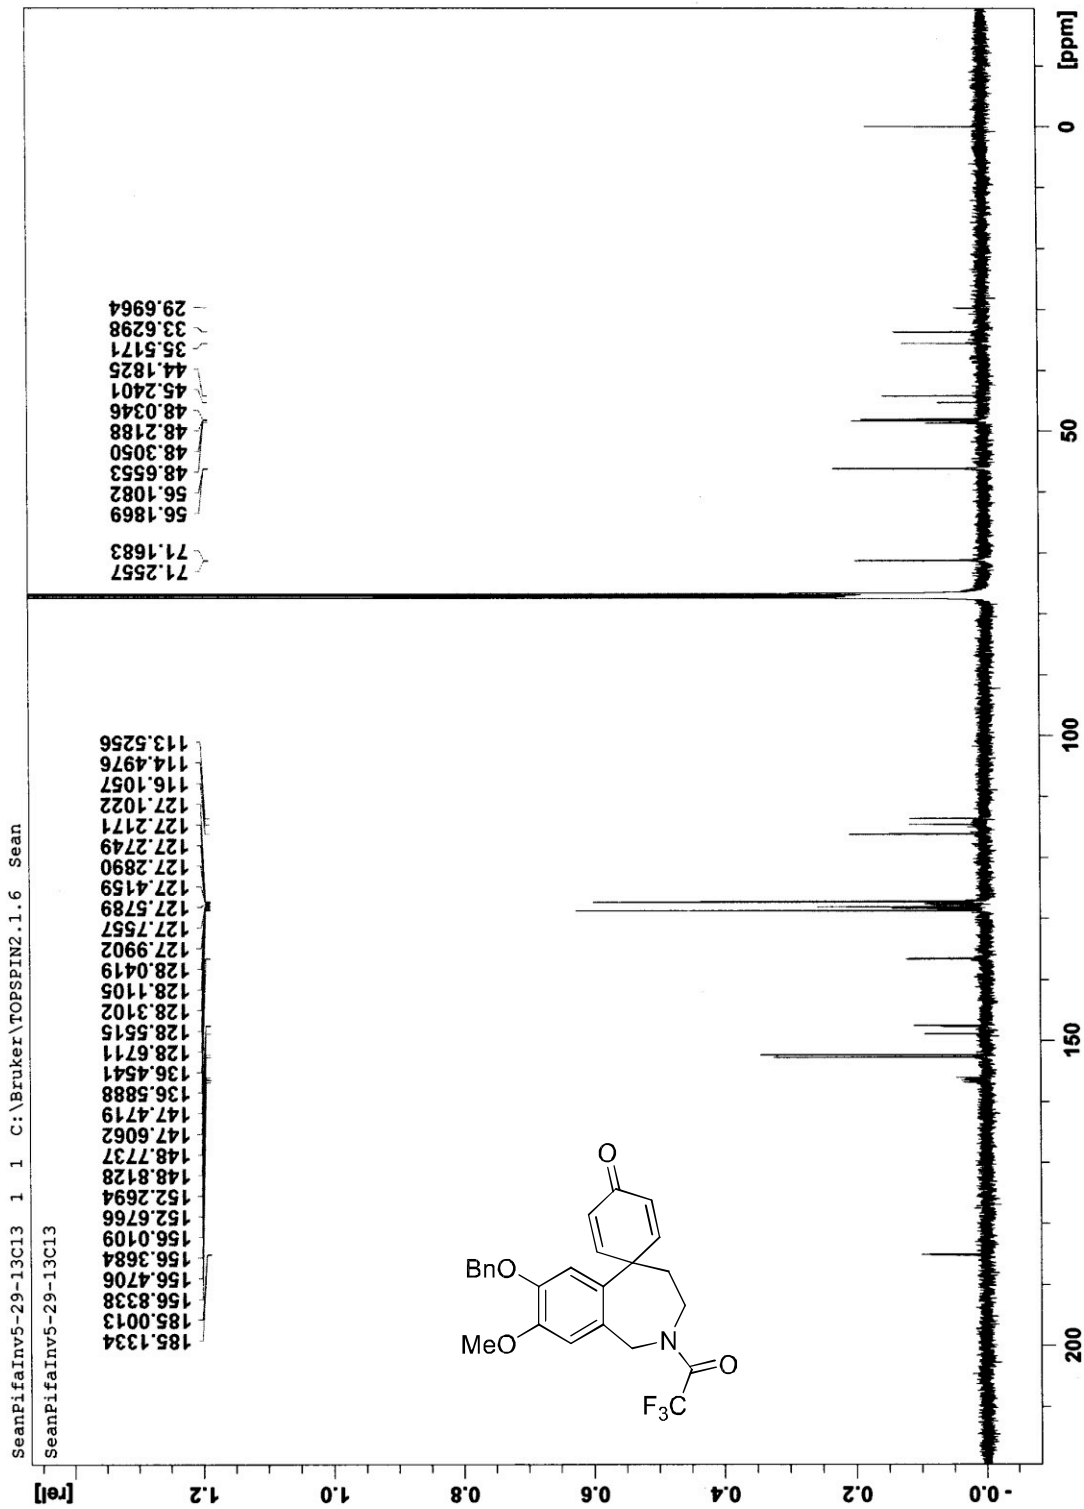

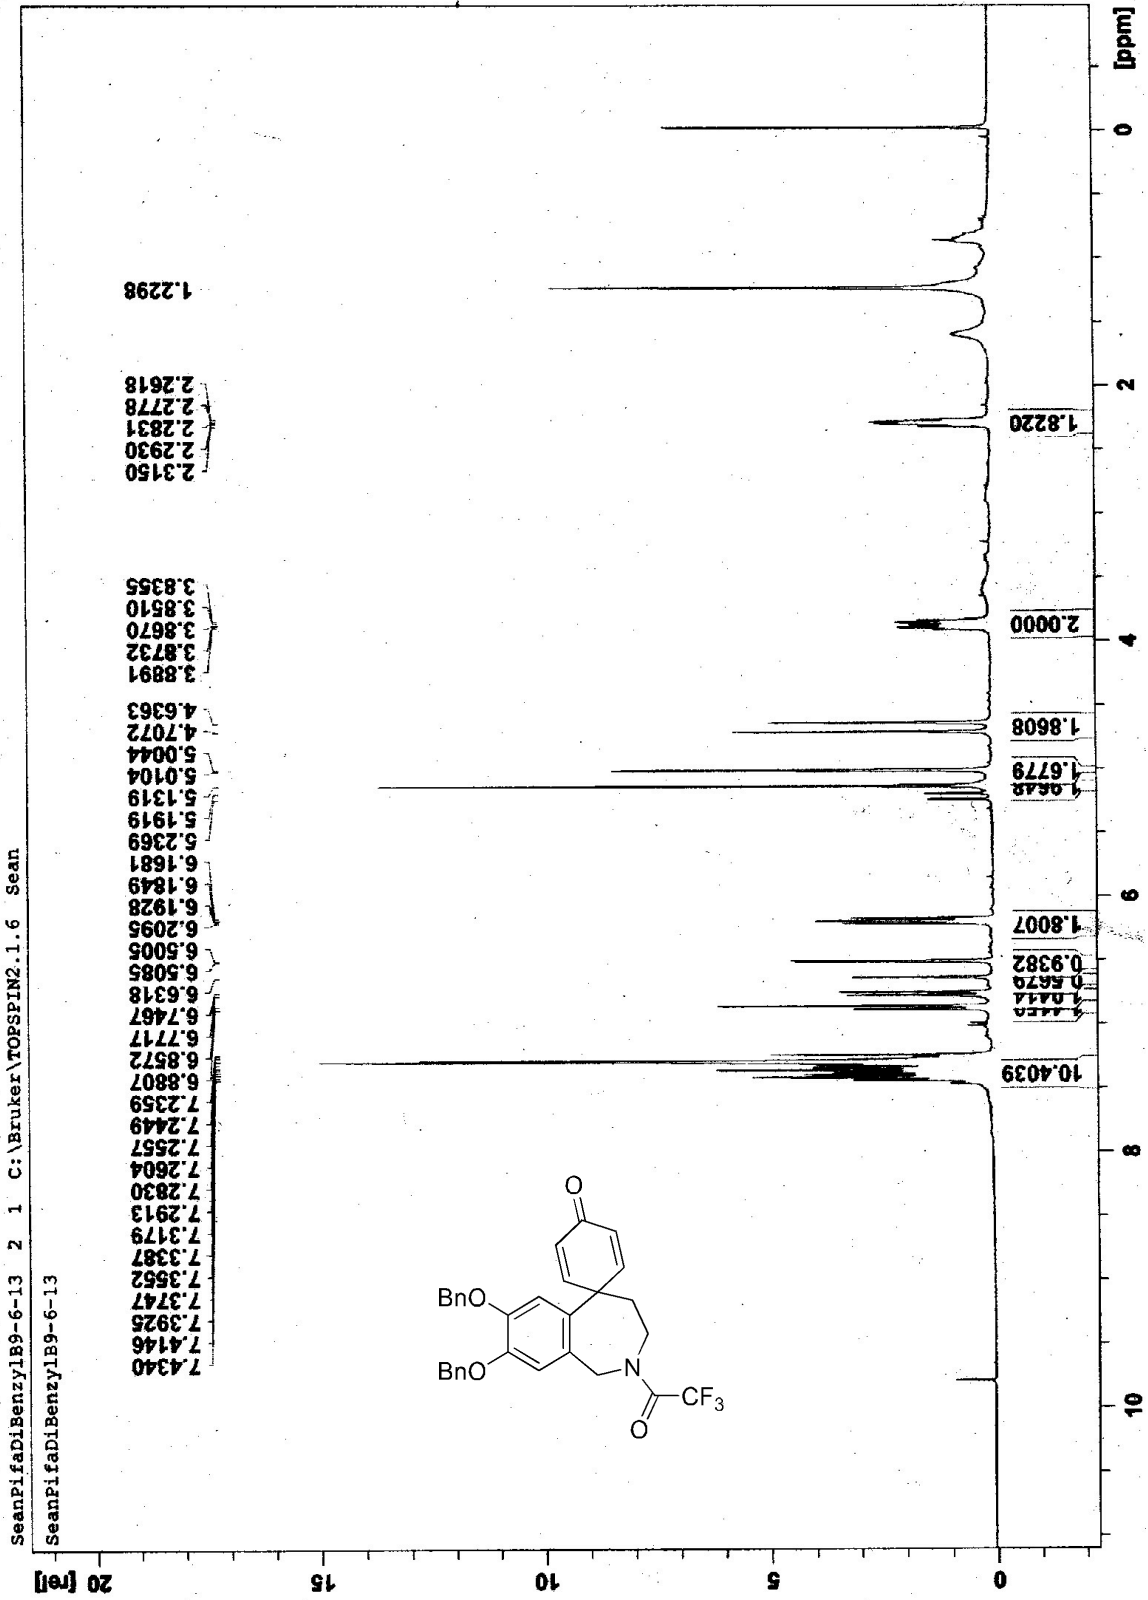

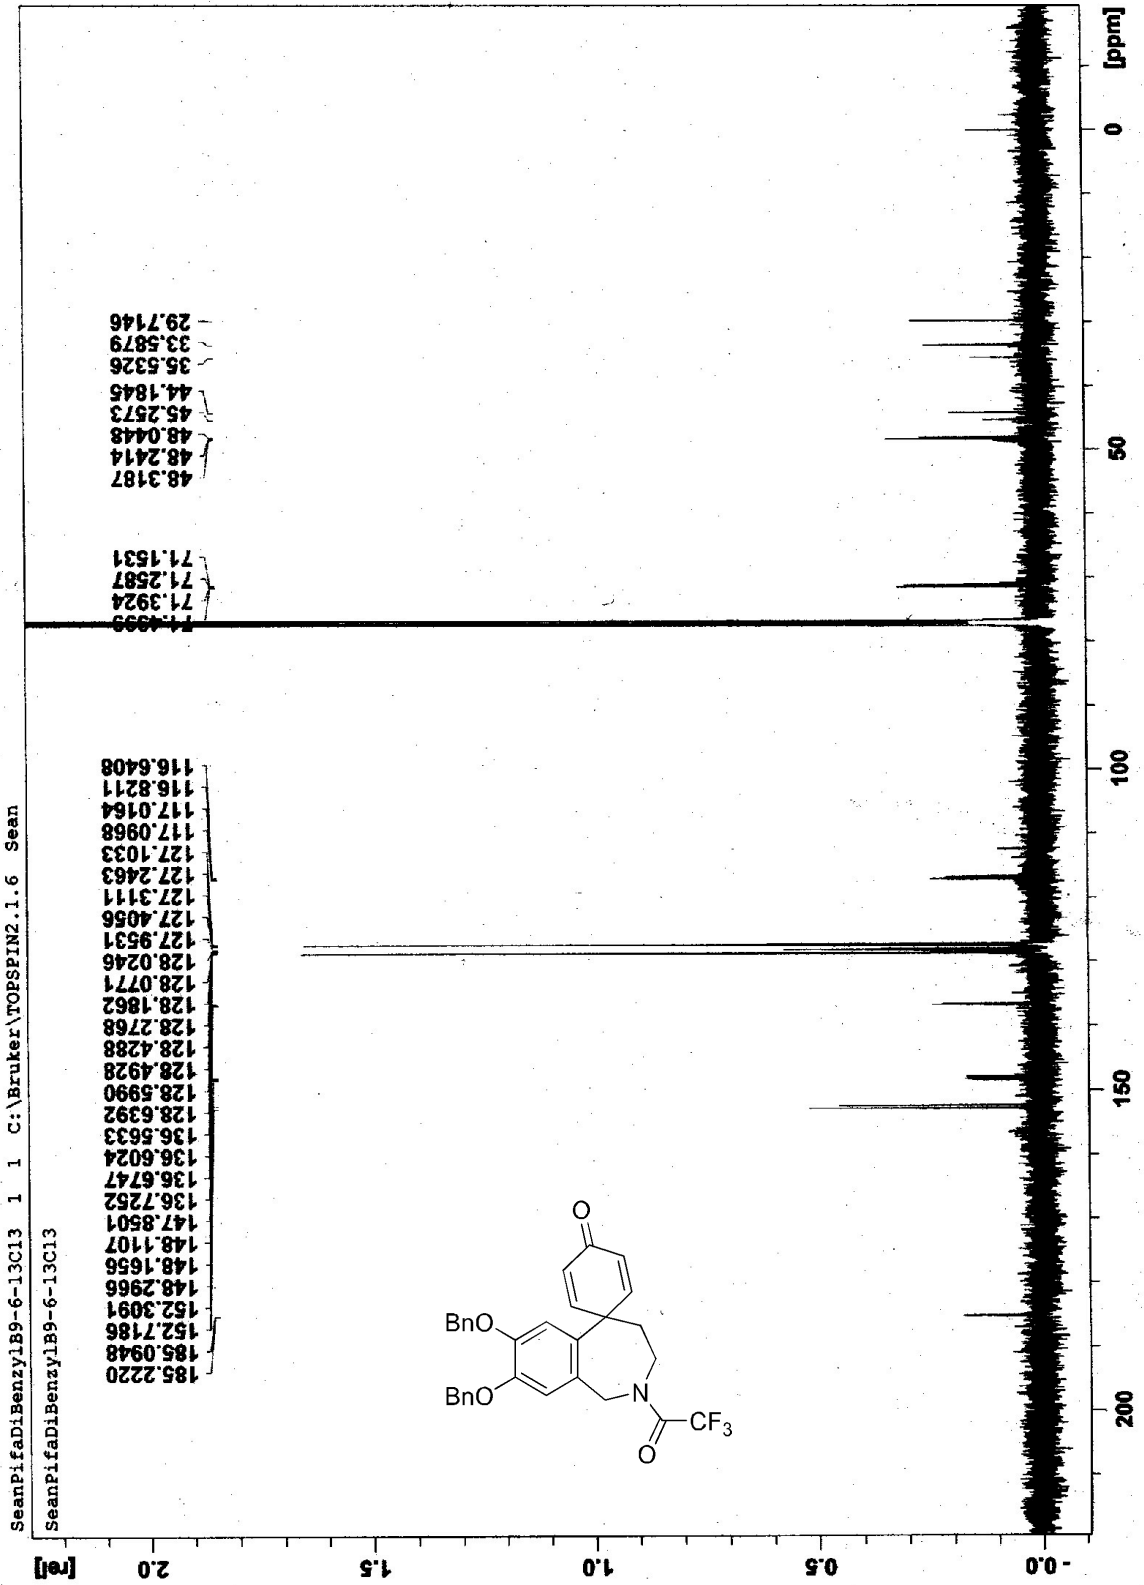

4h

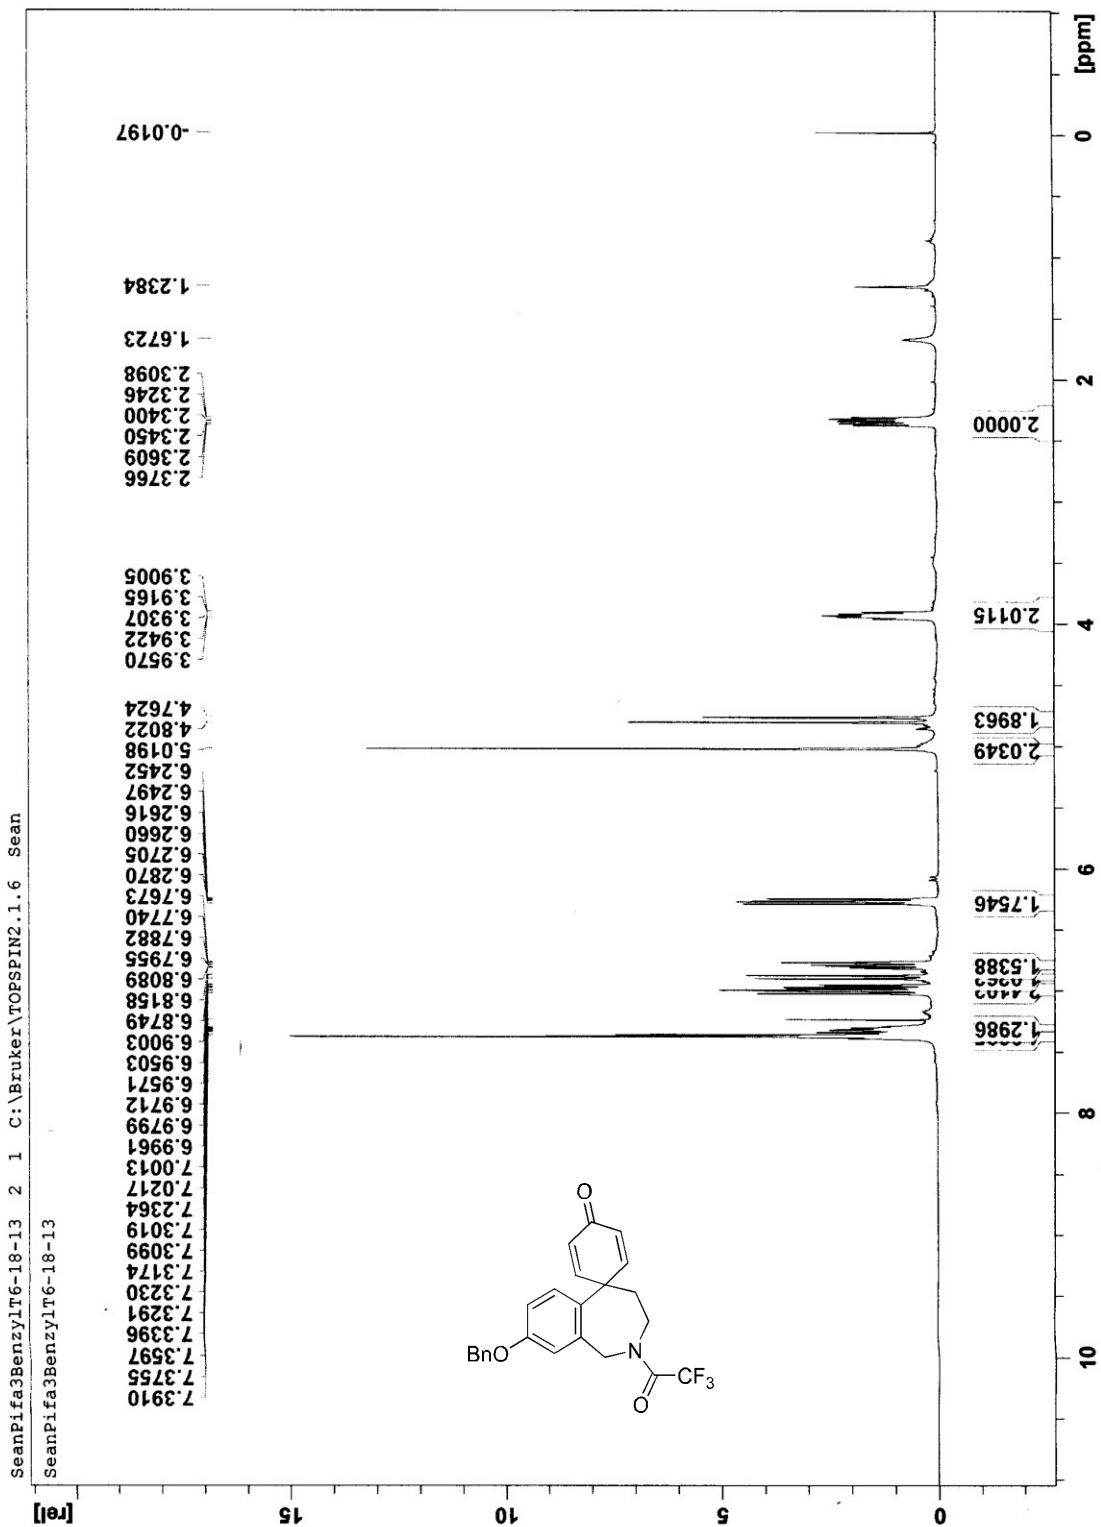



4h

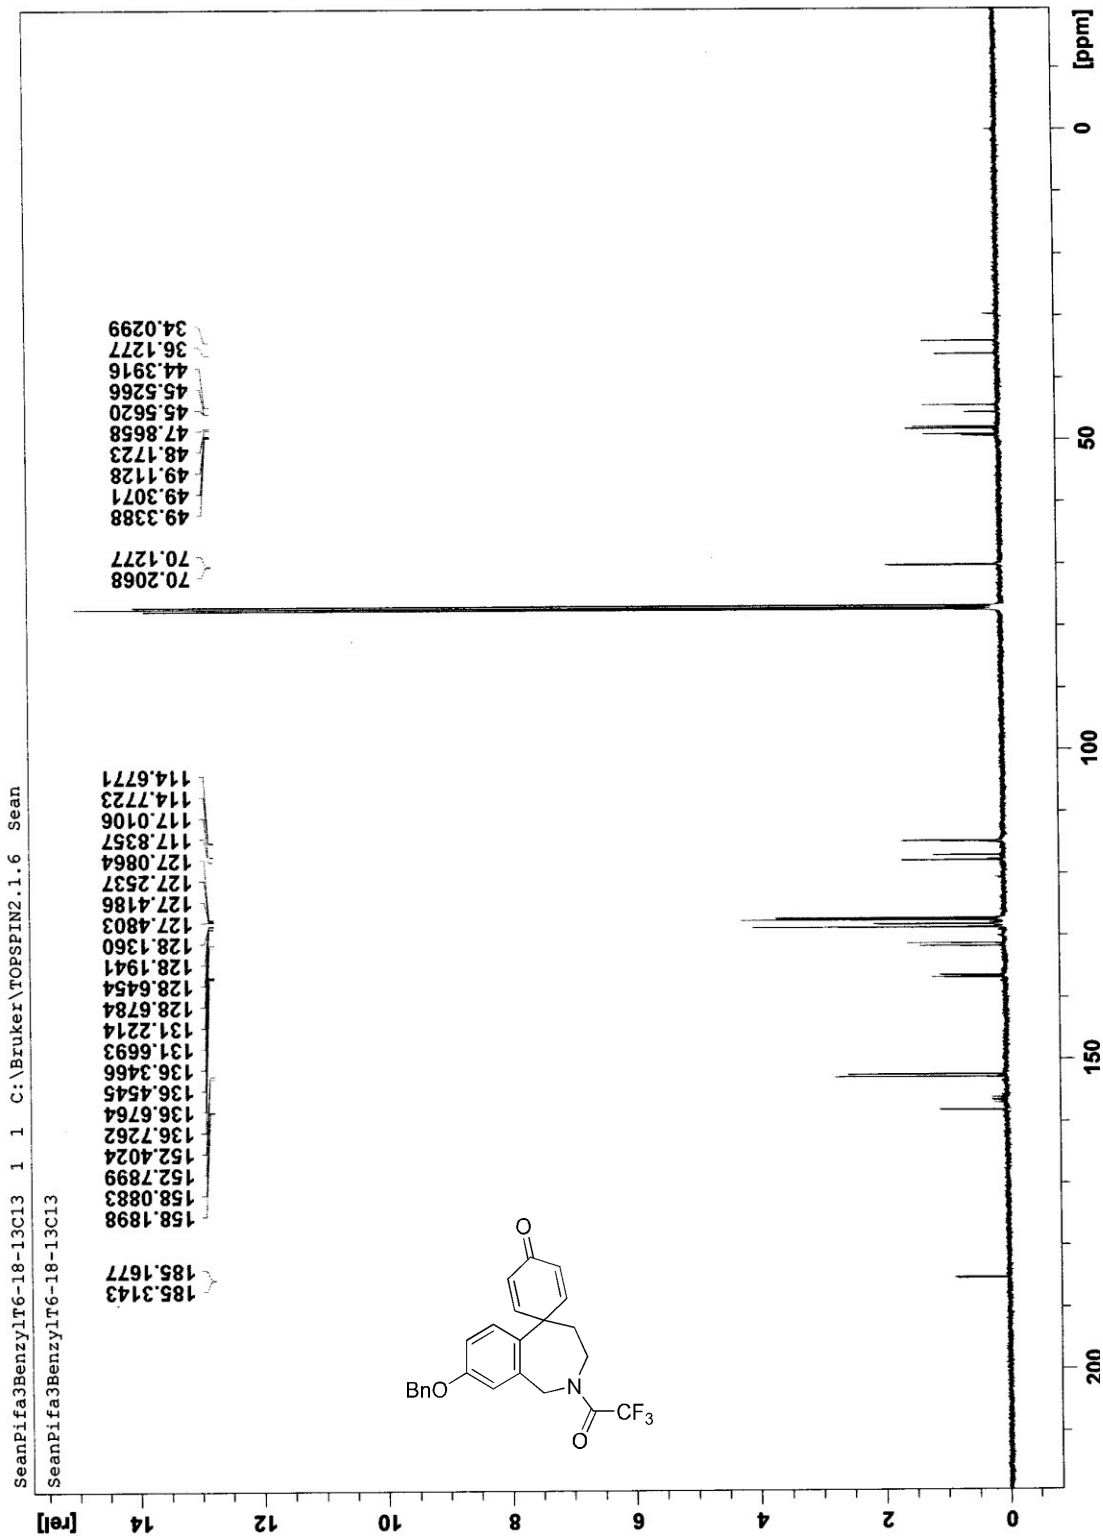



4i

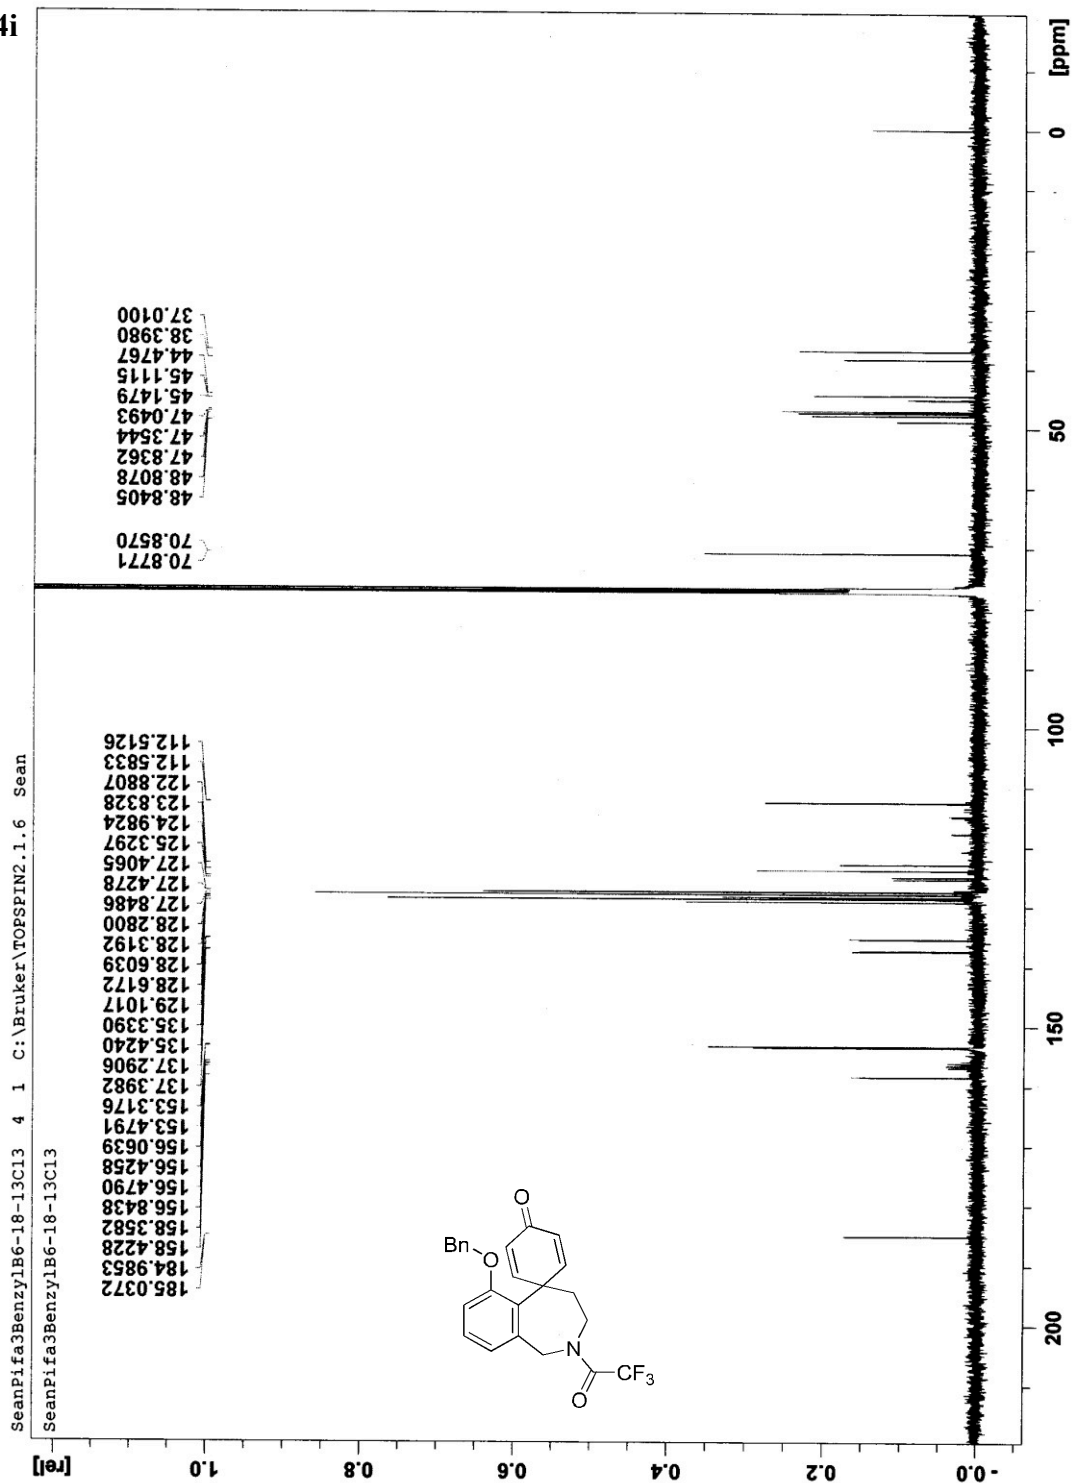

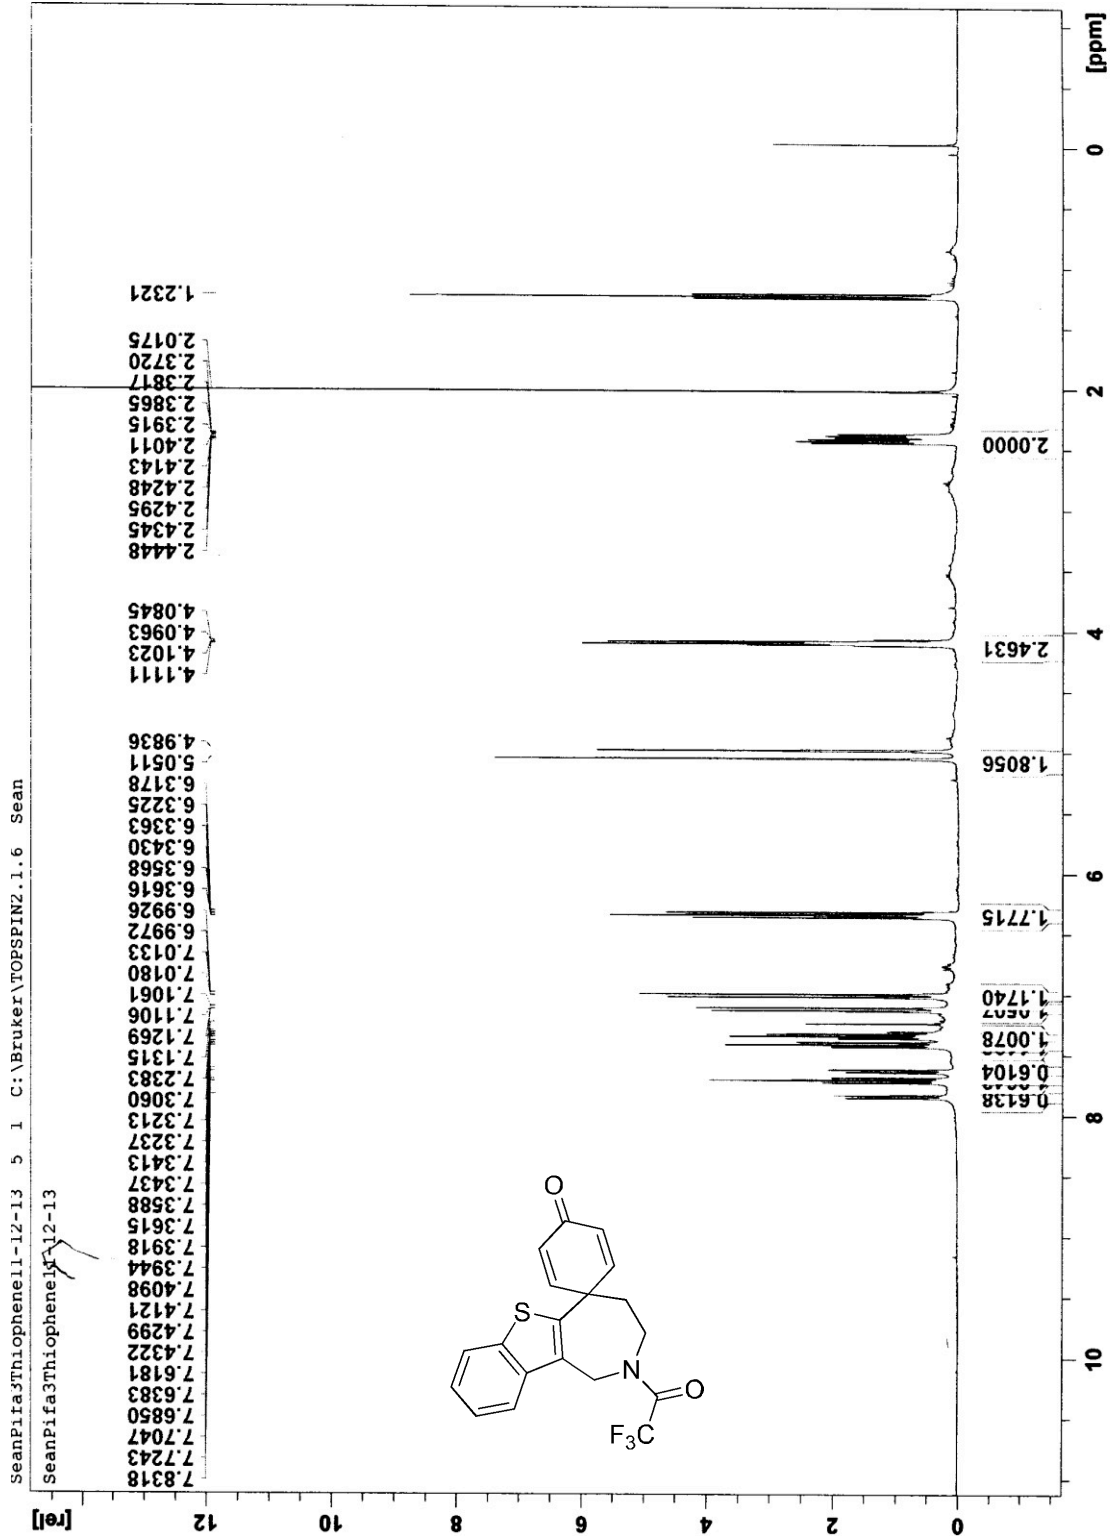

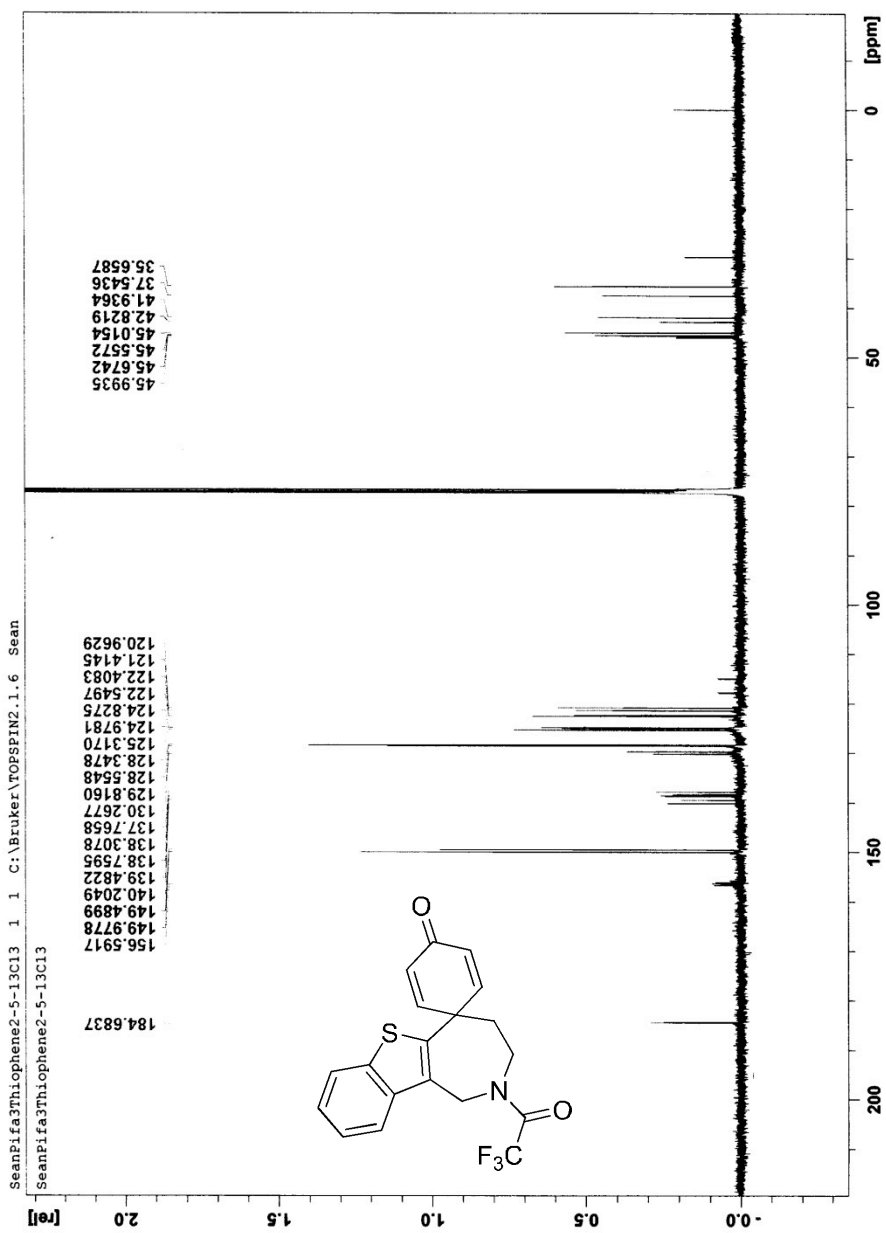

5c

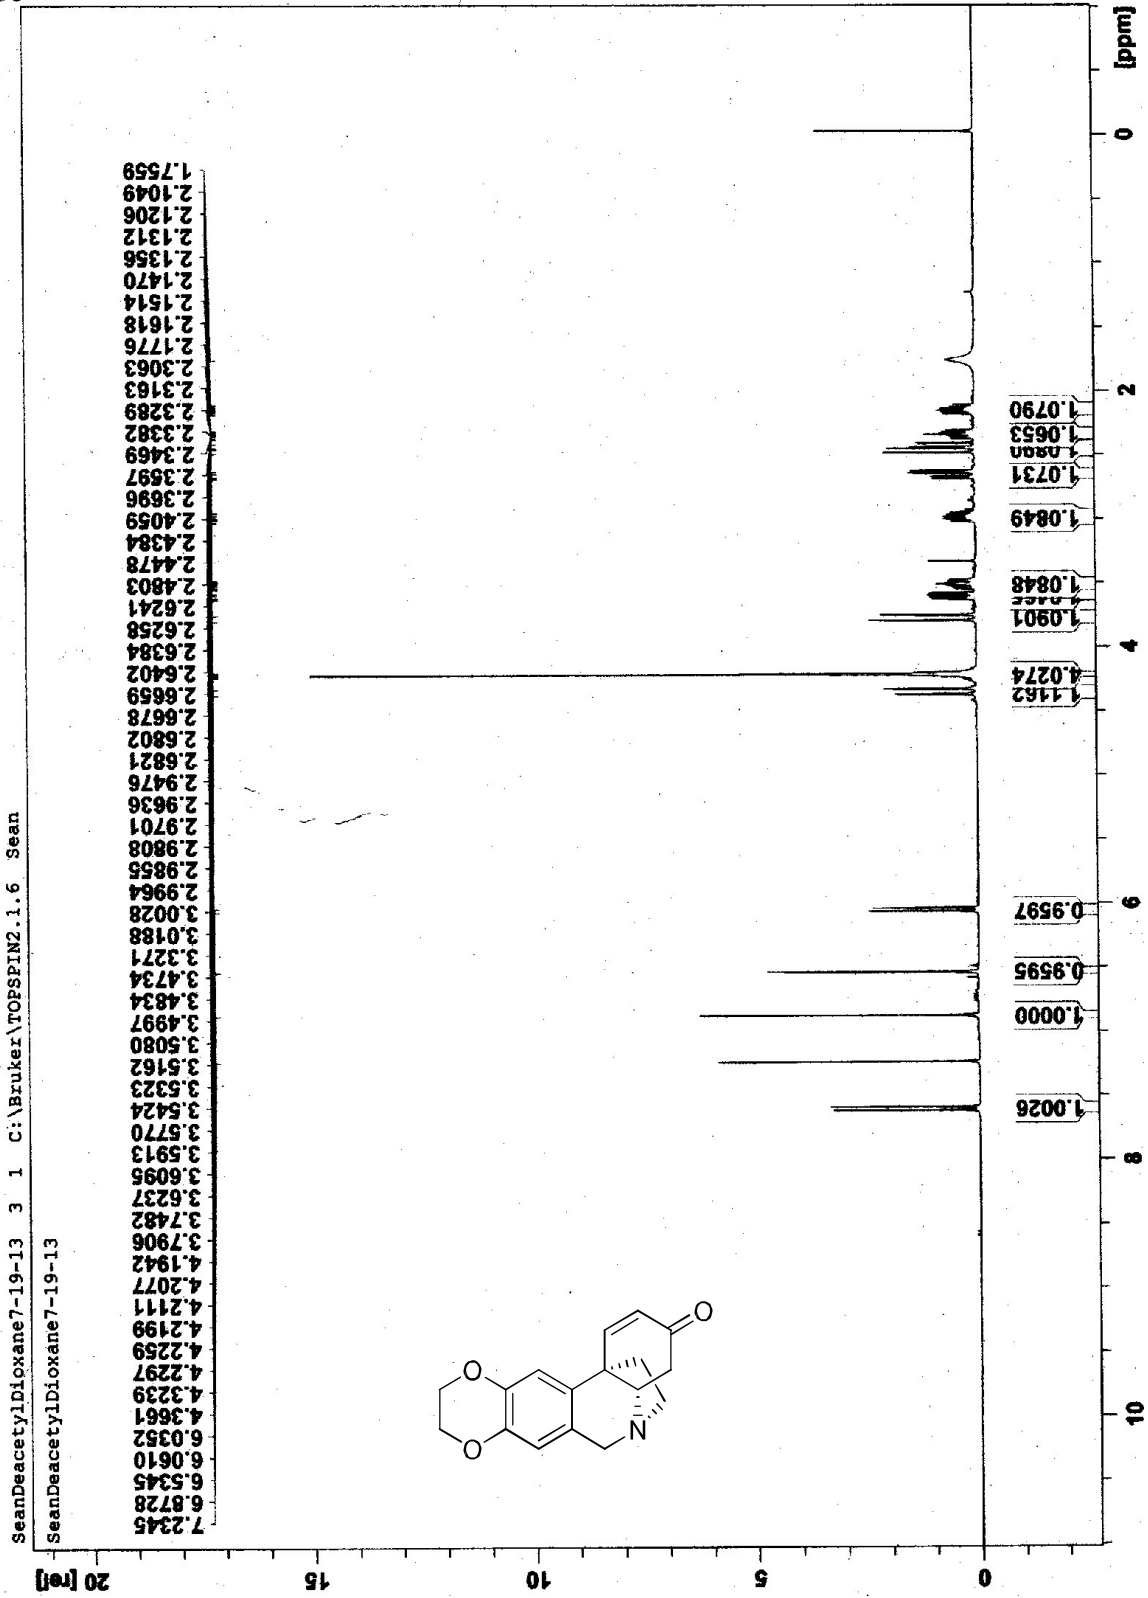

5c

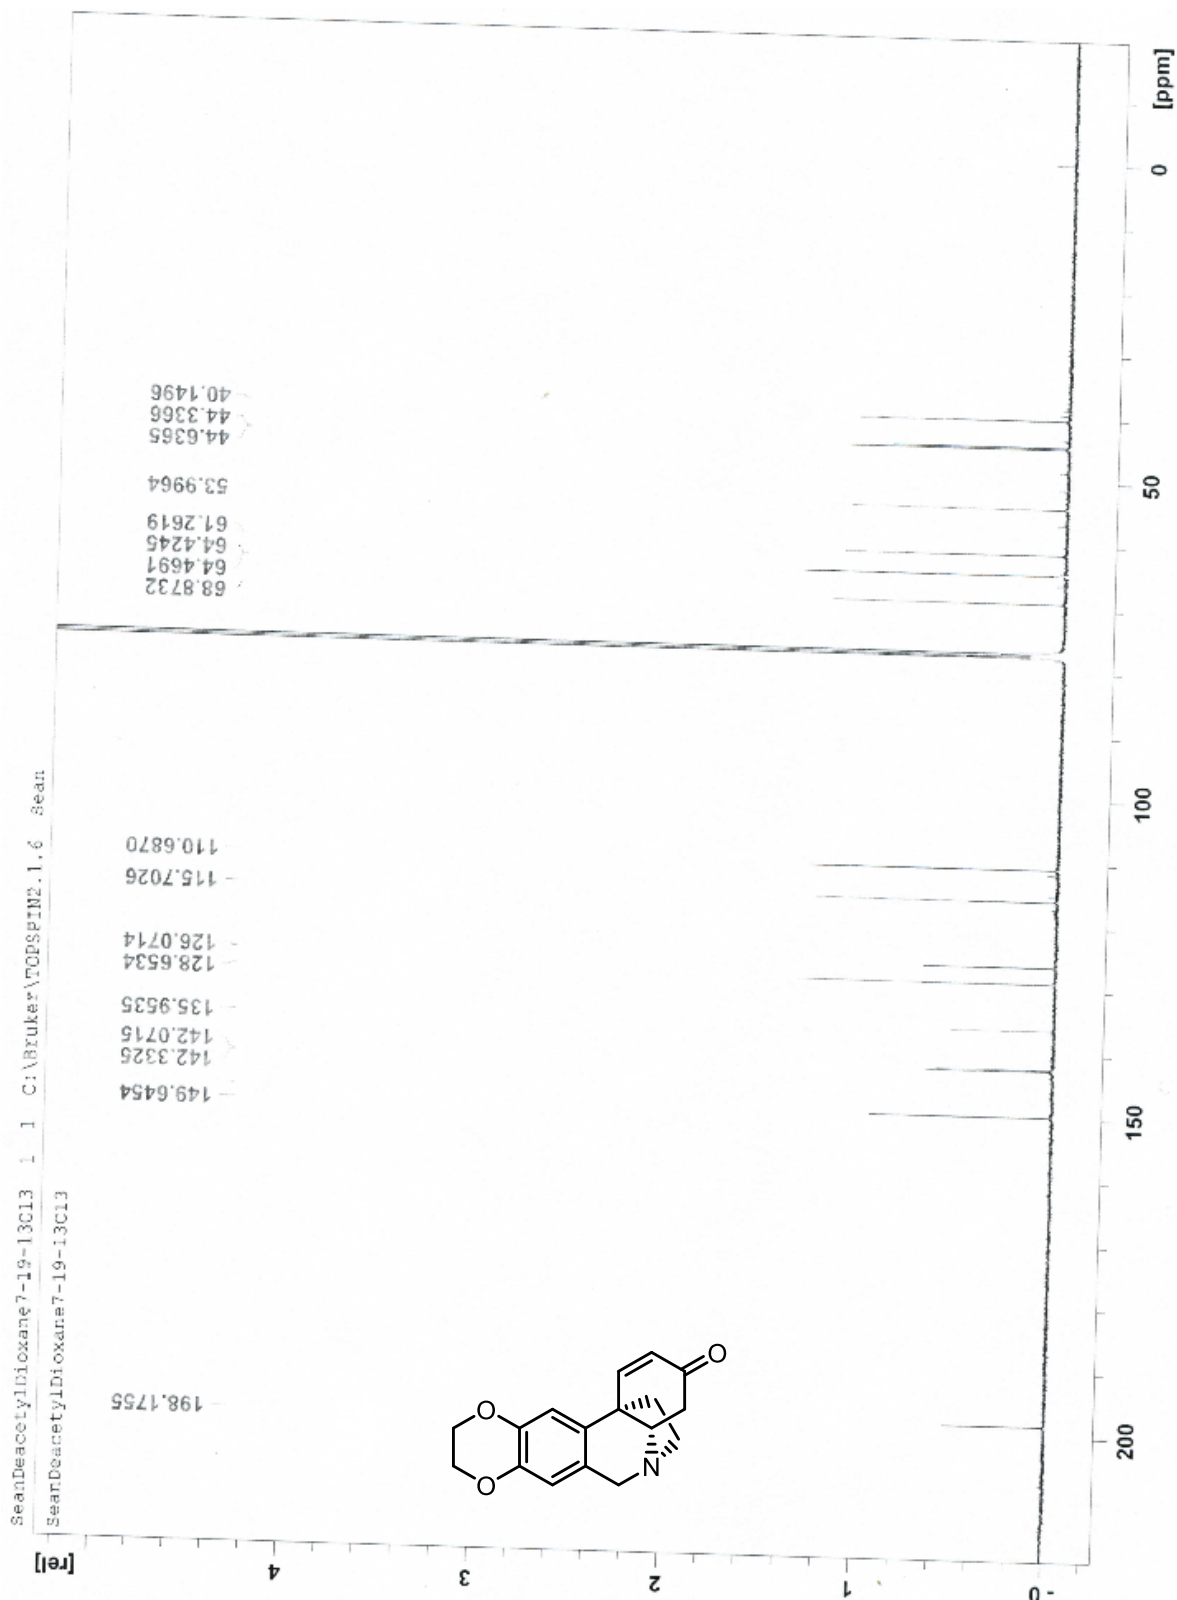

5d

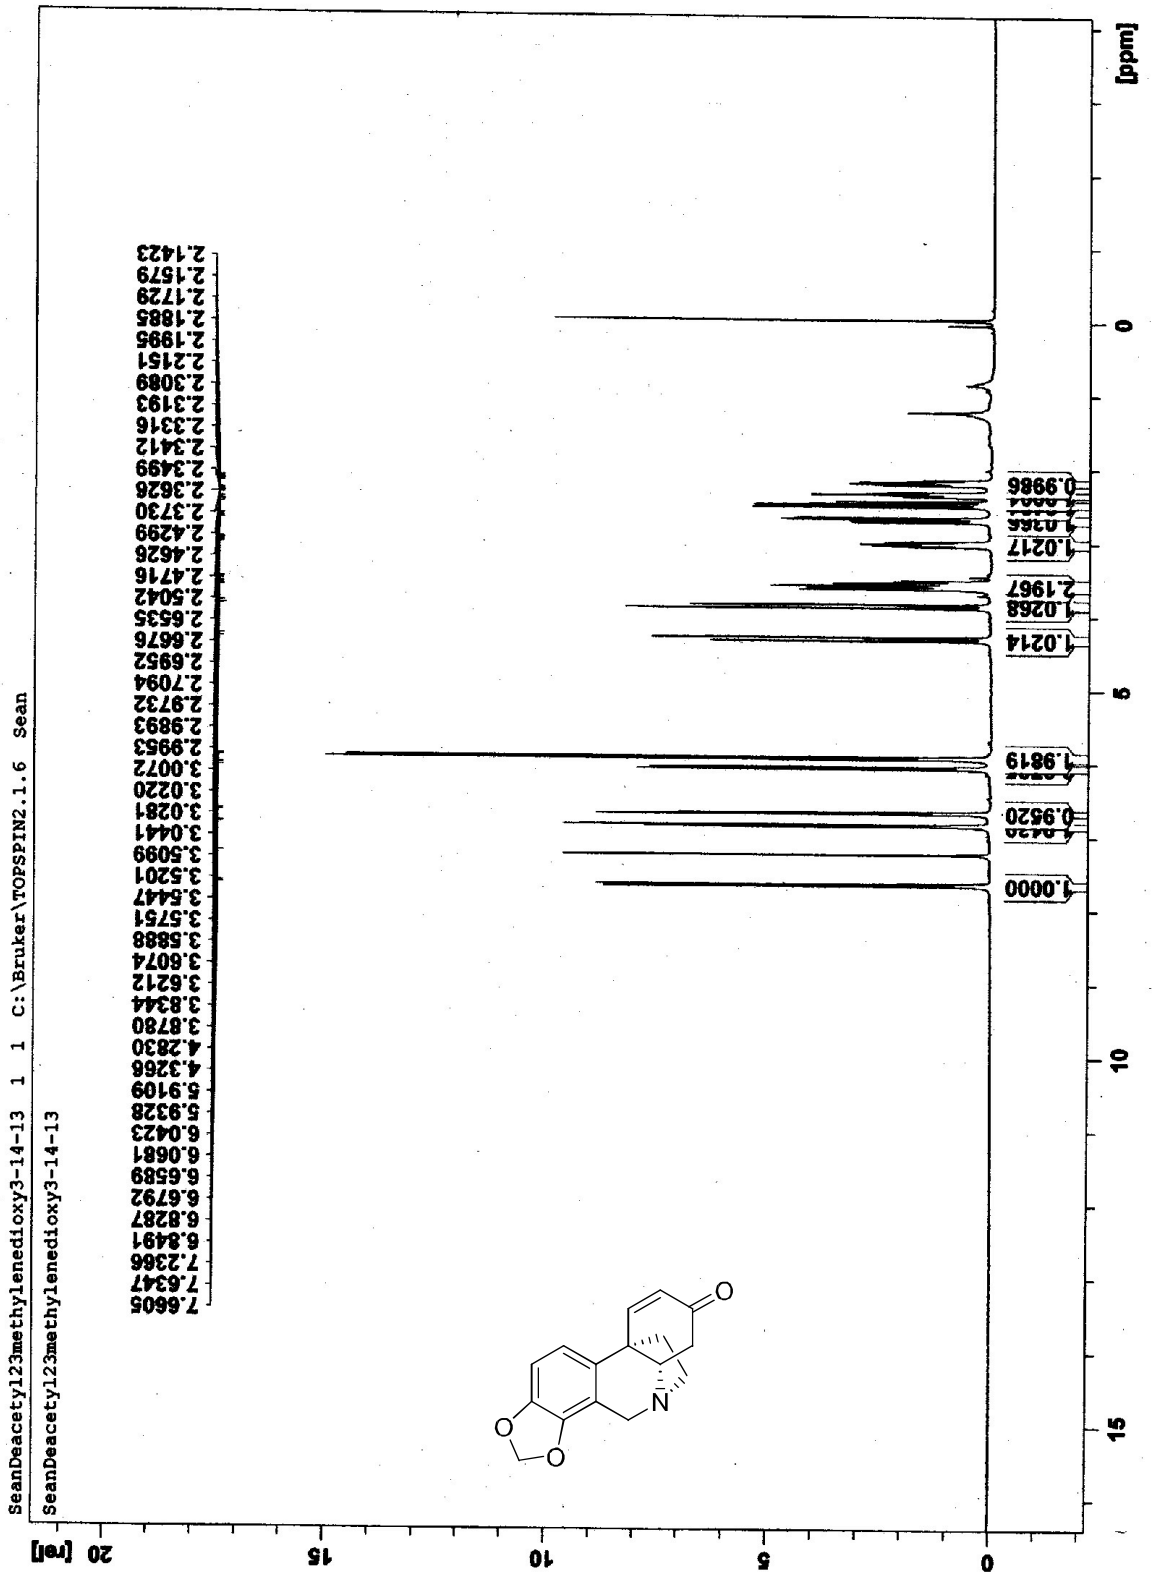



5d

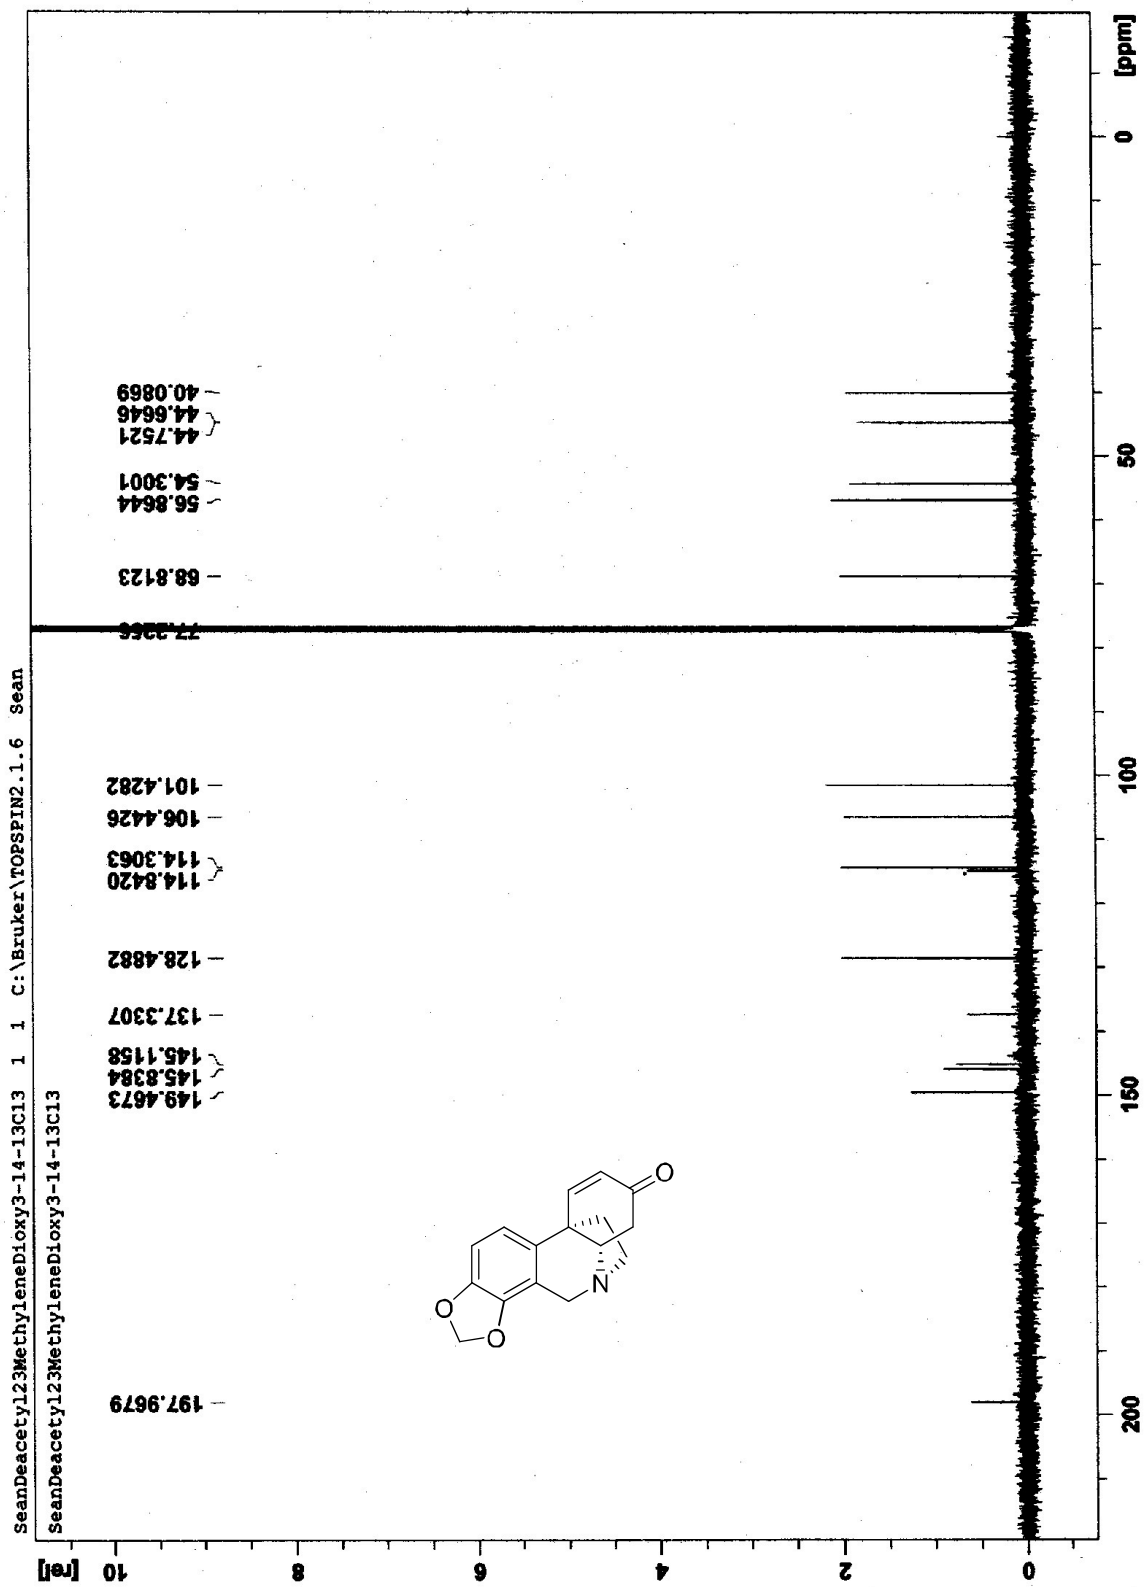

5e

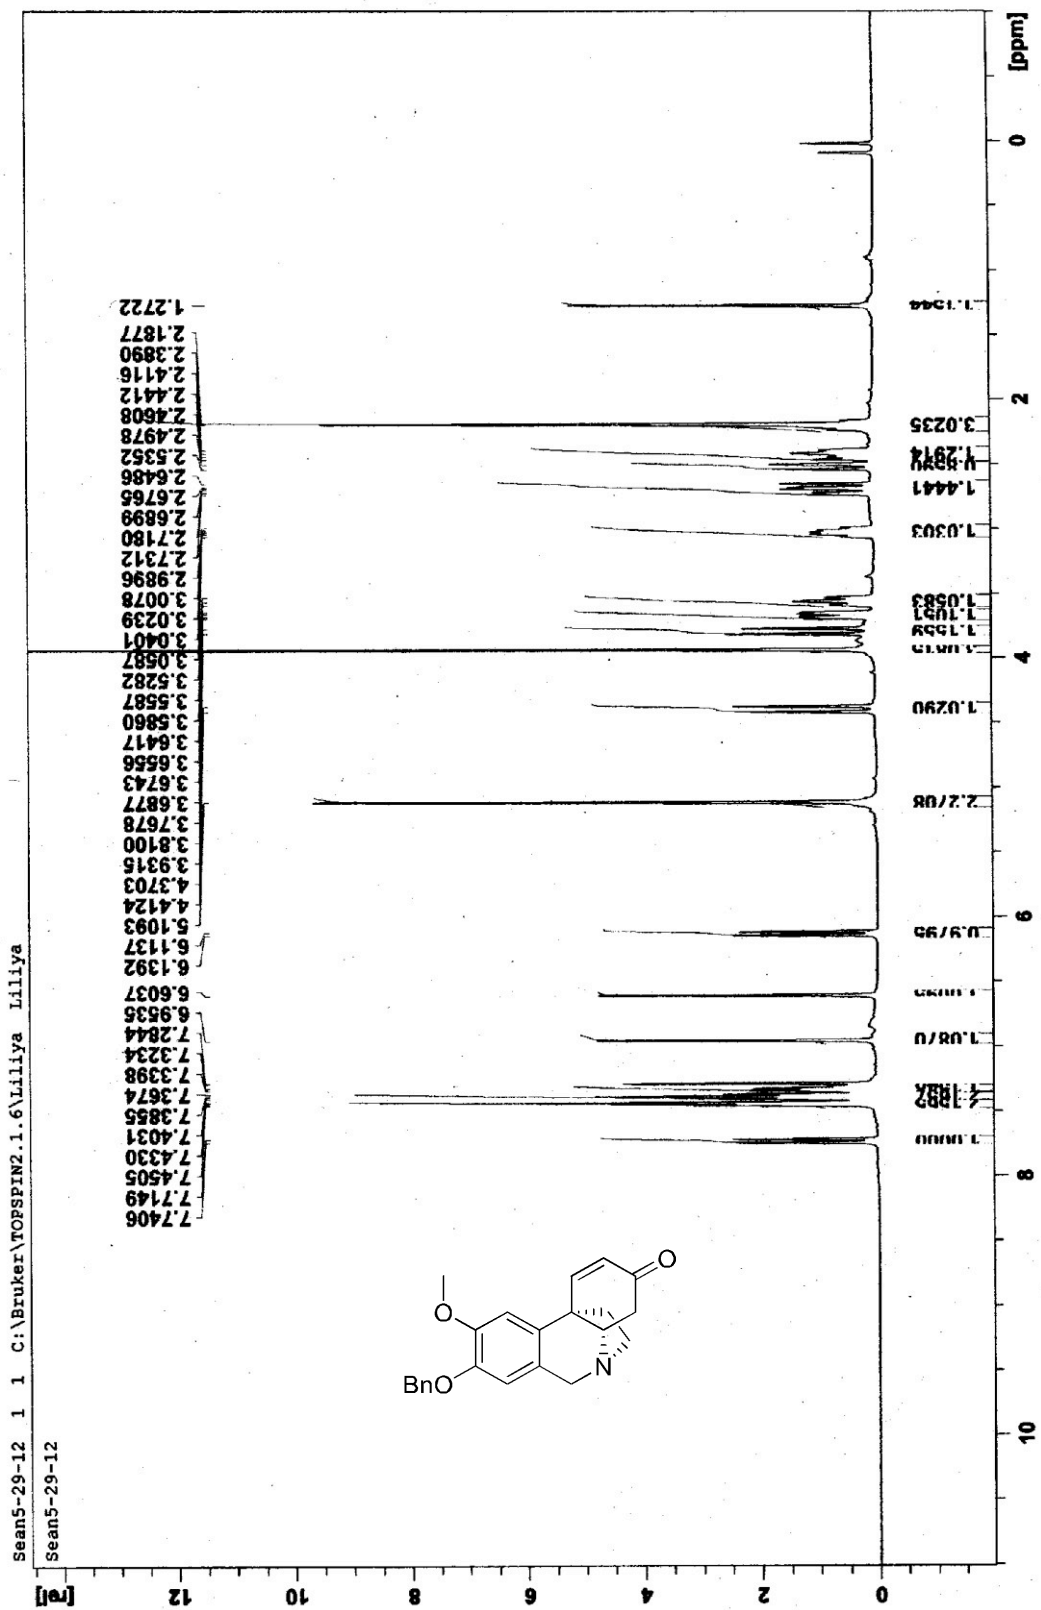

5e

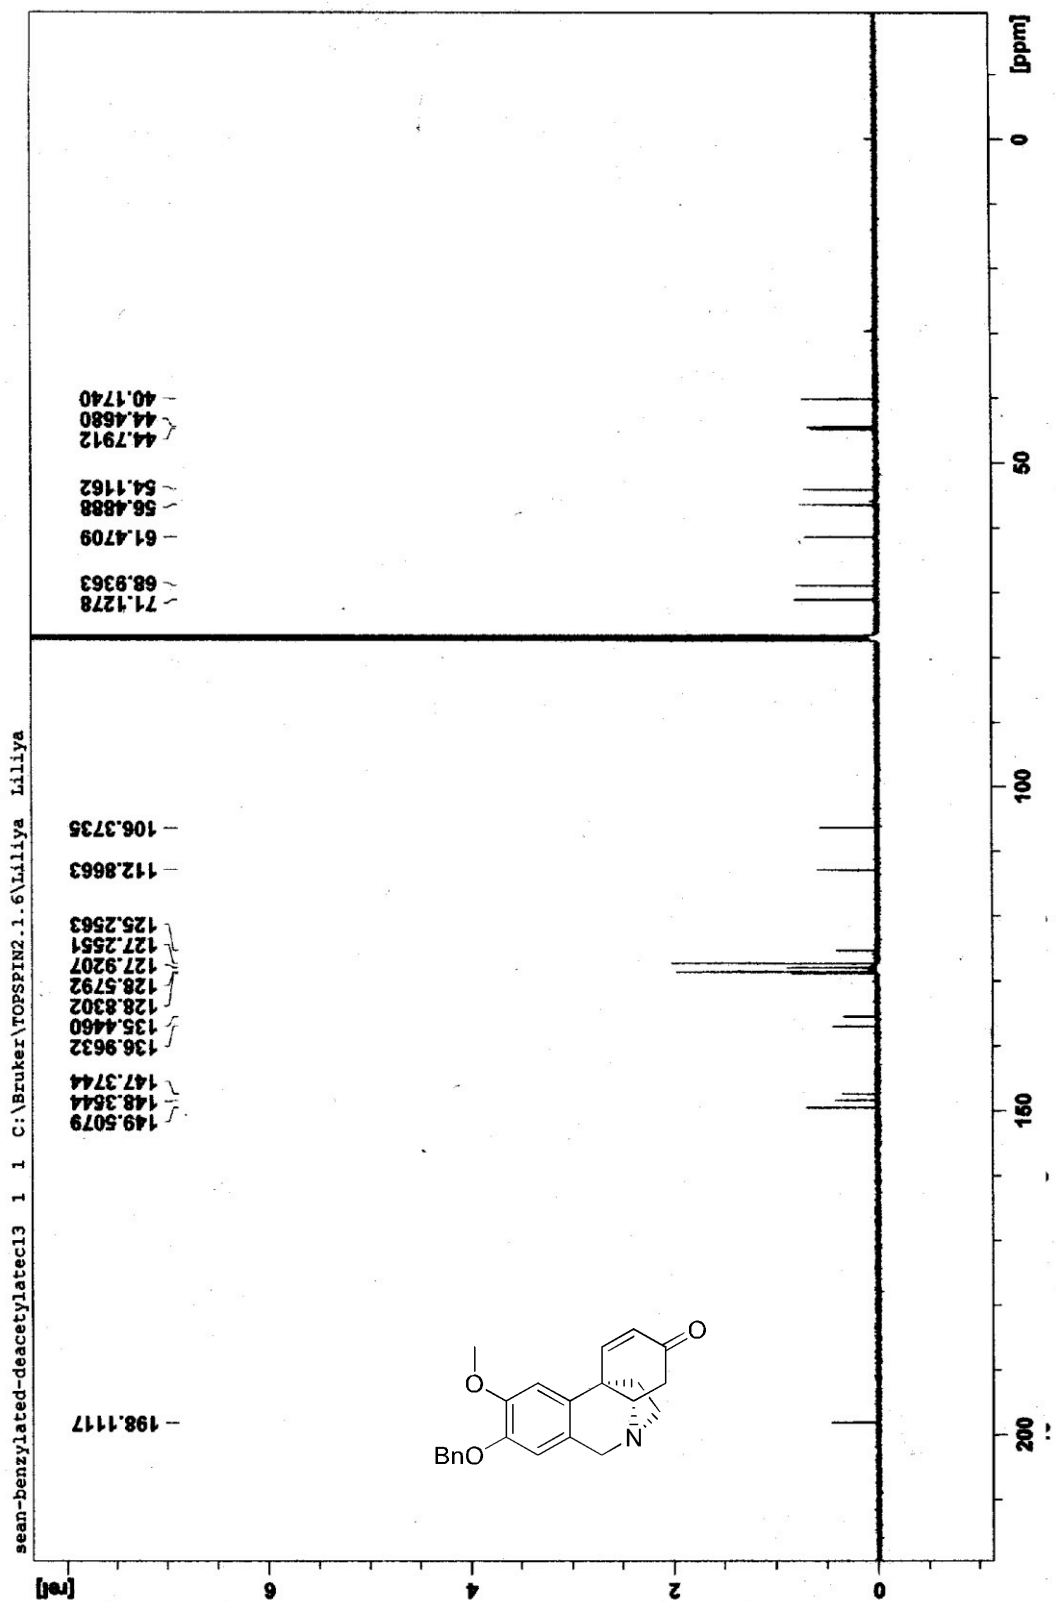

5f

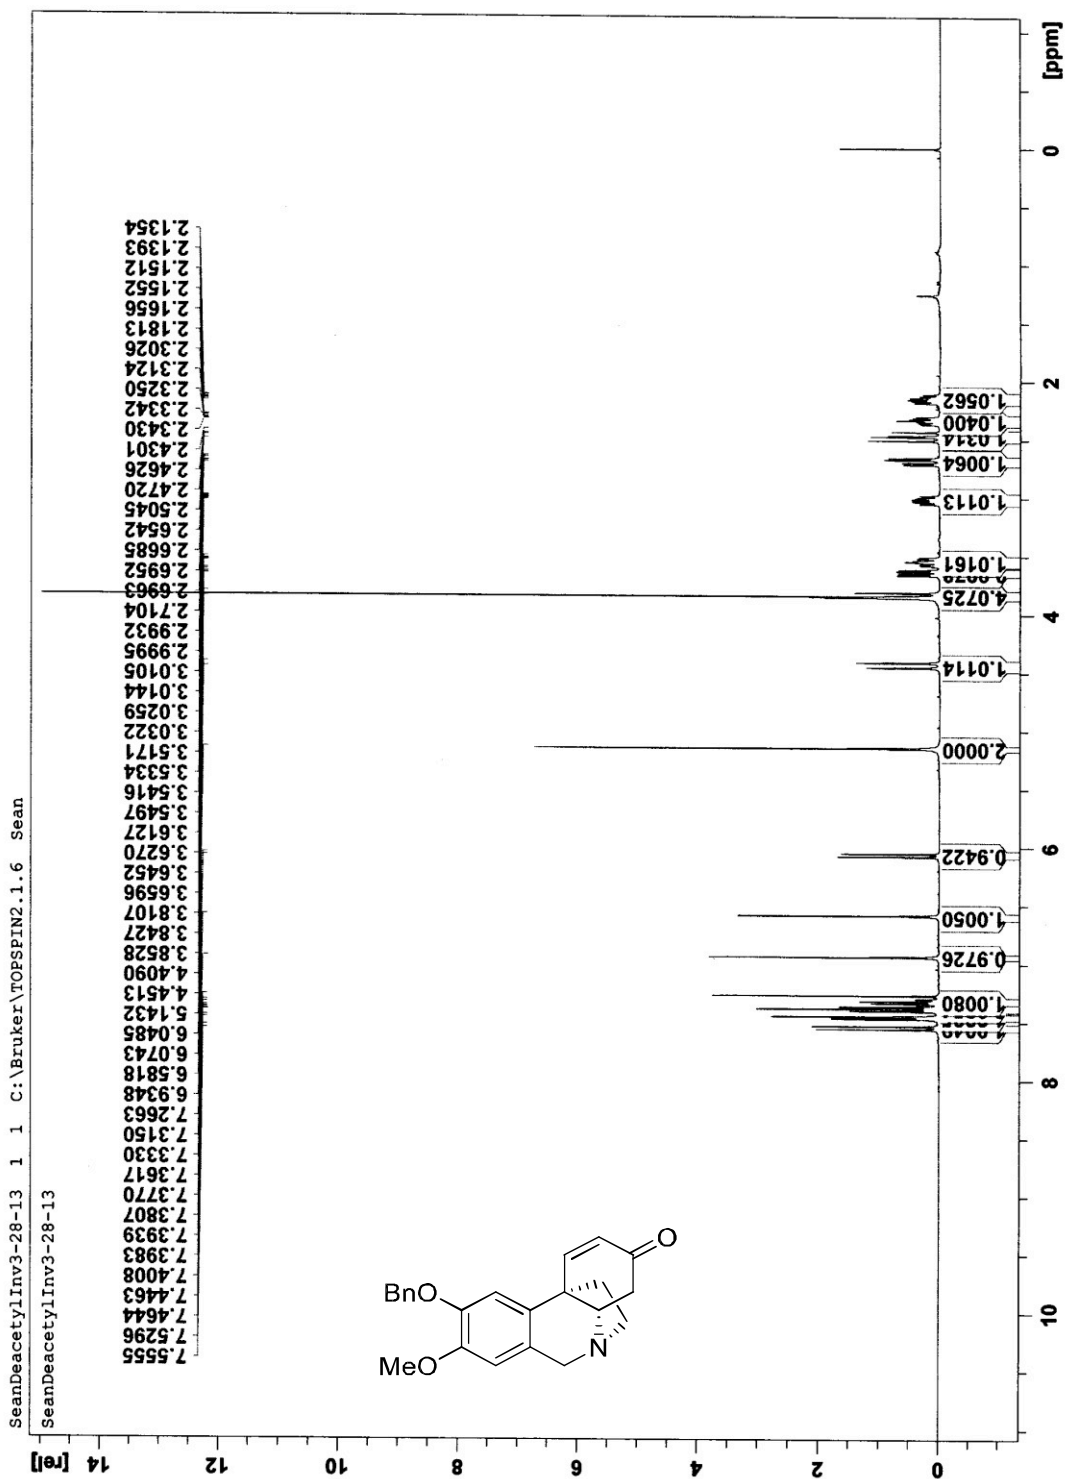

5f

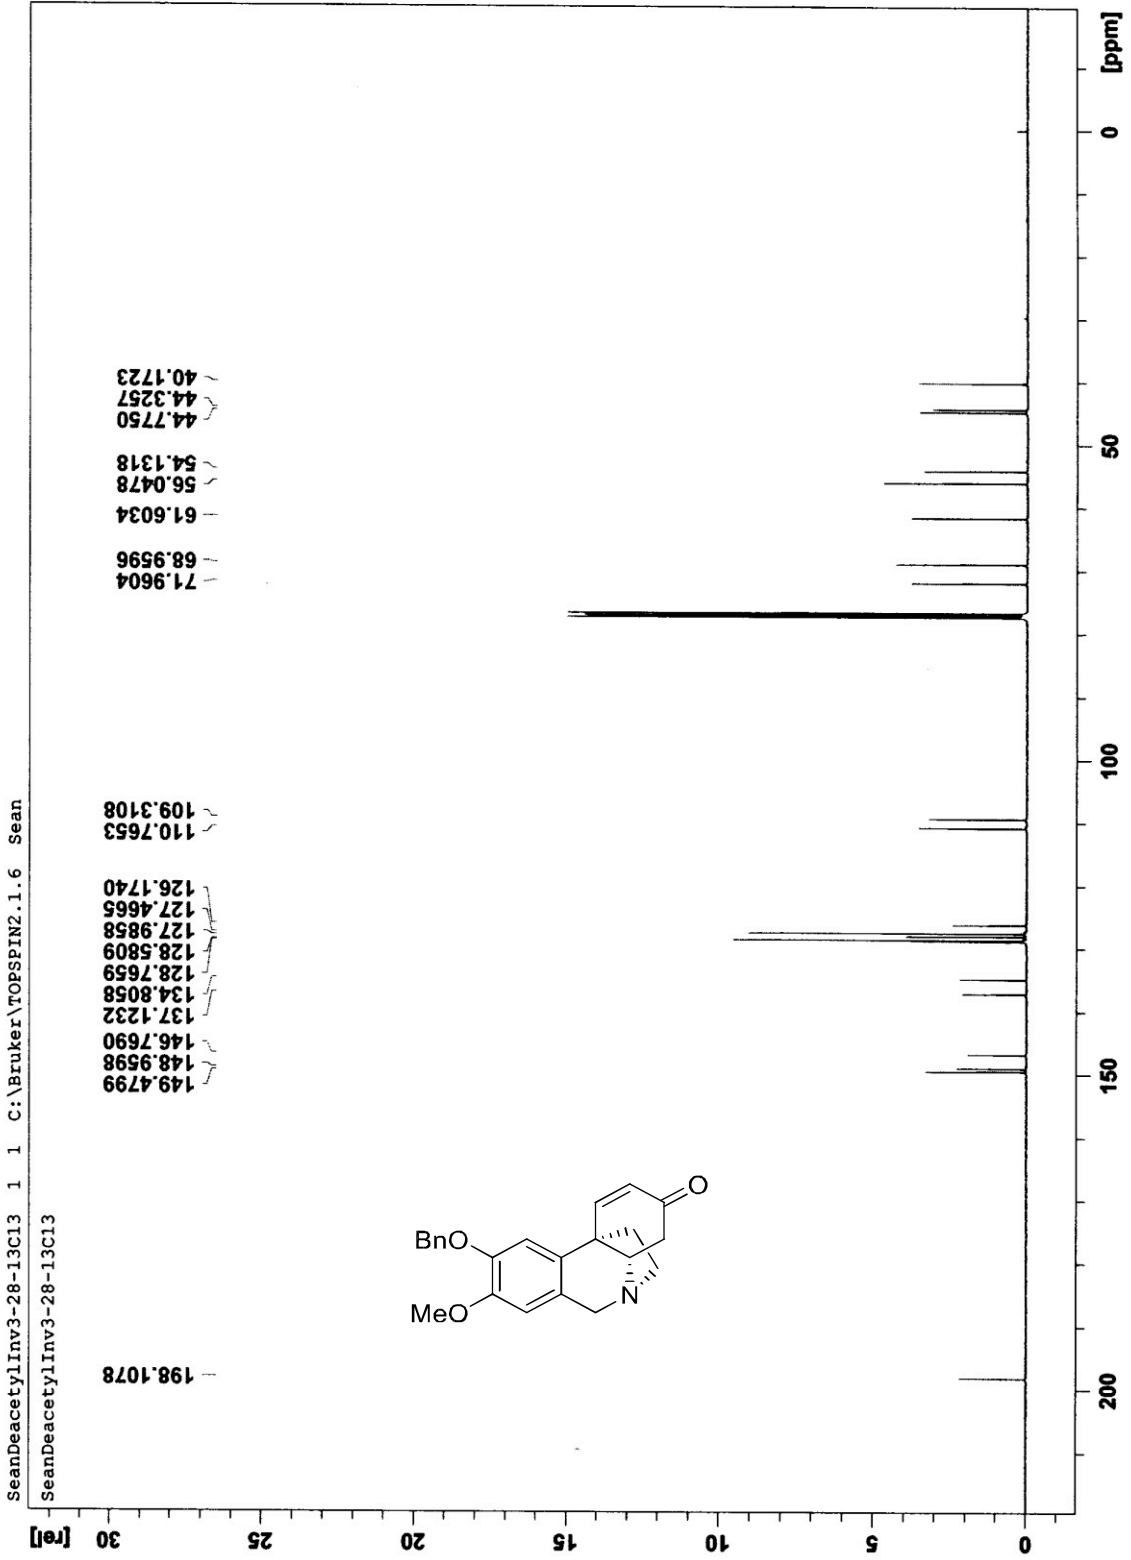

5g

SeanDeacetylDibenz9-14-13 1 1 C:\Bruker\TOPSPIN2.1.6 Sean

SeanDeacetylDibenz9-14-13

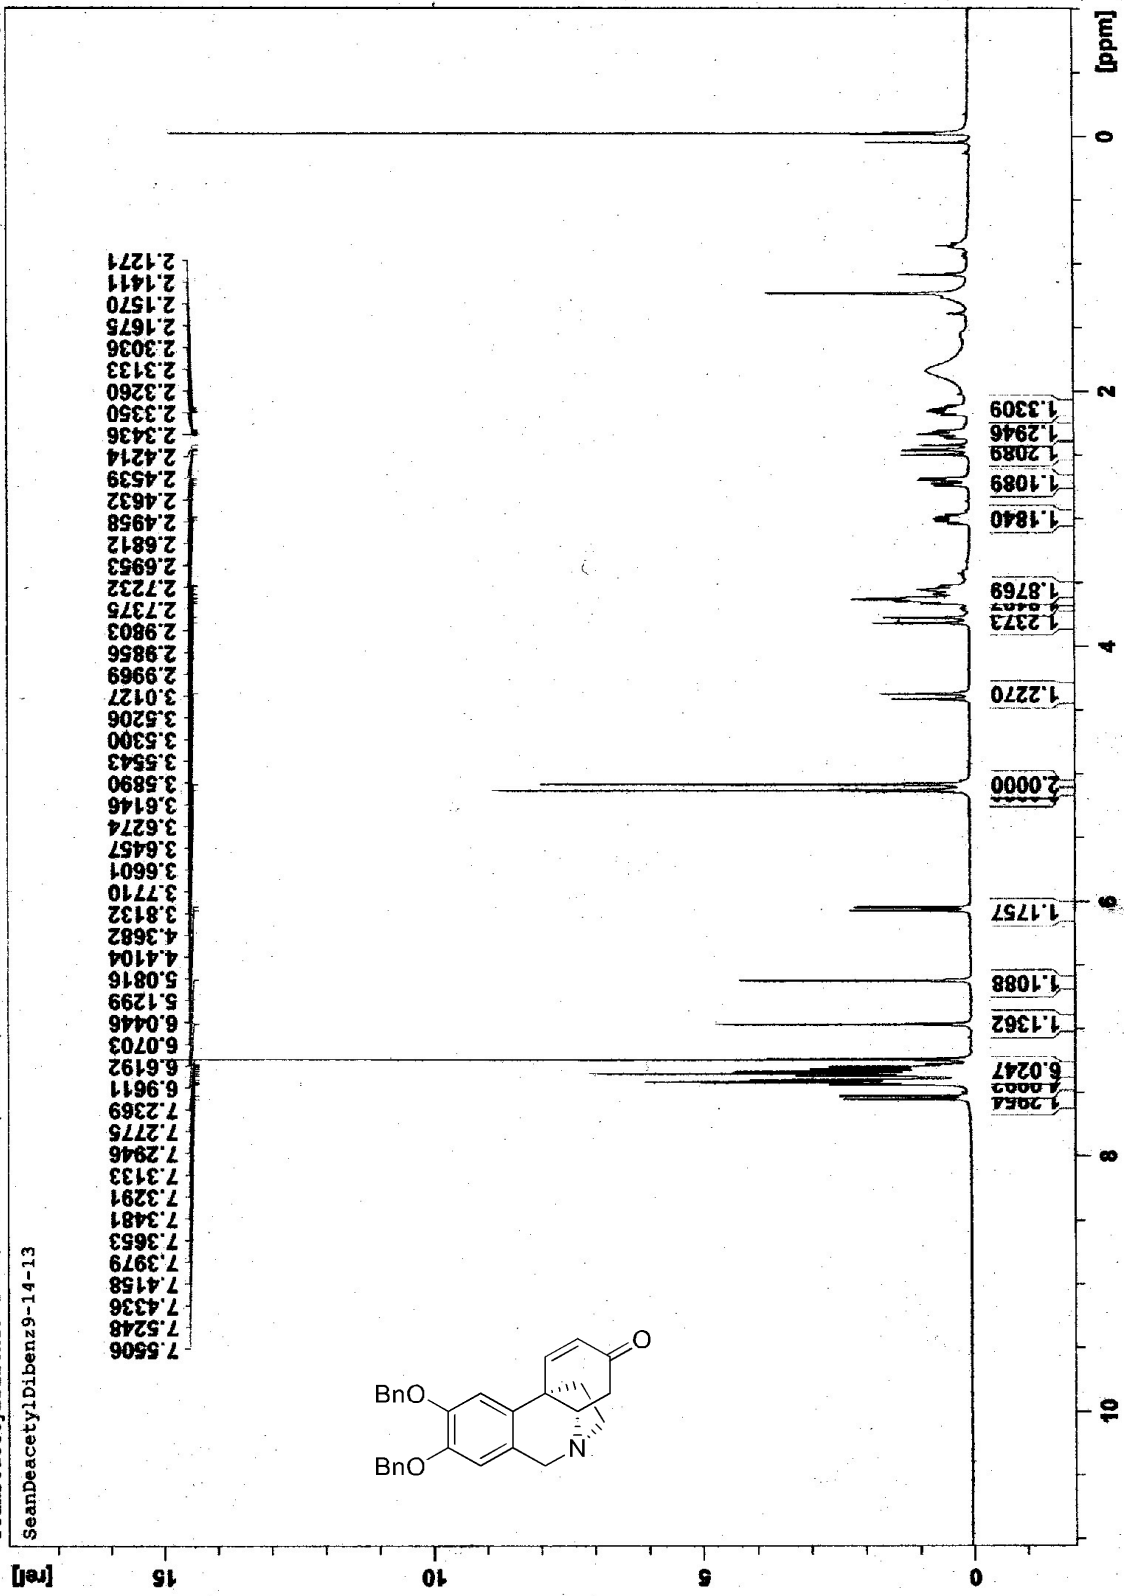

5g

SeanDeacety|Dibenz9-14-13Cl3 1 1 C:\Bruker\TOPSPIN2.1.6 Sean

SeanDeacety|Dibenz9-14-13Cl3

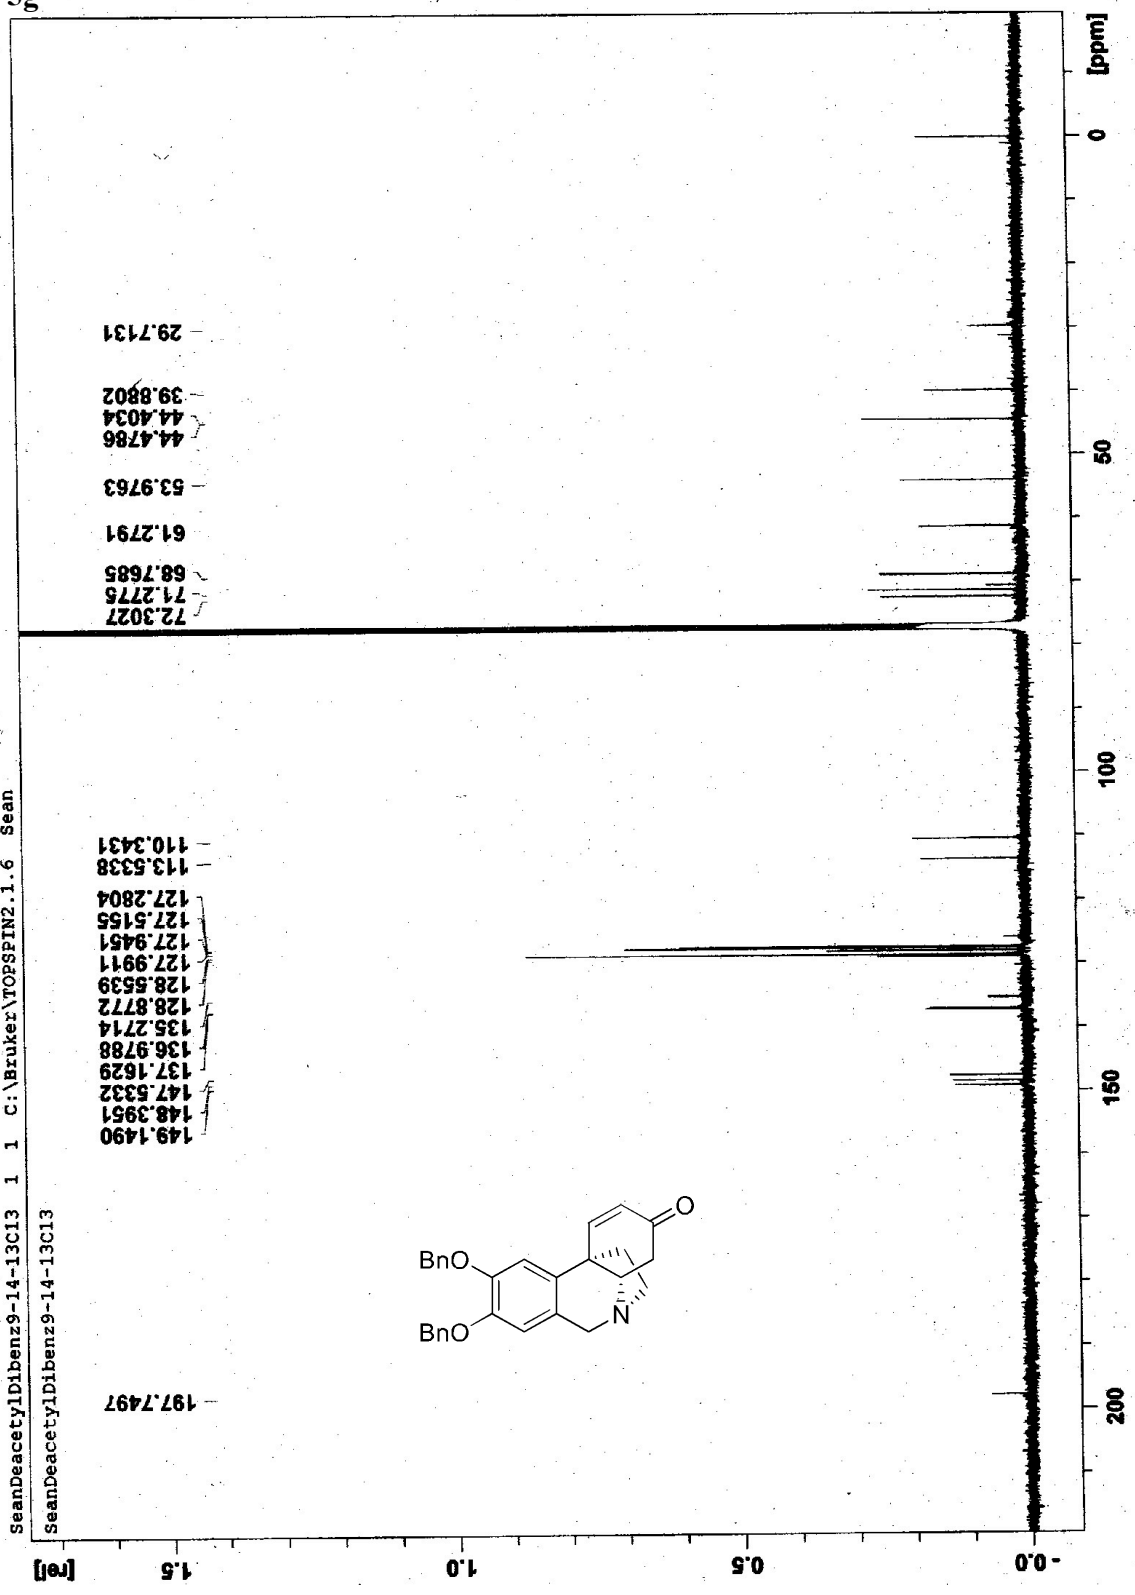

5h

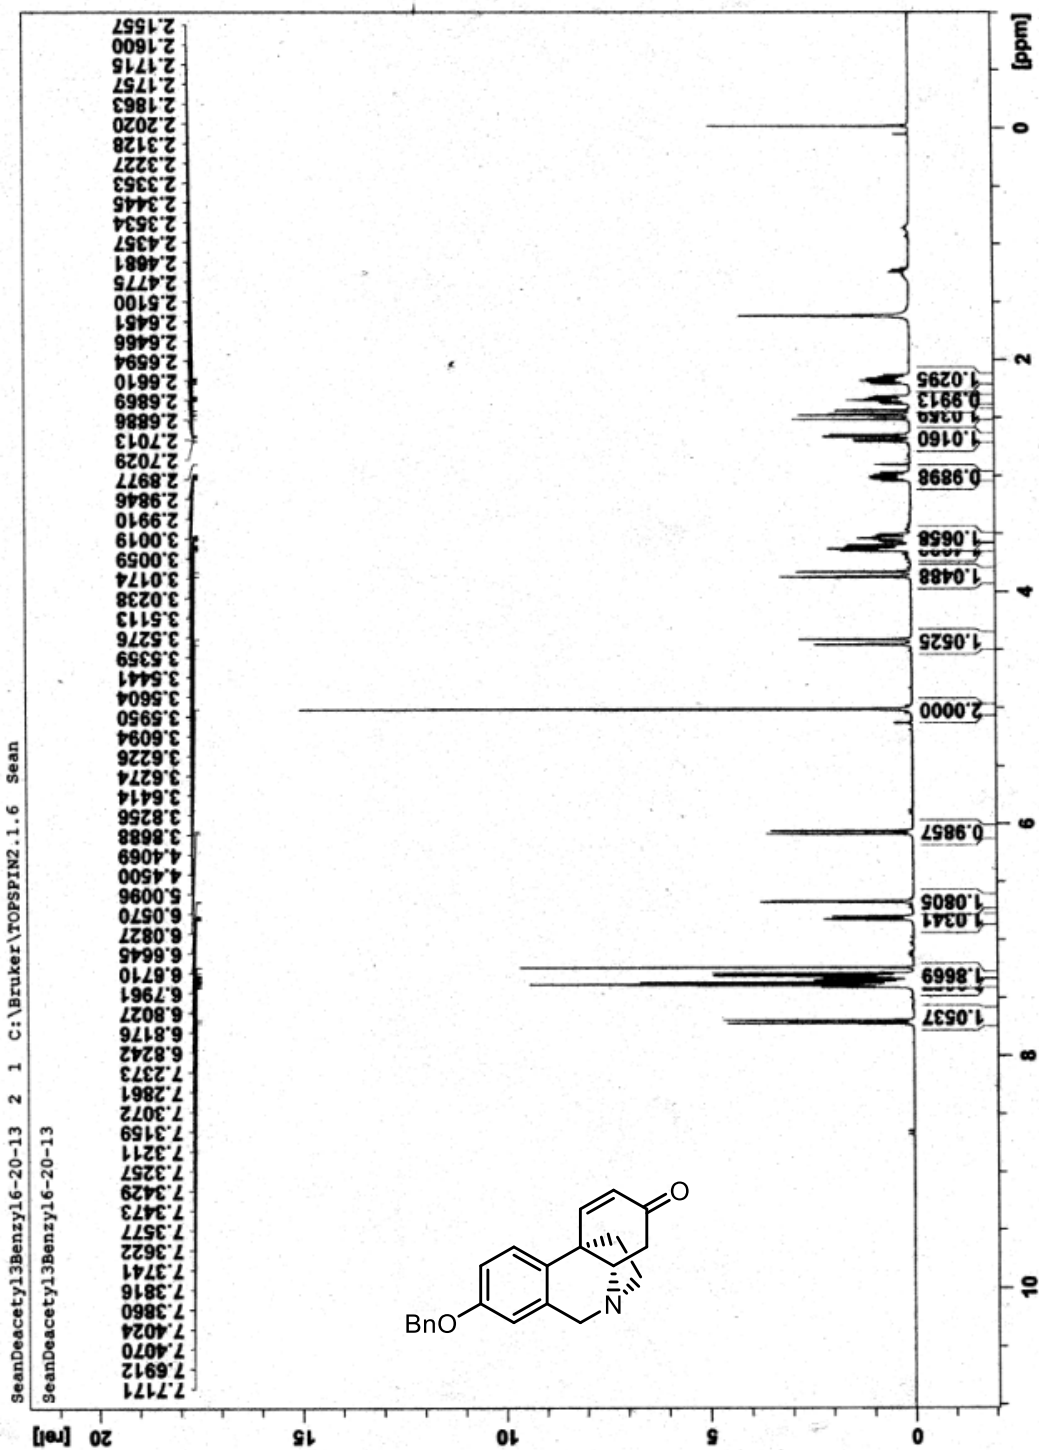



5h

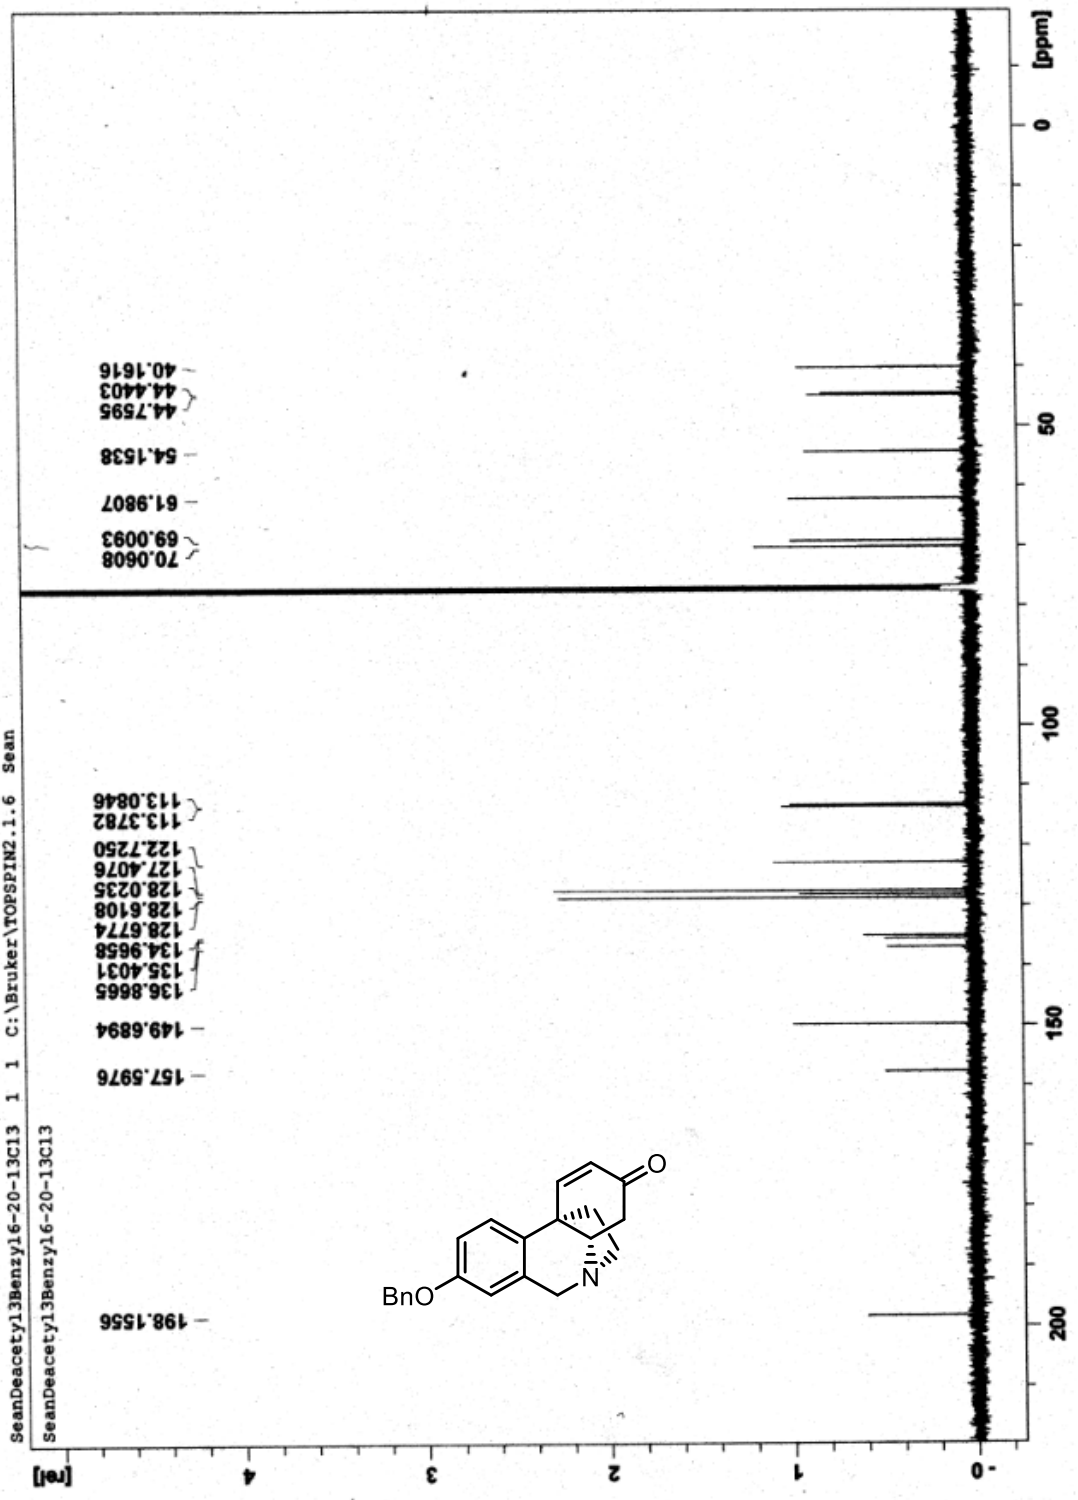

5i

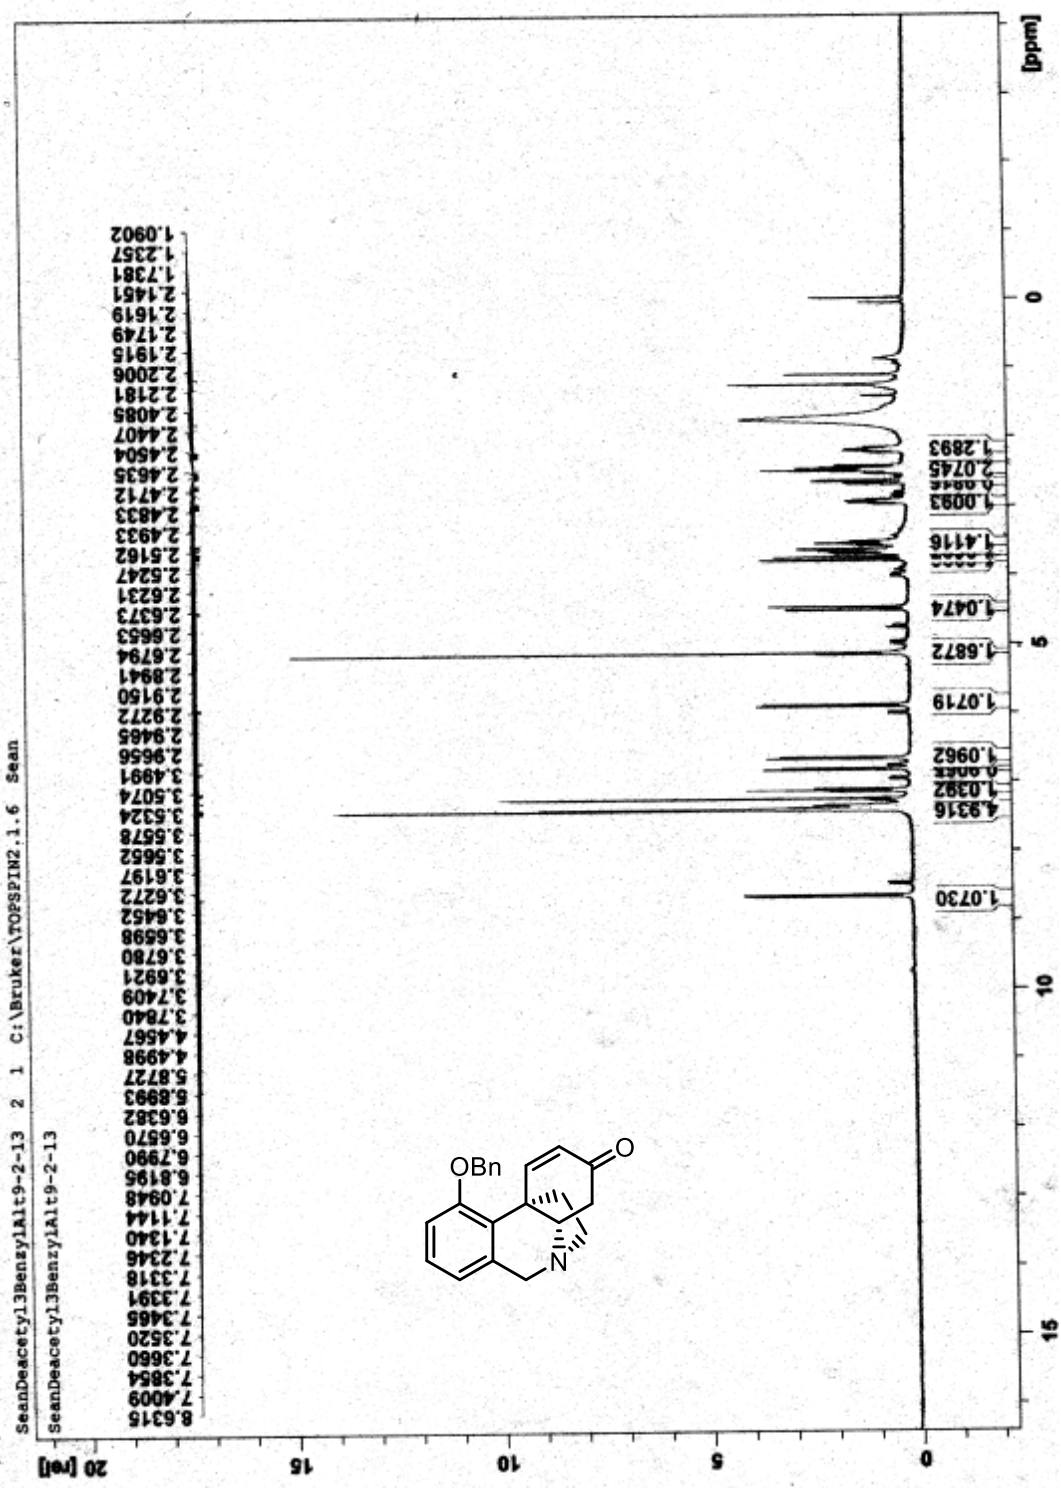

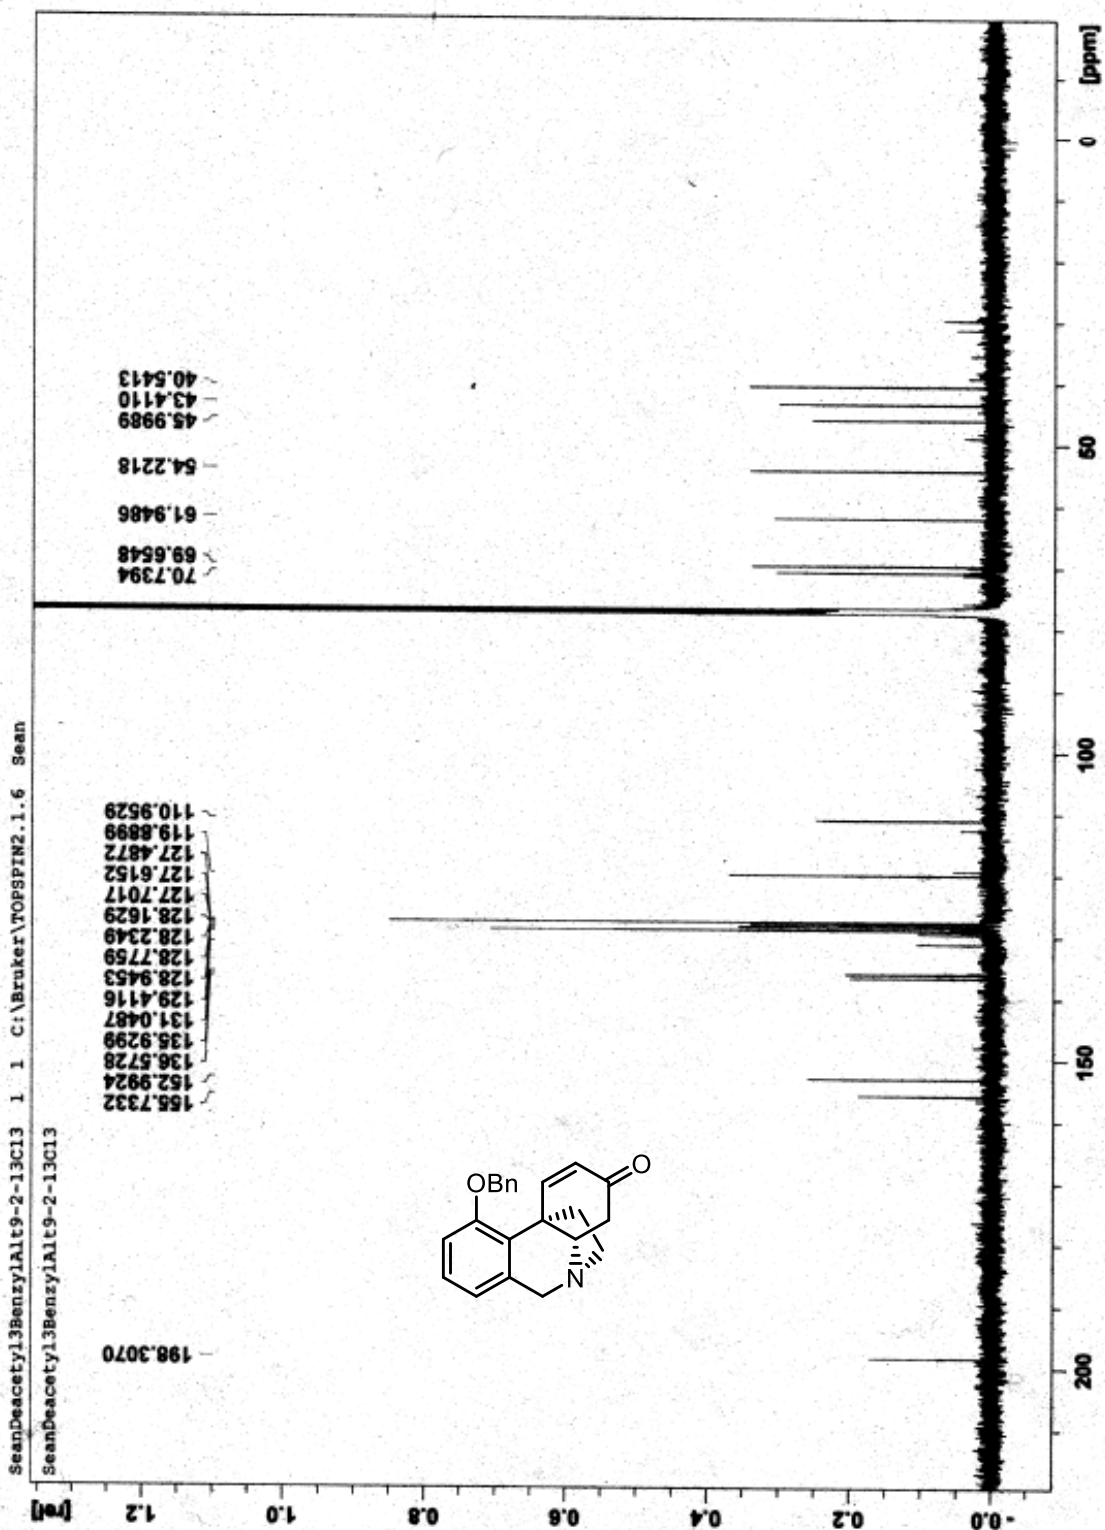

5j

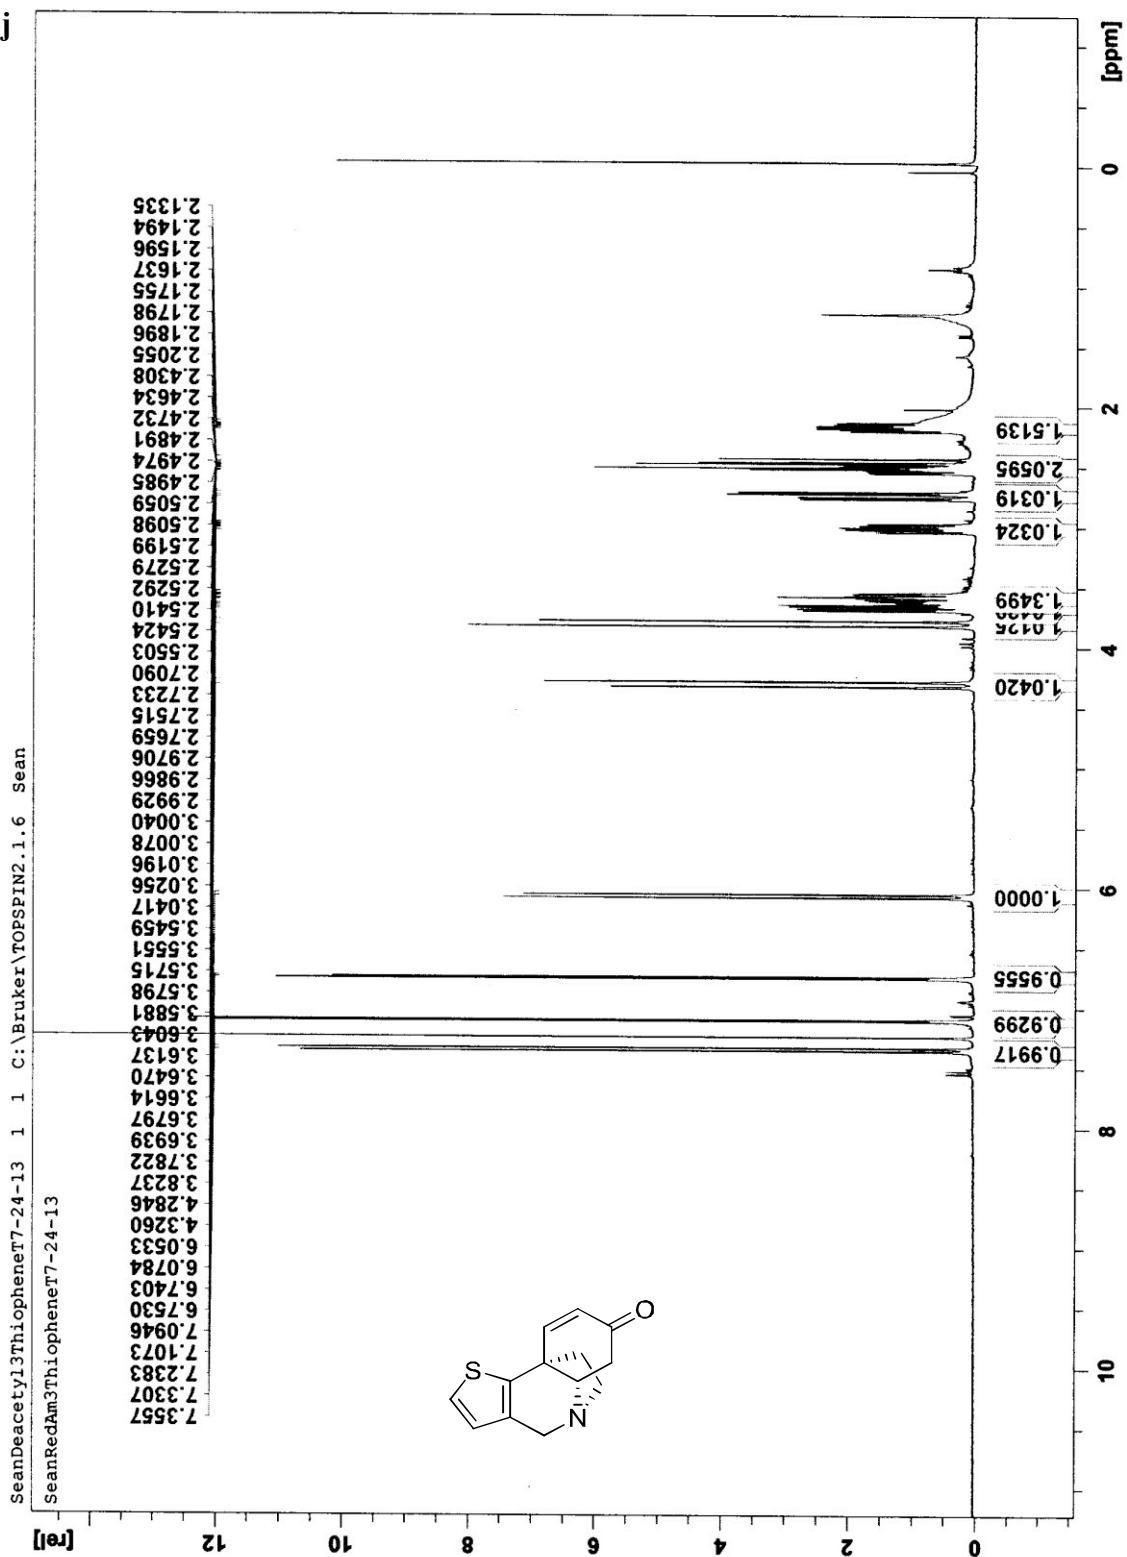

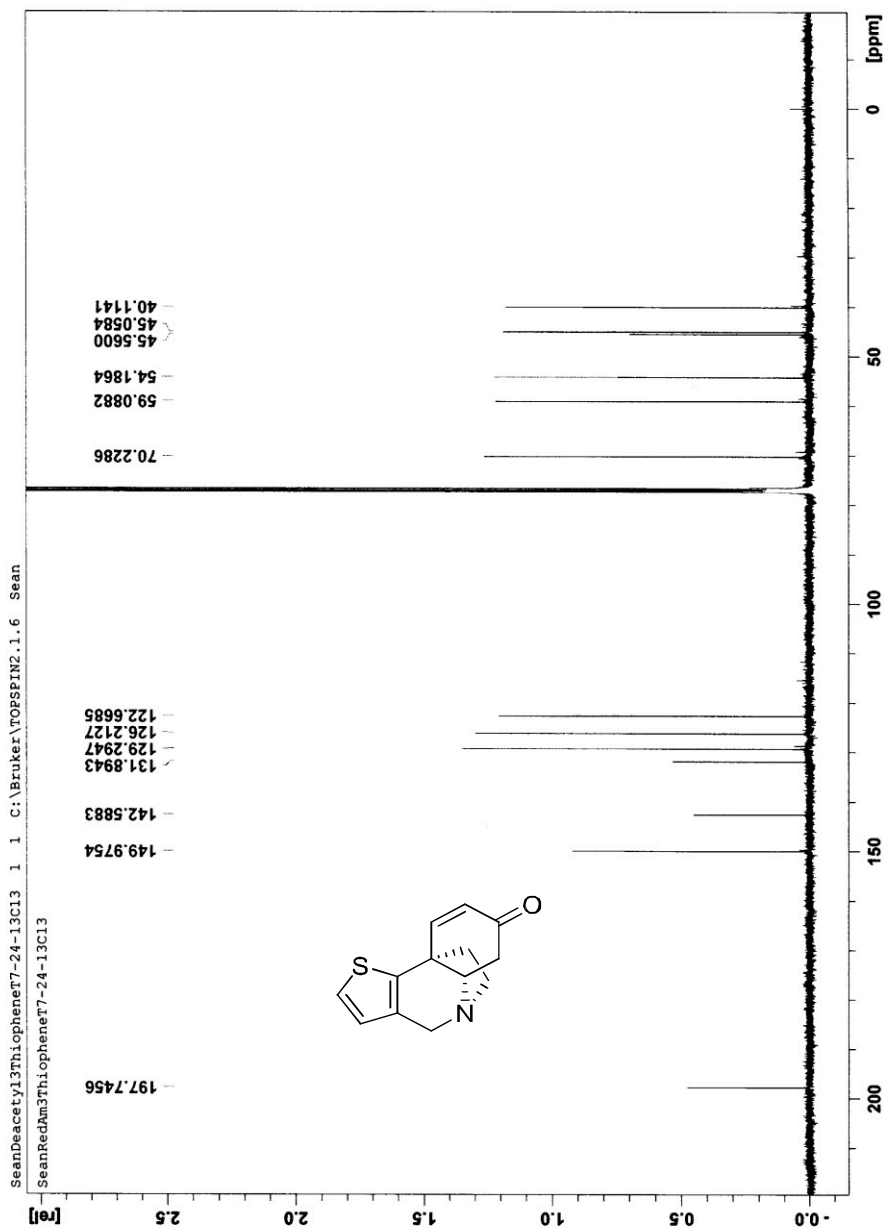

5k

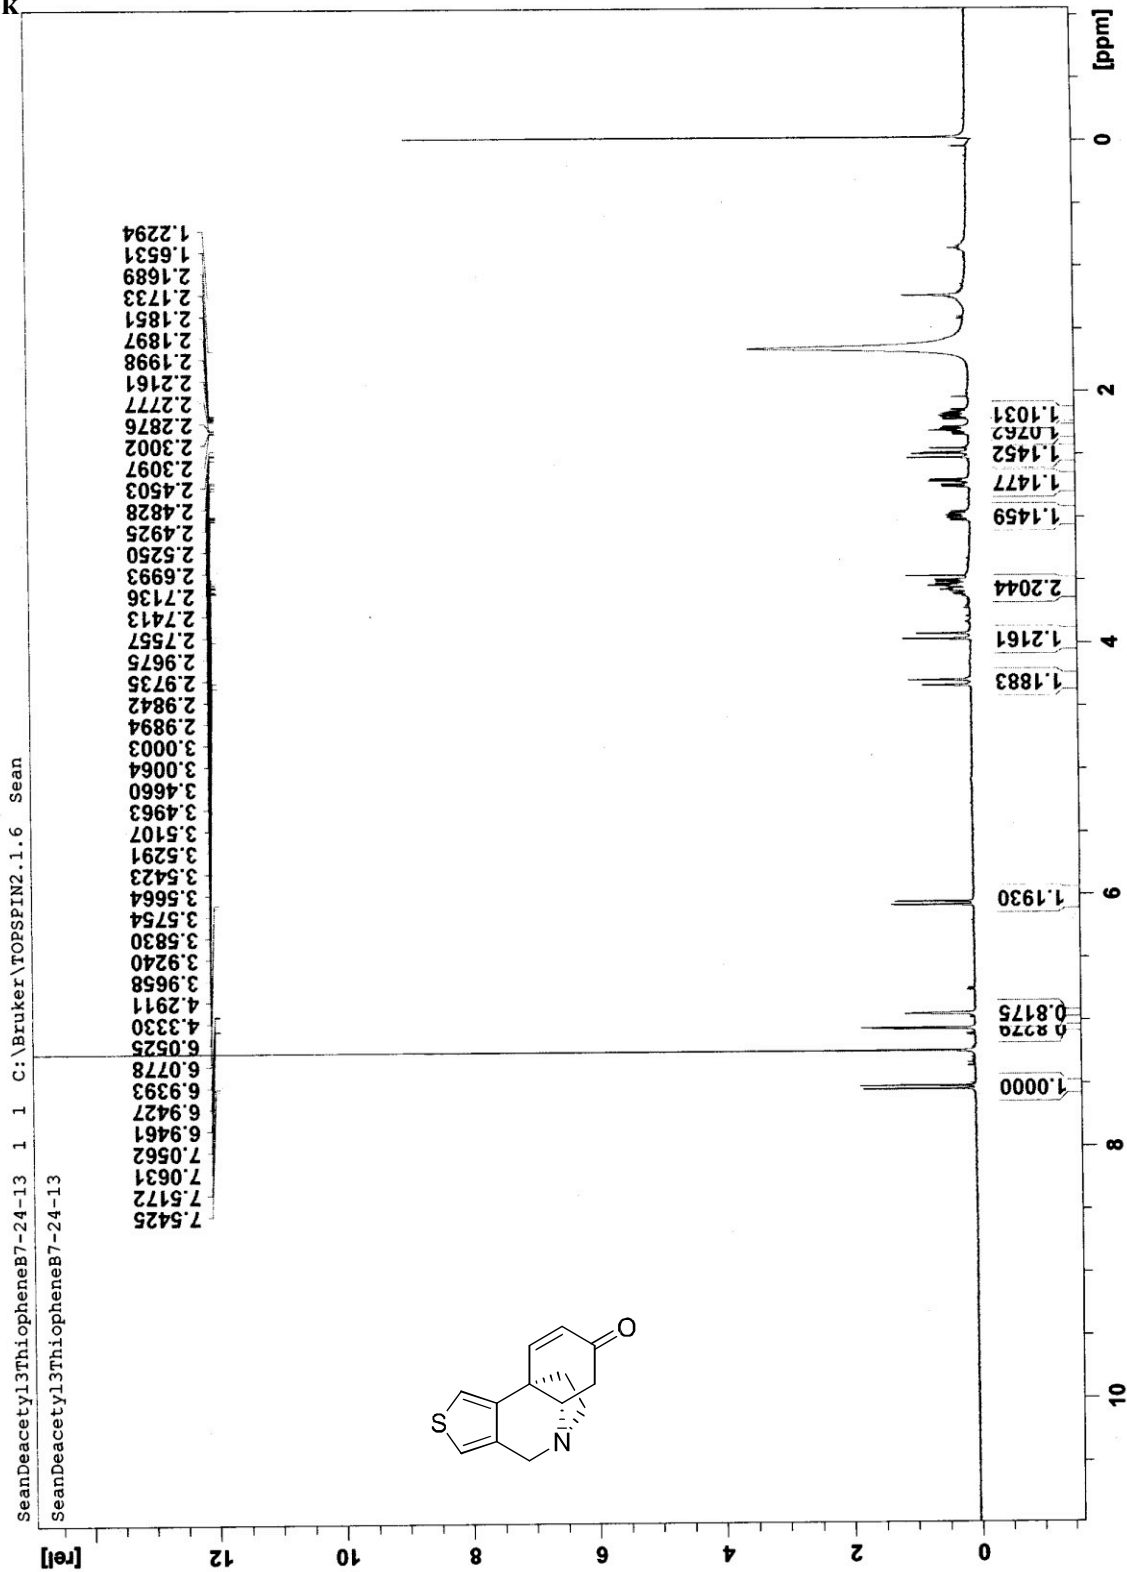

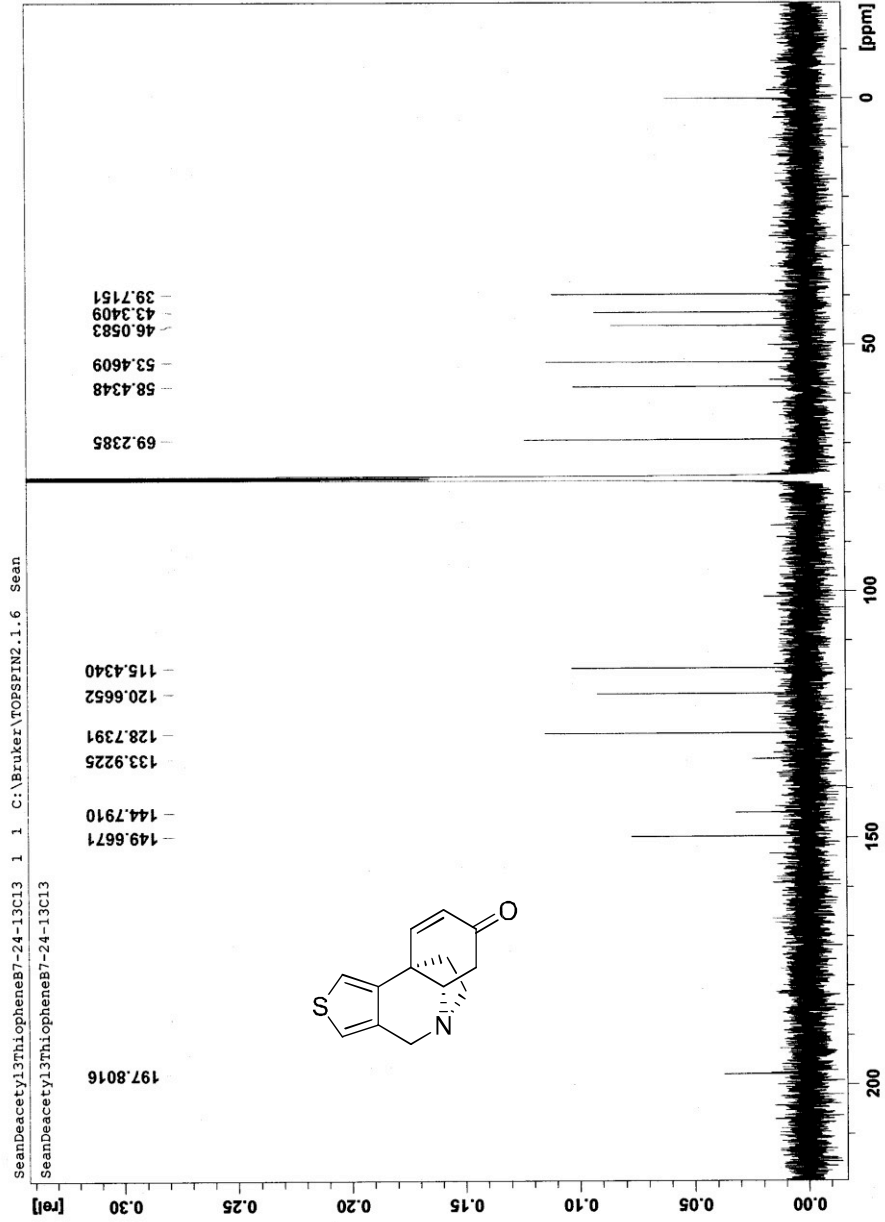

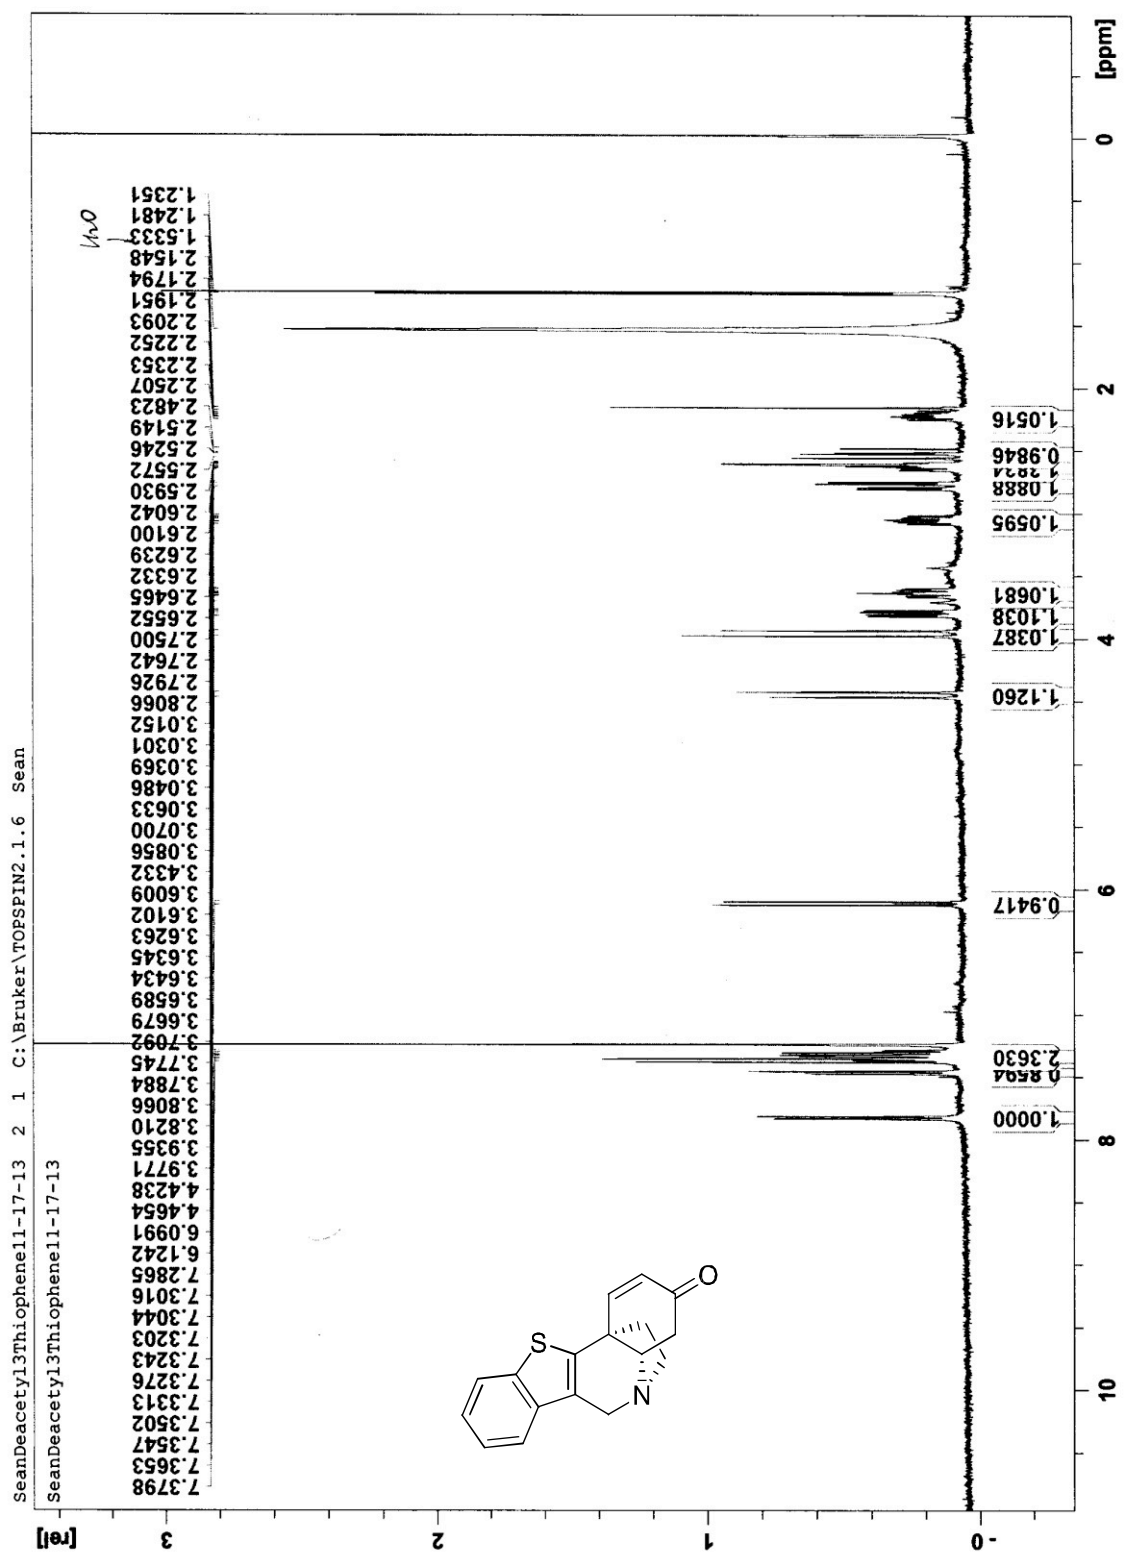



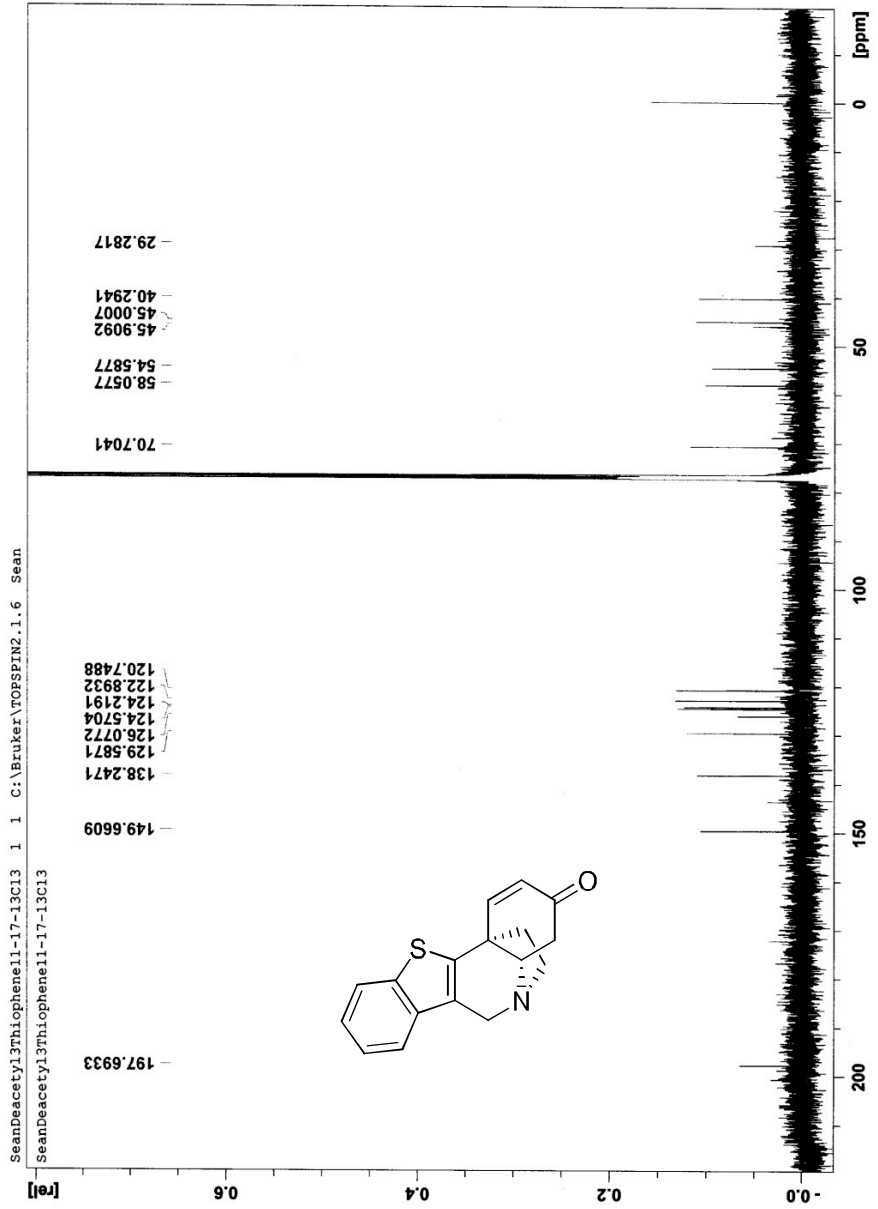

5n

0.865  
0.880  
1.258  
2.047  
2.230  
2.246  
2.275  
2.458  
2.489  
2.509  
2.530  
2.567  
2.722  
2.735  
2.764  
2.776  
3.058  
3.075  
3.090  
3.574  
3.605  
3.629  
3.712  
3.725  
3.746  
3.758  
3.854  
3.894  
4.438  
4.480

6.133  
6.158

6.879  
7.045  
7.263  
7.495  
7.515  
7.533  
7.643  
7.716  
7.741  
8.189  
8.209

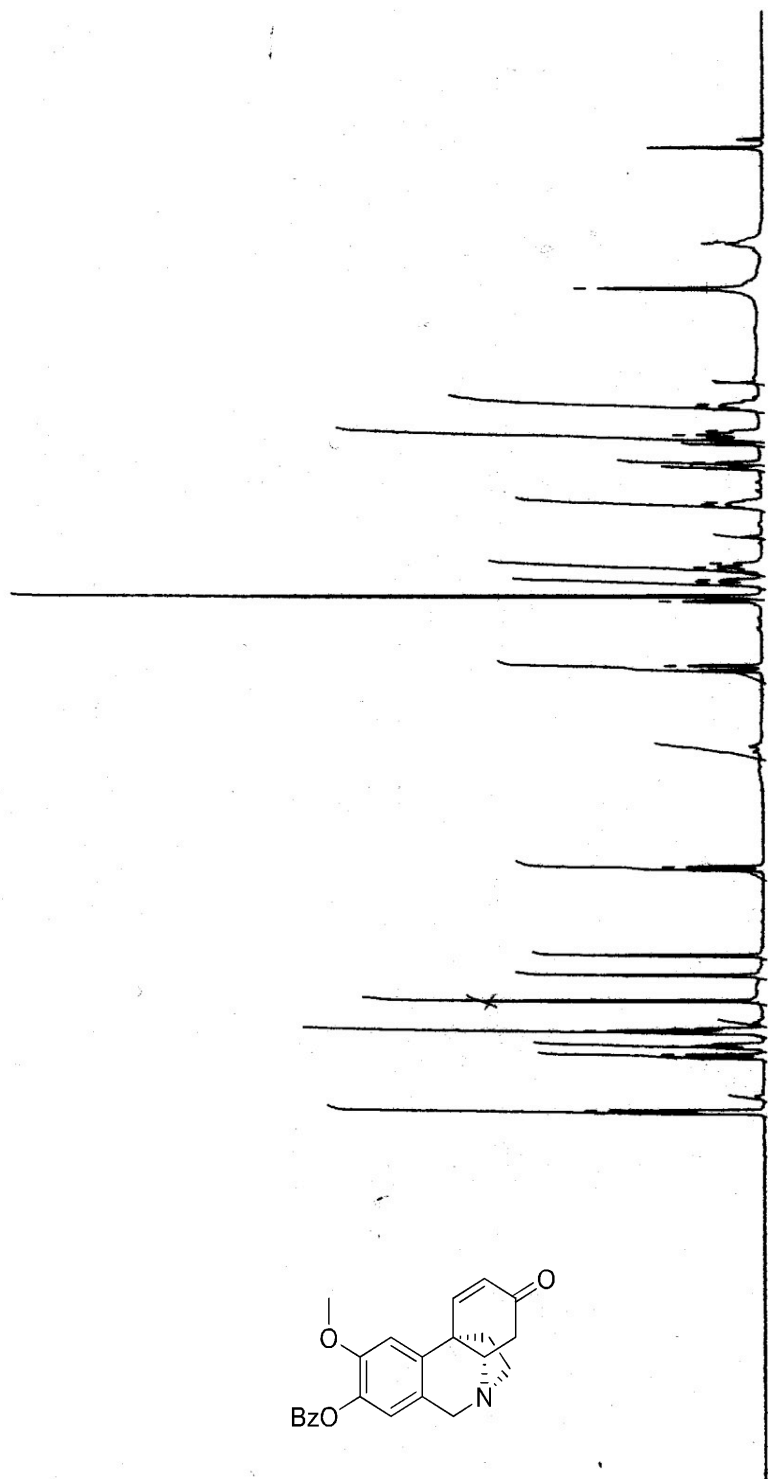

0.22  
1.26  
1.70  
0.34  
0.59  
0.42  
0.99  
0.21  
1.10  
1.00  
3.00  
1.07  
0.44  
0.99  
0.99  
1.00  
1.61  
0.20  
1.84  
0.92  
0.91  
0.15  
1.75

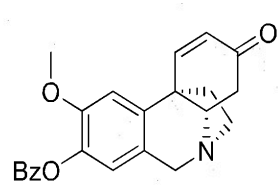

5n

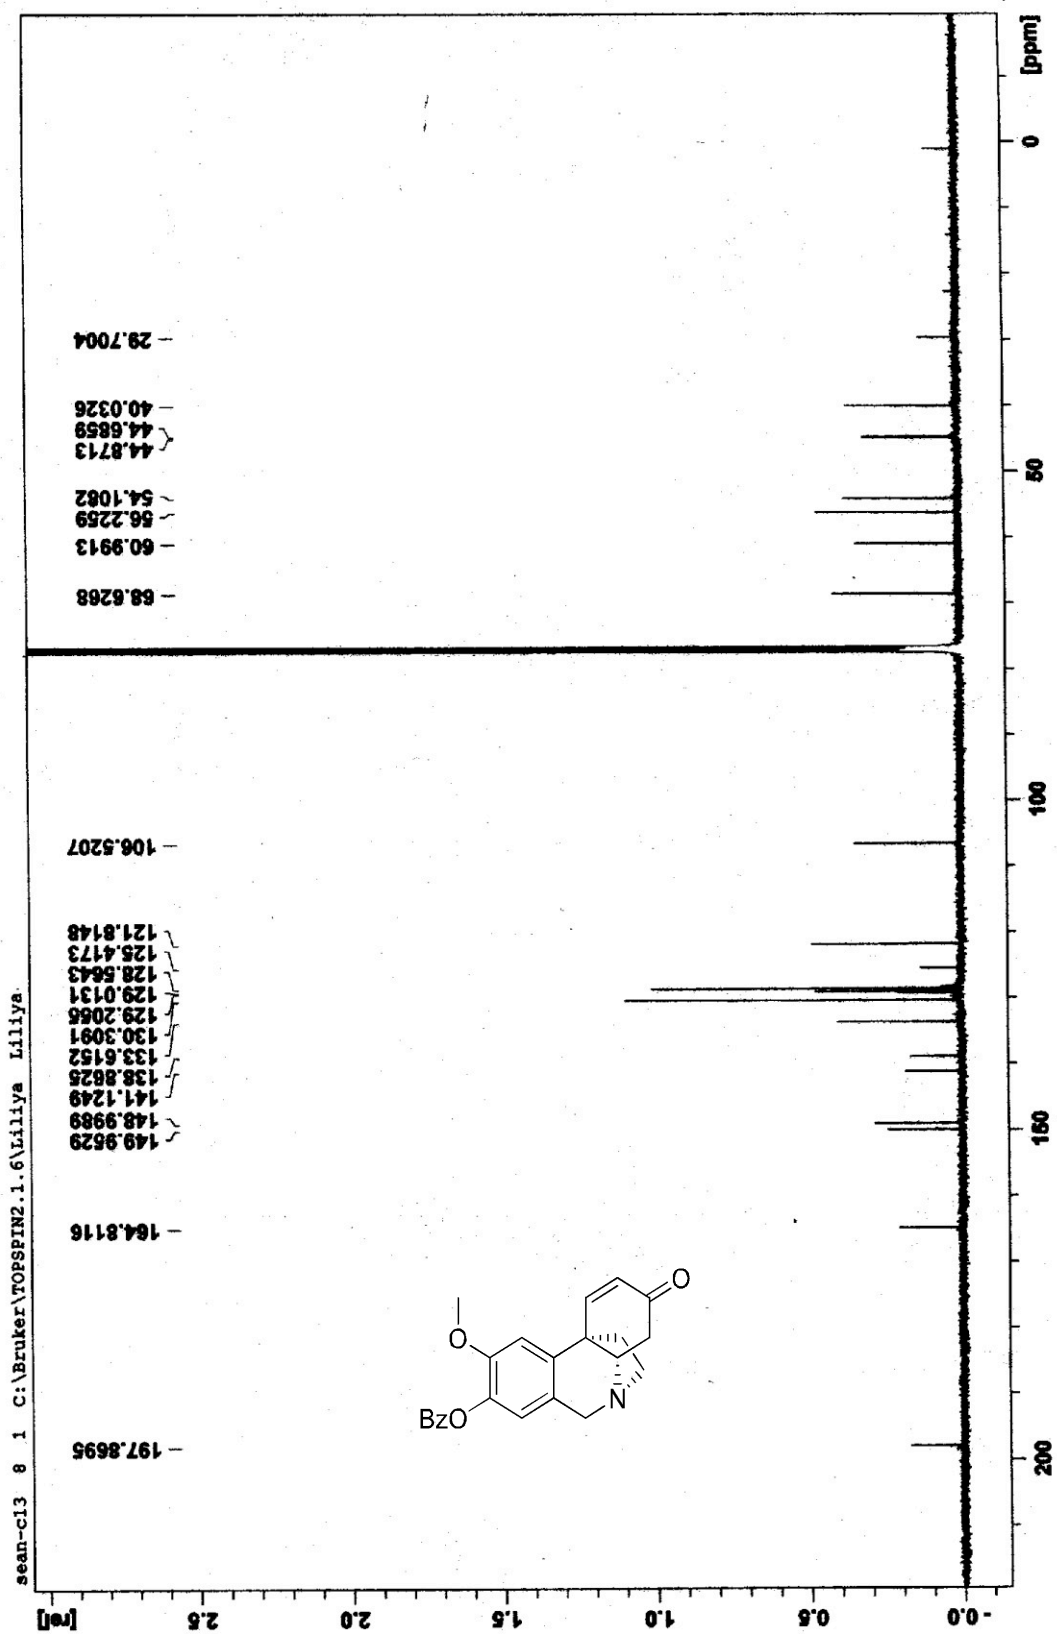

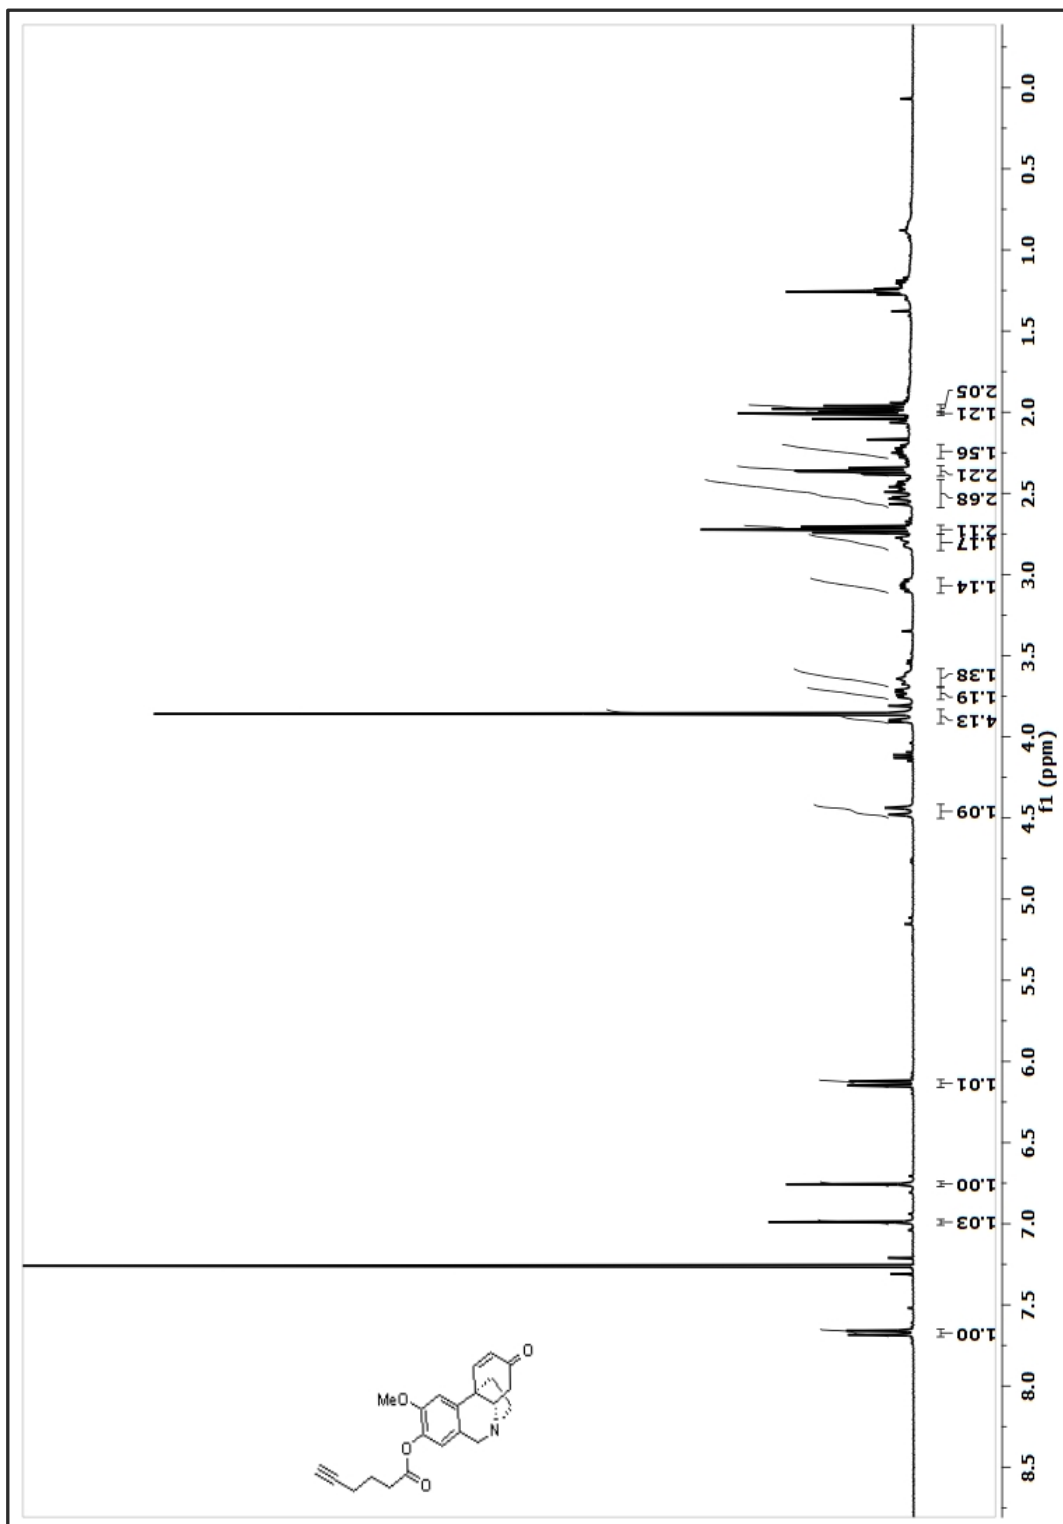

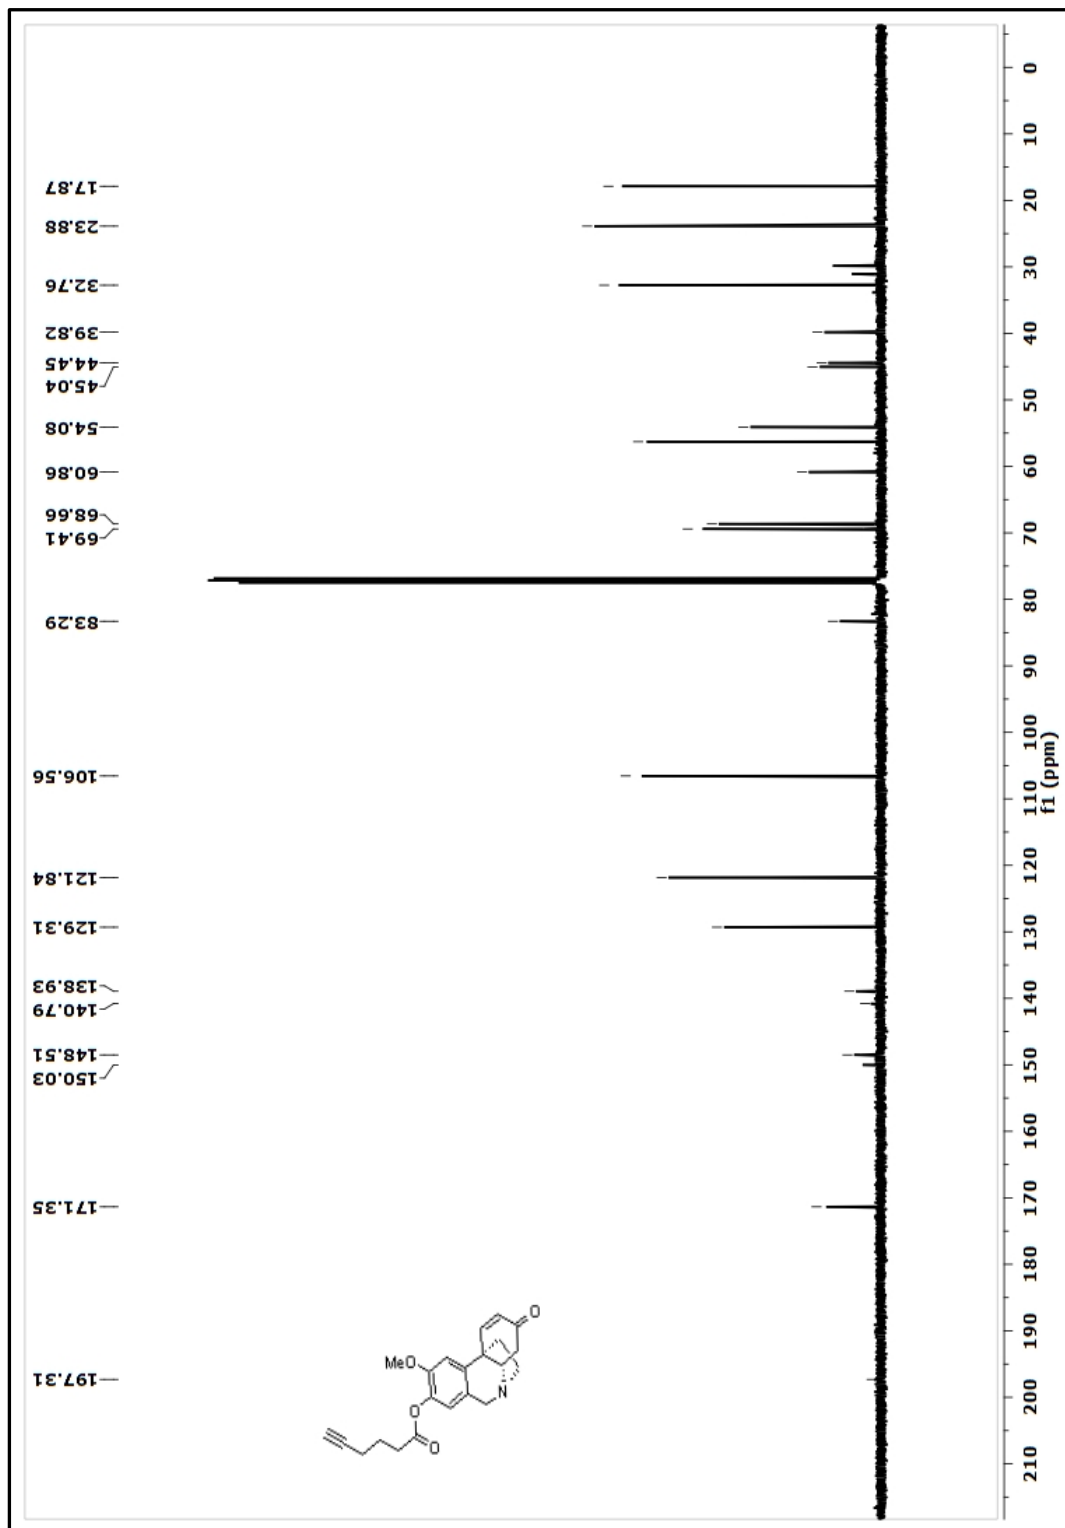

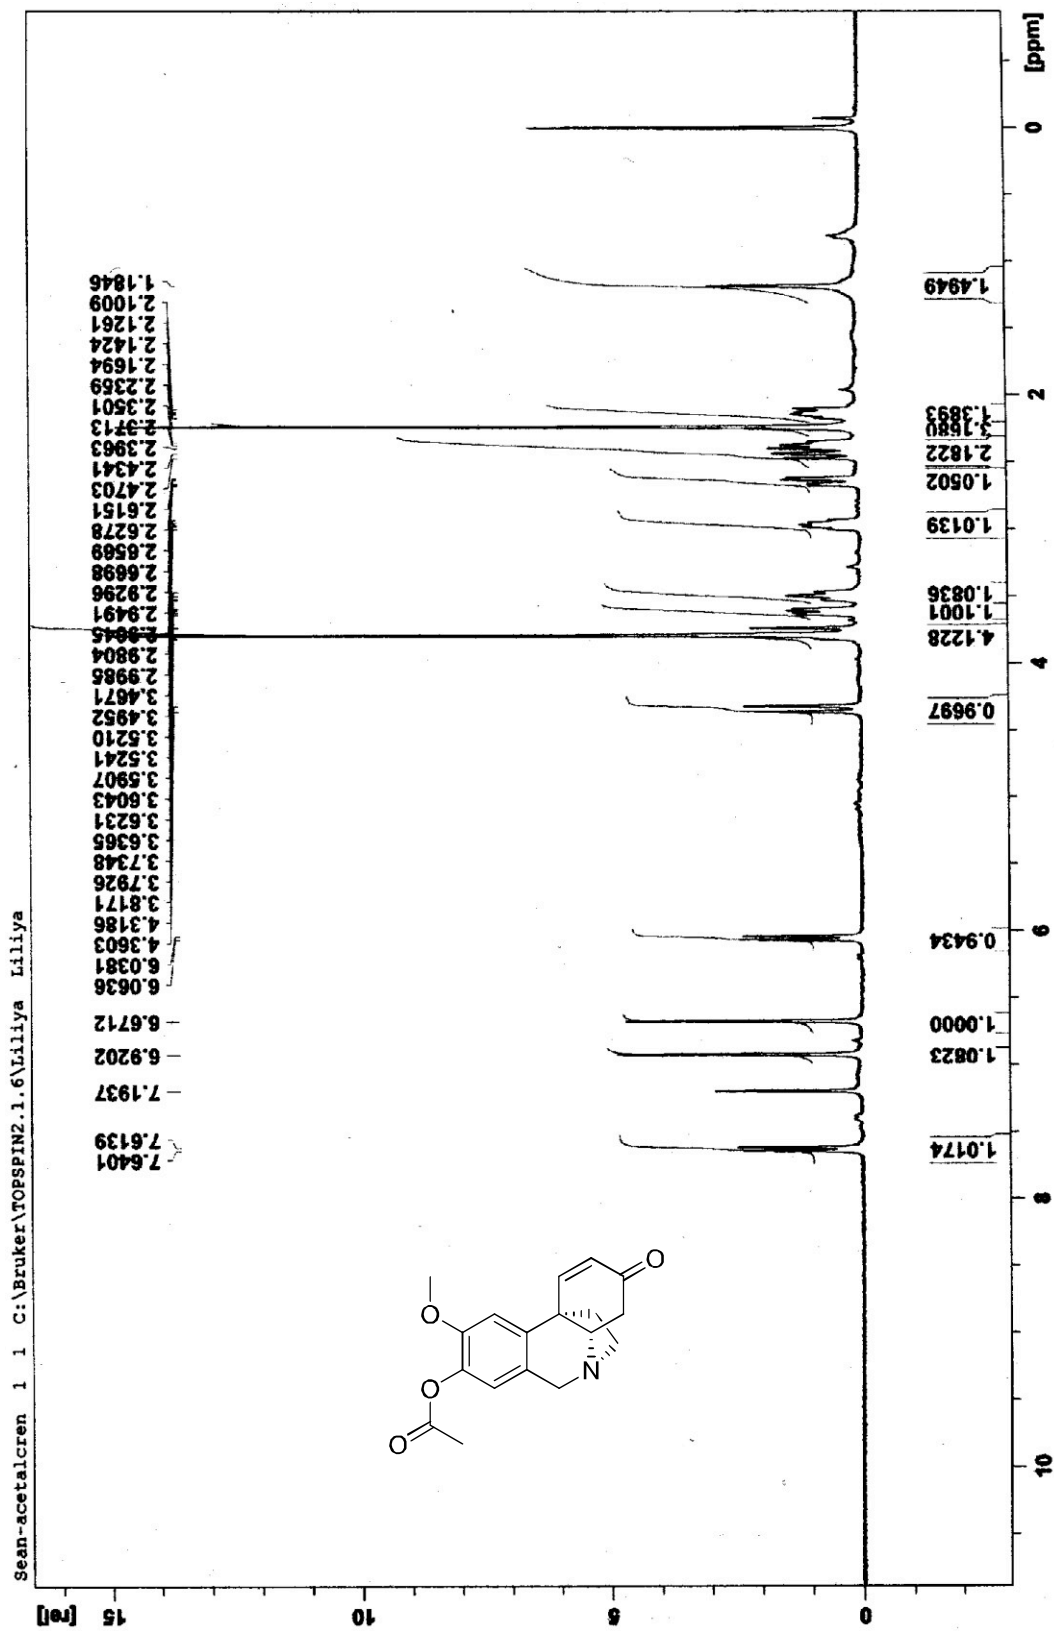

5p

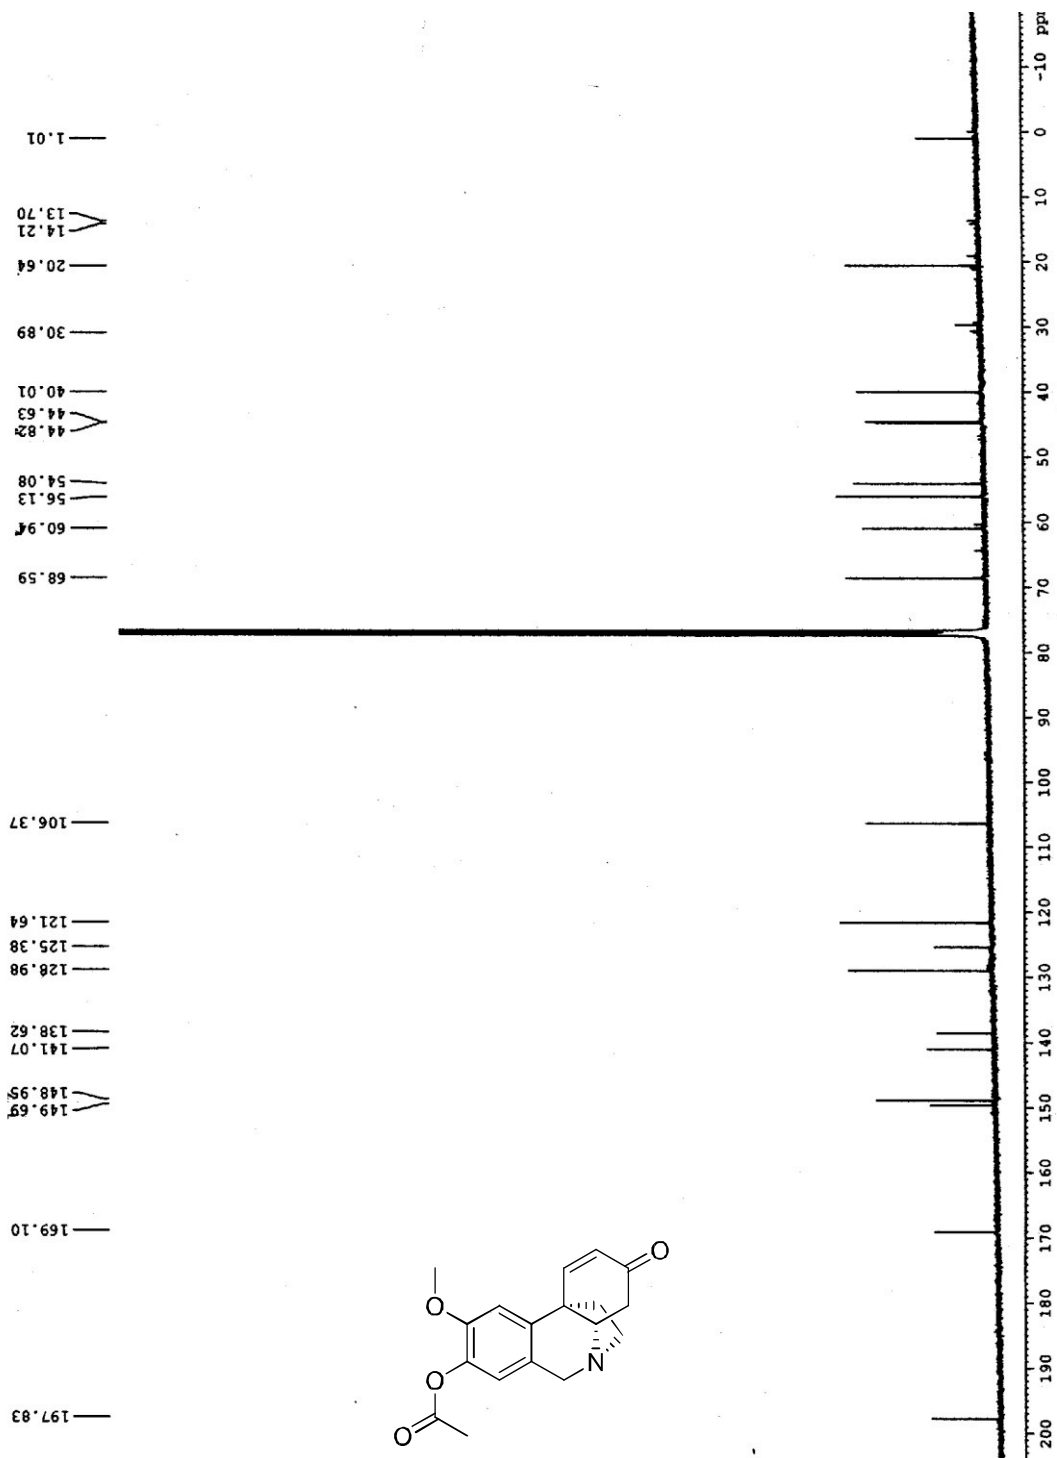

5q

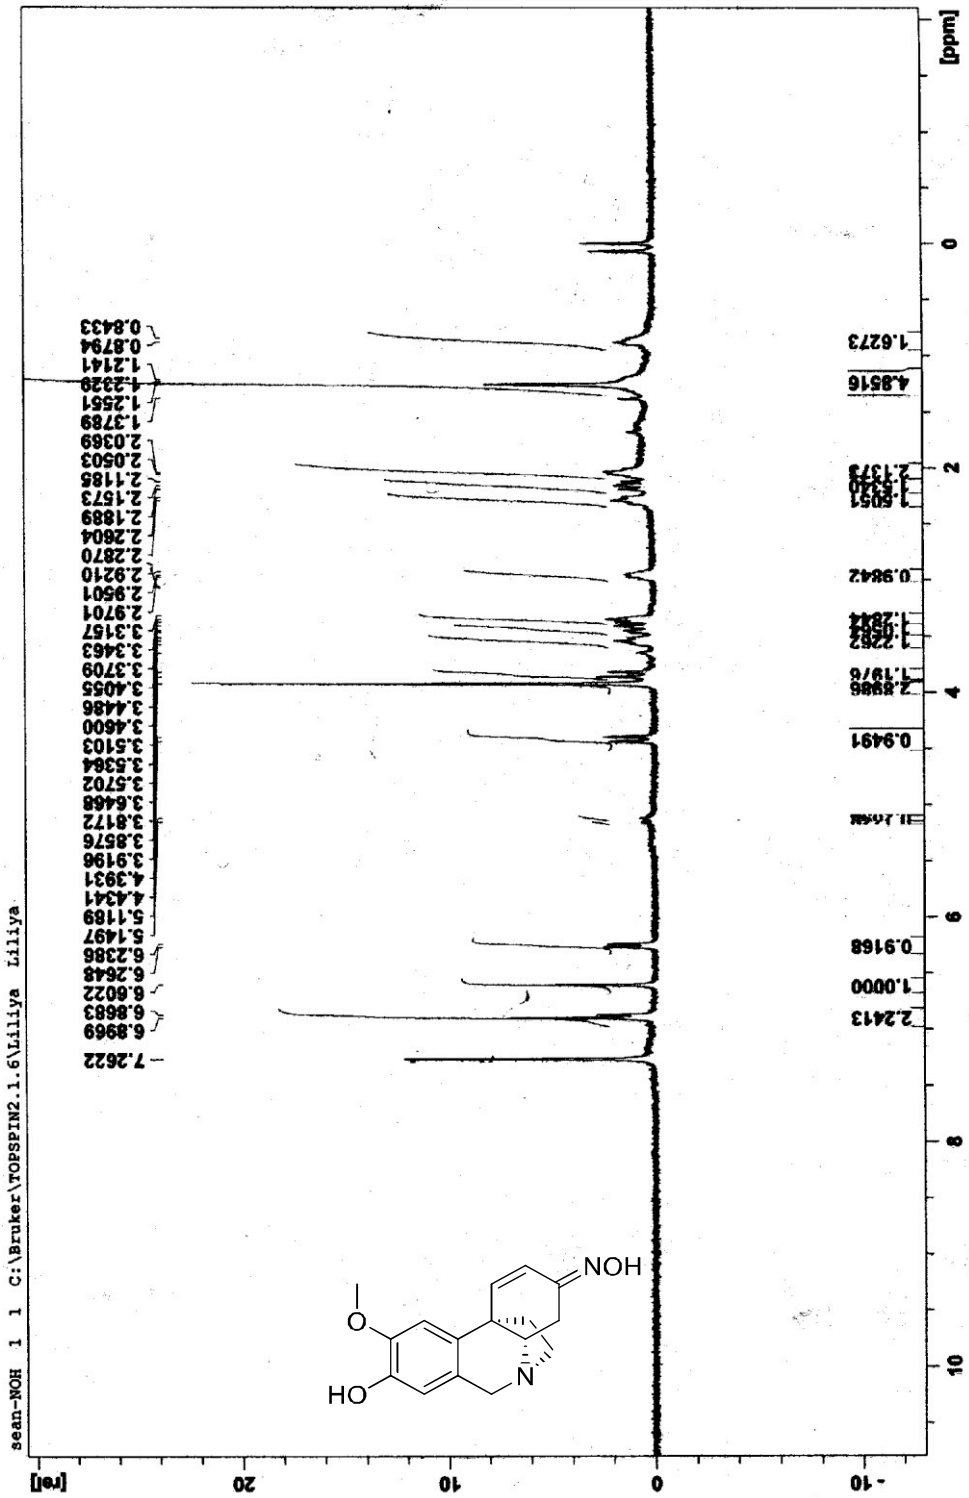



5q

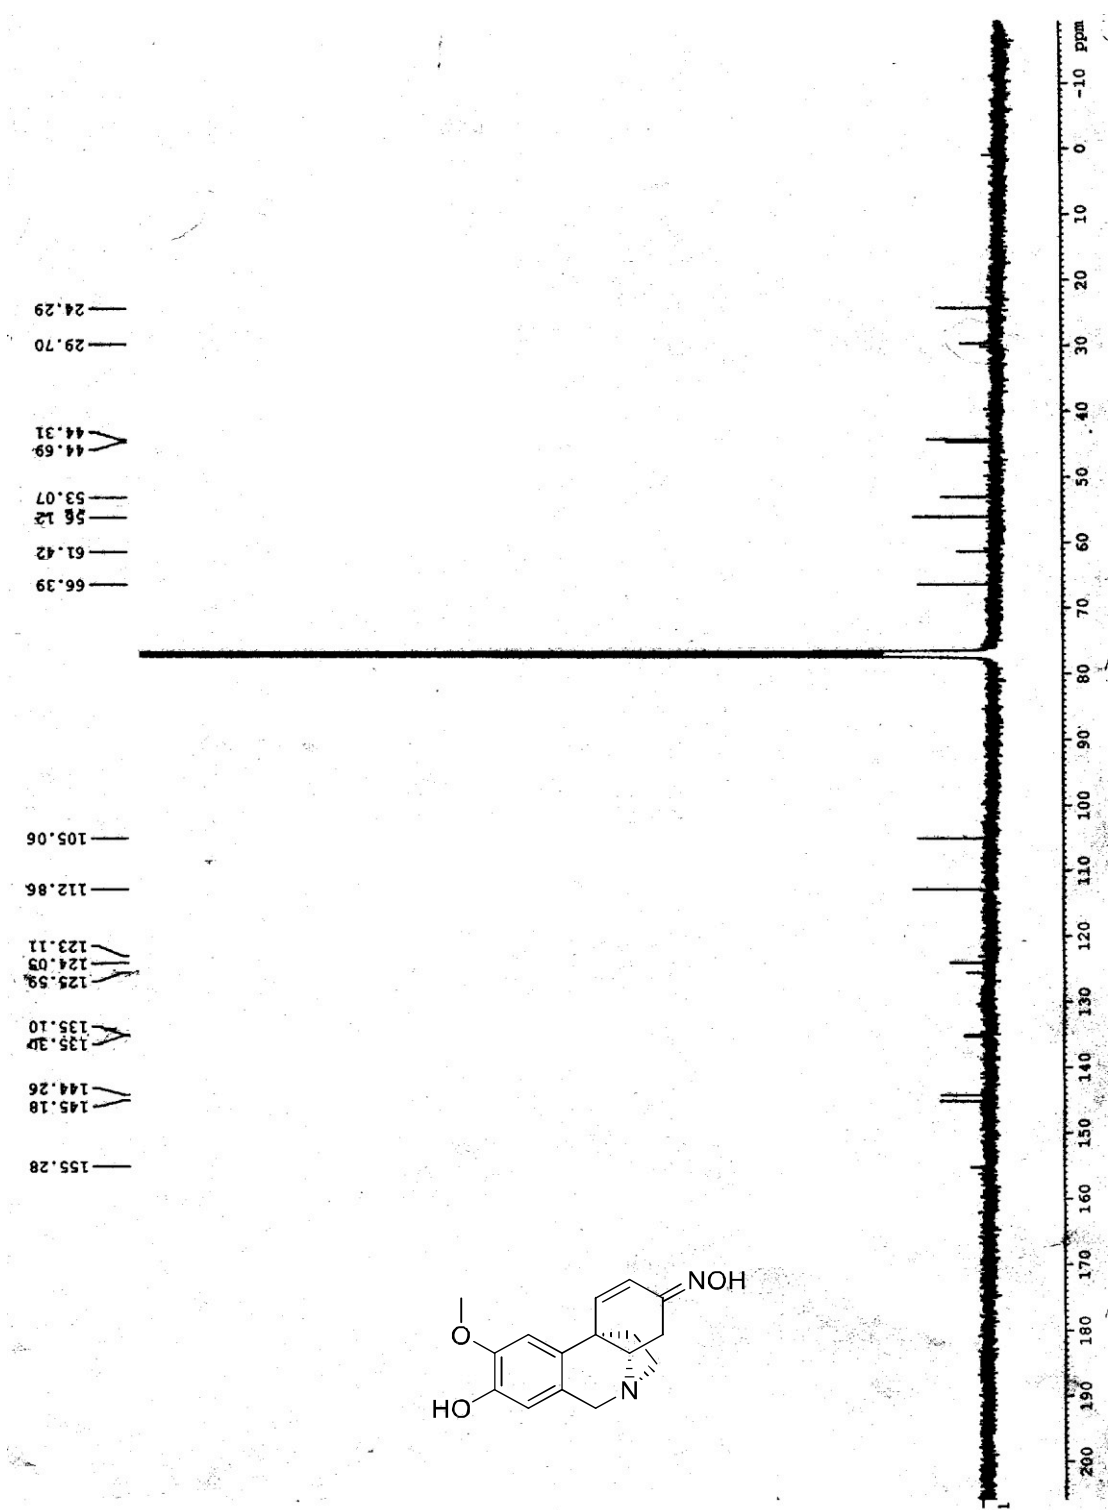

Supplement: NIHMS799832-supplement-SI.pdf [file NIHMS799832-supplement-SI.pdf]
